# Supplementary material for: Fundamental difference between simple arenes and PAHs found in o-PAH-connected porphyrins
Source: Royal Society of Chemistry journal article supplement (doi:10.1039/d3qo01549a), 2023-01-01
Supplement: d3qo01549a1.pdf [file d3qo01549a1.pdf]

# Supporting Information

## Fundamental Difference between Simple Aarenes and PAHs Found in *o*-PAH-connected porphyrins

Min-Sung Ko, Jung-Ho Hong, Pradeep P. Desale, Tae-Ho Roh and Dong-Gyu Cho\*

Department of Chemistry and Chemical Engineering, Inha University, Functional Molecule Synthesis Laboratory, Incheon 22212, Republic of Korea

E-mail: dgcho@inha.ac.kr

### Contents

|                                                                  |                |
|------------------------------------------------------------------|----------------|
| <b>1. General and Synthetic Experiments</b>                      | <b>S2–S8</b>   |
| <b>2. Stacked <sup>1</sup>H NMR and partial 2D NOESY spectra</b> | <b>S9–S12</b>  |
| <b>3. Single Crystal X-ray Analyses of 3a, Pd-3a, and 4a</b>     | <b>S13–S19</b> |
| <b>4. DFT, NICS, and HOMA Calculations</b>                       | <b>S19–S29</b> |
| <b>5. HR-Mass Data</b>                                           | <b>S30–S32</b> |
| <b>6. NMR Spectra</b>                                            | <b>S33–S52</b> |
| <b>7. Cartesian Coordinates of DFT-optimized Structures</b>      | <b>S53–S70</b> |

## 1. General and Synthetic Experiments

Reagents were purchased at the highest commercial quality and used without further purification, unless otherwise stated. Yields of synthesized compounds were measured after chromatographic purification. UV-vis spectra were recorded on a UV 1800 (Shimadzu) spectrophotometer.  $^1\text{H}$  and  $^{13}\text{C}$  NMR spectra were measured using JEOL (400 MHz) instruments. Mass spectra were obtained by using a JEOL LMS-HX-110 spectrometer (EI or FAB mode).

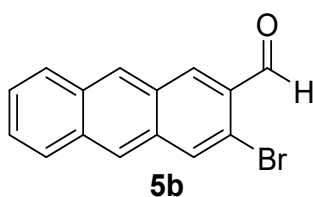

### 3-bromoanthracene-2-carbaldehyde (**5b**)

NMO (312 mg, 2.66 mmol) was added to a well-stirred solution of 2-bromo-3-(bromomethyl)anthracene (233 mg, 0.666 mmol) in anhydrous THF (27 mL) under Ar. The reaction mixture was refluxed at 85 °C for 1 h. After the resulting mixture was cooled to room temperature, water was added and the mixture was extracted with DCM. The organic layer was washed with water and dried over  $\text{Na}_2\text{SO}_4$ . The filtrate was evaporated to dryness and purified over silica gel (DCM/hexane, 1/9~1/1) to afford compound **5b** as a yellow powder (159 mg, 84%).

$^1\text{H}$  NMR (400 MHz, Chloroform-*d*)  $\delta$  10.51 (s, 1H), 8.63 (s, 1H), 8.56 (s, 1H), 8.32 (s, 1H), 8.26 (s, 1H), 8.01 (m, 2H), 7.54 (ddt,  $J = 8.2, 6.6, 5.1$  Hz, 2H);  $^{13}\text{C}$  NMR (100 MHz, Chloroform-*d*)  $\delta$  191.97, 133.98, 133.69, 133.50, 132.58, 132.41, 130.14, 129.94, 129.09, 128.73, 128.28, 127.70, 126.58, 125.52, 118.73; HR-EIMS:  $m/z$  calcd for  $\text{C}_{15}\text{H}_9\text{BrO}$   $[\text{M}]^+$ : 283.9837; found: 283.9840.

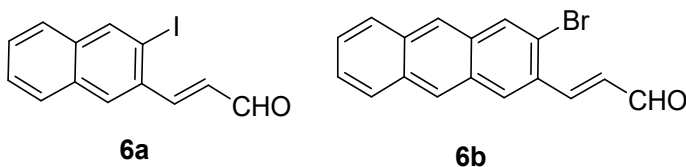

### (*E*)-3-(3-iodonaphthalen-2-yl)acrylaldehyde (**6a**)

To a 50 mL round bottom flask equipped with a magnetic bar were added toluene (0.7 mL), triphenylphosphoranylideneacetaldehyde (37.4 mg, 0.123 mmol) was added to a well-stirred solution of 3-iodo-2-naphthaldehyde (34.7 mg, 0.123 mmol) in anhydrous toluene (0.7 mL) under Ar. The resulting mixture was stirred at 60 °C for overnight. The reaction mixture was evaporated to dryness and purified over silica gel (EA/hexane, 1/4) to afford compound **6a** as a yellow solid (11.4 mg, 30%).

<sup>1</sup>H NMR (400 MHz, Chloroform-*d*) δ 9.81 (d, *J* = 7.7 Hz, 1H), 8.45 (s, 1H), 8.10 (s, 1H), 7.88 (d, *J* = 15.7 Hz, 1H), 7.84 (m, 1H), 7.72 (m, 1H), 7.54 (m, 2H), 6.73 (dd, *J* = 15.6, 7.8 Hz, 1H); <sup>13</sup>C NMR (100 MHz, Chloroform-*d*) δ 193.37, 155.73, 139.50, 135.69, 133.71, 132.64, 130.90, 128.71, 128.47, 127.55, 127.47, 126.68, 96.90; HR-EIMS: *m/z* calcd for C<sub>13</sub>H<sub>9</sub>IO [M]<sup>+</sup>: 307.9698; found: 307.9696.

#### **(*E*)-3-(3-bromoanthracen-2-yl)acrylaldehyde (6b)**

By following the general procedure of **6a**, the reaction of **5b** (76.8 mg, 0.269 mmol) yielded **6b** (34.4 mg, 41% yield).

<sup>1</sup>H NMR (400 MHz, Chloroform-*d*) δ 9.81 (d, *J* = 7.7 Hz, 1H), 8.42 (s, 1H), 8.29 (m, 3H), 8.02 (d, *J* = 15.7 Hz, 1H), 7.98 (m, 2H), 7.51 (m, 2H), 6.83 (dd, *J* = 15.8, 7.7 Hz, 1H); <sup>13</sup>C NMR (100 MHz, Chloroform-*d*) δ 193.48, 151.12, 133.21, 132.39, 132.36, 132.11, 130.80, 130.62, 129.72, 128.89, 128.53, 128.28, 128.09, 127.07, 126.45, 125.40, 120.76; HR-EIMS: *m/z* calcd for C<sub>17</sub>H<sub>11</sub>BrO [M]<sup>+</sup>: 309.9993; found: 309.9995.

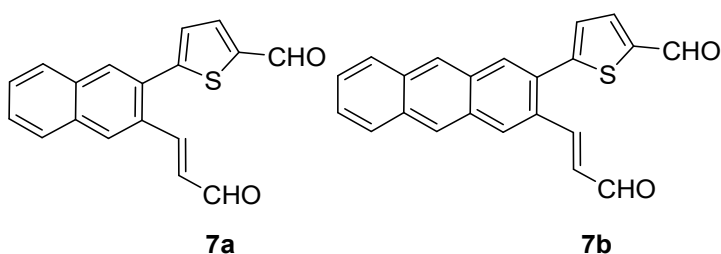

#### **(*E*)-5-(3-(3-oxoprop-1-en-1-yl)naphthalen-2-yl)thiophene-2-carbaldehyde (7a)**

5-Formyl-2-thiopheneboronic acid (71.0 mg, 0.453 mmol) and Na<sub>2</sub>CO<sub>3</sub> (241 mg, 2.27 mmol) were added to the solution of (*E*)-3-(2-iodophenyl)acrylaldehyde (70.0 mg, 0.227 mmol) in a mixture of 2.4 mL of

anhydrous DMF and 0.5 mL of H<sub>2</sub>O. The resulting mixture was degassed for 5 min, and then Pd(PPh<sub>3</sub>)<sub>4</sub> (27.0 mg, 0.023 mmol) was added to the solution under Ar. The resulting mixture was heated at 85 °C for 6 h. After cooling the reaction to room temperature, DMF was evaporated. The reaction mixture was extracted with EtOAc. The organic layer was dried over anhydrous Na<sub>2</sub>SO<sub>4</sub> and evaporated to dryness. The residue was purified over silica gel (EA/hexane, 1/3) to afford **7a** as a light green solid (53.0 mg, 80%).

<sup>1</sup>H NMR (400 MHz, Chloroform-*d*) δ 9.96 (s, 1H), 9.69 (d, *J* = 7.8 Hz, 1H), 8.22 (s, 1H), 8.01 (s, 1H), 7.93 (m, 1H), 7.89 (m, 1H), 7.83 (d, *J* = 3.6 Hz, 1H), 7.79 (d, *J* = 15.8 Hz, 1H), 7.60 (m, 2H), 7.20 (d, *J* = 3.6 Hz, 1H), 6.83 (dd, *J* = 15.8, 7.8 Hz, 1H); <sup>13</sup>C NMR (100 MHz, Chloroform-*d*) δ 193.38, 182.88, 151.10, 150.55, 144.45, 136.61, 133.87, 133.08, 130.85, 130.76, 130.69, 130.62, 129.40, 128.61, 128.58, 128.30, 128.17, 128.05; HR-EIMS: *m/z* calcd for C<sub>18</sub>H<sub>12</sub>O<sub>2</sub>S [M]<sup>+</sup>: 292.0558; found: 292.0556.

#### **(*E*)-5-(3-(3-oxoprop-1-en-1-yl)anthracen-2-yl)thiophene-2-carbaldehyde (7b)**

By following the general procedure of **7a**, the reaction of **6b** (178 mg, 0.572 mmol) yielded **7b** (159 mg, 81% yield).

<sup>1</sup>H NMR (400 MHz, Chloroform-*d*) δ 9.97 (s, 1H), 9.69 (d, *J* = 7.7 Hz, 1H), 8.50 (s, 1H), 8.44 (s, 1H), 8.37 (s, 1H), 8.16 (s, 1H), 8.02 (m, 2H), 7.83 (d, *J* = 3.8 Hz, 1H), 7.79 (dd, *J* = 15.8, 0.7 Hz, 1H), 7.53 (m, 2H), 7.23 (d, *J* = 3.8 Hz, 1H), 6.84 (dd, *J* = 15.8, 7.7 Hz, 1H); <sup>13</sup>C NMR (100 MHz, Chloroform-*d*) δ 193.40, 182.88, 151.31, 150.73, 144.25, 136.70, 133.26, 132.89, 131.08, 131.05, 130.68, 130.49, 130.23, 129.95, 129.23, 129.21, 128.52, 128.41, 127.82, 127.14, 126.94, 126.71; HR-EIMS: *m/z* calcd for C<sub>22</sub>H<sub>14</sub>O<sub>2</sub>S [M]<sup>+</sup>: 342.0715; found: 342.0712.

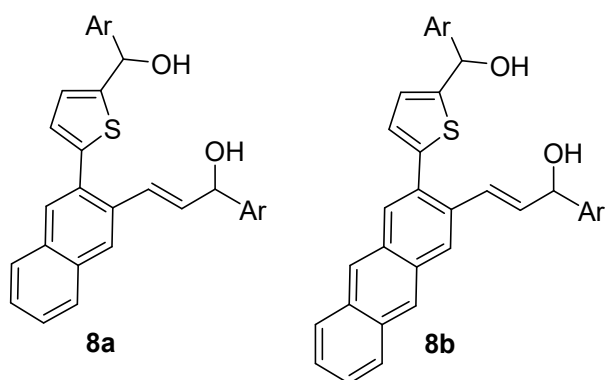

**(E)-3-(3-(5-(hydroxy(*p*-tolyl)methyl)thiophen-2-yl)naphthalen-2-yl)-1-(*p*-tolyl)prop-2-en-1-ol (**8a**)**

*p*-Tolylmagnesium bromide solution (1.0 mL, 1.03 mmol) was added to a well-stirred solution of **7a** (50.0 mg, 0.171 mmol) in THF (1.8 mL) at -78 °C under Ar. The mixture was stirred at same temperature for 2 h. The reaction mixture was poured into an aqueous saturated solution of NH<sub>4</sub>Cl and extracted with EtOAc. The organic layer was dried over anhydrous Na<sub>2</sub>SO<sub>4</sub> and evaporated to dryness. The residue was purified over silica gel (EA/hexane, 2/3) to afford **8a** as a green foam (60.3 mg, 74%).

<sup>1</sup>H NMR (400 MHz, Acetonitrile-*d*<sub>3</sub>) δ 7.97 (s, 1H), 7.85 (s, 1H), 7.80 (m, 2H), 7.44 (m, 2H), 7.35 (d, *J* = 7.9 Hz, 2H), 7.27 (d, *J* = 8.2 Hz, 2H), 7.18 (d, *J* = 8.0 Hz, 2H), 7.15 (d, *J* = 7.9 Hz, 2H), 6.93 (d, *J* = 3.6 Hz, 1H), 6.84 (m, 2H), 6.37 (dd, *J* = 15.6, 6.1 Hz, 1H), 5.98 (d, *J* = 4.0 Hz, 1H), 5.24 (t, *J* = 5.1 Hz, 1H), 4.08 (d, *J* = 4.1 Hz, 1H), 3.48 (d, *J* = 4.1 Hz, 1H), 2.31 (s, 3H), 2.30 (s, 3H); <sup>13</sup>C NMR (100 MHz, Acetonitrile-*d*<sub>3</sub>) δ 150.57, 141.50, 141.13, 140.91, 137.45, 137.02, 135.26, 135.24, 134.07, 132.83, 132.64, 131.67, 129.06, 129.05, 128.79, 128.22, 127.64, 127.37, 126.62, 126.47, 126.41, 126.23, 125.79, 124.57, 73.95, 71.52, 20.23 (one carbon signal overlapped); HR-EIMS: *m/z* calcd for C<sub>32</sub>H<sub>28</sub>O<sub>2</sub>S [M]<sup>+</sup>: 476.1810; found: 476.1813.

**(E)-3-(3-(5-(hydroxy(*p*-tolyl)methyl)thiophen-2-yl)anthracen-2-yl)-1-(*p*-tolyl)prop-2-en-1-ol (**8b**)**

By following the general procedure of **8a**, the reaction of **7b** (94.0 mg, 0.275 mmol) yielded **8b** (108 mg, 75% yield).

<sup>1</sup>H NMR (400 MHz, Acetonitrile-*d*<sub>3</sub>) δ 8.37 (s, 1H), 8.36 (s, 1H), 8.08 (s, 1H), 7.98 (s, 1H), 7.95 (m, 2H), 7.43 (m, 2H), 7.36 (d, *J* = 8.1 Hz, 2H), 7.28 (d, *J* = 8.1 Hz, 2H), 7.17 (m, 4H), 6.95 (d, *J* = 3.5 Hz, 1H),

6.86 (m, 2H), 6.40 (dd,  $J = 15.7, 5.7$  Hz, 1H), 5.98 (d,  $J = 3.4$  Hz, 1H), 5.25 (m, 1H), 4.18 (d,  $J = 4.2$  Hz, 1H), 3.58 (d,  $J = 4.2$  Hz, 1H), 2.31 (s, 3H), 2.30 (s, 3H);  $^{13}\text{C}$  NMR (100 MHz, Acetonitrile- $d_3$ )  $\delta$  150.56, 141.50, 141.15, 140.89, 137.46, 137.03, 135.36, 135.33, 134.00, 132.17, 132.05, 131.62, 130.89, 130.76, 129.08, 129.05, 128.73, 128.40, 128.11, 127.38, 126.46, 126.43, 126.25, 126.12, 126.03, 125.85, 125.78, 124.62, 73.97, 71.55, 20.25 (one carbon signal overlapped); HR-EIMS:  $m/z$  calcd for  $\text{C}_{36}\text{H}_{30}\text{O}_2\text{S}$   $[\text{M}]^+$ : 526.1967; found: 526.1970.

#### ***o*-naphthalene-connected carbaporphyrin (4a)**

Boron trifluoride diethyl etherate (0.046 mL, 0.370 mmol) was added to the solution of **8a** (220 mg, 0.462 mmol) and 5-(4-methylphenyl)dipyrromethane (109 mg, 0.462 mmol) in distilled dichloromethane (400 mL) under Ar at room temperature. The solution was stirred in the dark under Ar for 1 h. Then, chloranil (342 mg, 1.39 mmol) was added and the reaction mixture was stirred for 1 h. The solvents were removed and the residual was then directly purified by chromatography over silica gel, eluting with DCM/hexane (1/1). The green fraction was collected and the solvent was removed under reduced pressure. The solid was washed with methanol, recrystallized with dichloromethane and washed with hexane which afforded **4a** as a dark green solid (24.8 mg, 8%).

$^1\text{H}$  NMR (400 MHz, Chloroform- $d$ )  $\delta$  9.72 (s, 1H), 8.38 (s, 1H), 8.13 (s, 1H), 7.95 (m, 2H), 7.60 (d,  $J = 8.1$  Hz, 2H), 7.55 (m, 2H), 7.41 (m, 5H), 7.33 (m, 4H), 7.24 (m, 2H), 7.07 (m, 2H), 6.93 (d,  $J = 4.9$  Hz, 1H), 6.86 (d,  $J = 4.9$  Hz, 1H), 6.82 (d,  $J = 3.7$  Hz, 1H), 6.59 (d,  $J = 3.7$  Hz, 1H), 5.30 (d,  $J = 16.4$  Hz, 1H), 2.51 (s, 3H), 2.47 (s, 3H), 2.44 (s, 3H);  $^{13}\text{C}$  NMR (100 MHz, Chloroform- $d$ )  $\delta$  169.62, 160.82, 154.52, 152.24, 147.72, 143.53, 141.58, 140.86, 137.98, 137.56, 137.25, 136.98, 136.52, 136.35, 135.93, 135.13, 134.16, 132.55, 132.47, 132.41, 132.07, 131.87, 131.82, 131.06, 130.41, 130.26, 130.15, 129.85, 129.52, 129.27, 128.73, 128.65, 127.81, 127.68, 126.71, 122.50, 109.08, 21.47, 21.34 (three carbon signals overlapped); HR-FABMS:  $m/z$  calcd for  $\text{C}_{48}\text{H}_{37}\text{N}_2\text{S}$   $[\text{M} + \text{H}]^+$ : 673.2677; found: 673.2674.

#### ***o*-anthracene-connected carbaporphyrin (4b)**

By following the general procedure of **4a**, the reaction of **8b** (77.0 mg, 0.146 mmol) yielded **4b** (9.51 mg, 9% yield).

<sup>1</sup>H NMR (400 MHz, Chloroform-*d*) δ 10.62 (s, 1H), 8.49 (s, 2H), 8.40 (s, 1H), 8.17 (s, 1H), 8.03 (m, 2H), 7.58 (d, *J* = 8.0 Hz, 2H), 7.50 (m, 2H), 7.40 (d, *J* = 8.0 Hz, 2H), 7.33 (m, 7H), 7.24 (m, 2H), 7.18 (d, *J* = 16.3 Hz, 1H), 6.97 (d, *J* = 5.2 Hz, 1H), 6.89 (d, *J* = 3.6 Hz, 1H), 6.83 (d, *J* = 4.9 Hz, 1H), 6.75 (d, *J* = 4.9 Hz, 1H), 6.67 (d, *J* = 3.6 Hz, 1H), 5.67 (d, *J* = 16.4 Hz, 1H), 2.51 (s, 3H), 2.46 (s, 3H), 2.43 (s, 3H); <sup>13</sup>C NMR (100 MHz, Chloroform-*d*) δ 162.10, 154.02, 153.11, 147.58, 143.45, 141.81, 137.97, 137.66, 137.57, 137.18, 136.50, 136.38, 136.02, 135.76, 134.29, 132.96, 132.66, 132.20, 131.88, 131.69, 130.84, 130.77, 130.70, 130.46, 130.27, 130.11, 130.01, 129.99, 129.84, 129.55, 129.31, 128.87, 128.76, 128.63, 128.37, 126.41, 126.17, 125.85, 125.80, 121.83, 108.99, 21.49, 21.46, 21.33 (two carbon signals overlapped); HR-FABMS: *m/z* calcd for C<sub>52</sub>H<sub>39</sub>N<sub>2</sub>S [M + H]<sup>+</sup>: 723.2834; found: 723.2830.

#### **Pd complex of *o*-anthracene-connected carbaporphyrin (Pd-4b)**

Palladium(II) acetate (9.9 mg, 0.0442 mmol in 0.9 mL of HPLC grade acetonitrile) was added to the solution of **4b** (6.40 mg, 0.00885 mmol) in distilled dichloromethane (9 mL). The mixture was stirred for 12 h. The solution was then purified by column chromatography over silica gel, eluting with dichloromethane. The green fraction was collected and the solvents were removed under reduced pressure. The solid was recrystallized with dichloromethane and washed with hexane, which afforded **Pd-4b** as a dark green solid (3.3 mg, 45%).

<sup>1</sup>H NMR (400 MHz, Chloroform-*d*) δ 9.17 (s, 1H), 9.12 (s, 1H), 8.86 (s, 1H), 8.81 (s, 1H), 8.16 (dt, *J* = 6.3, 2.4 Hz, 2H), 7.90 (s, 1H), 7.86 (d, *J* = 3.9 Hz, 1H), 7.55 (m, 10H), 7.35 (dd, *J* = 8.0 Hz, 2H), 7.29 (m, 5H), 7.25 (m, 1H), 7.21 (d, *J* = 5.0 Hz, 1H), 2.50 (d, *J* = 1.8 Hz, 6H), 2.44 (s, 3H); <sup>13</sup>C NMR (100 MHz, Chloroform-*d*) δ 152.73, 151.30, 149.02, 144.16, 143.18, 140.96, 140.65, 138.51, 138.17, 136.94, 136.85, 136.73, 136.13, 134.86, 133.09, 132.96, 132.72, 132.60, 132.29, 132.01, 131.88, 131.81, 131.32, 130.44, 130.12, 129.48, 129.42, 129.32, 129.12, 128.81, 128.64, 128.41, 128.32, 128.28, 127.07, 125.65,

125.60, 125.50, 125.28, 124.85, 123.06, 113.24, 21.48, 21.42, 21.33 (one carbon signal overlapped); HR-FAB: m/z calcd for C<sub>52</sub>H<sub>36</sub>N<sub>2</sub>PdS [M]<sup>+</sup>: 826.1634; found: 826.1637.



## 2. Stacked $^1\text{H}$ NMR and partial 2D NOESY spectra

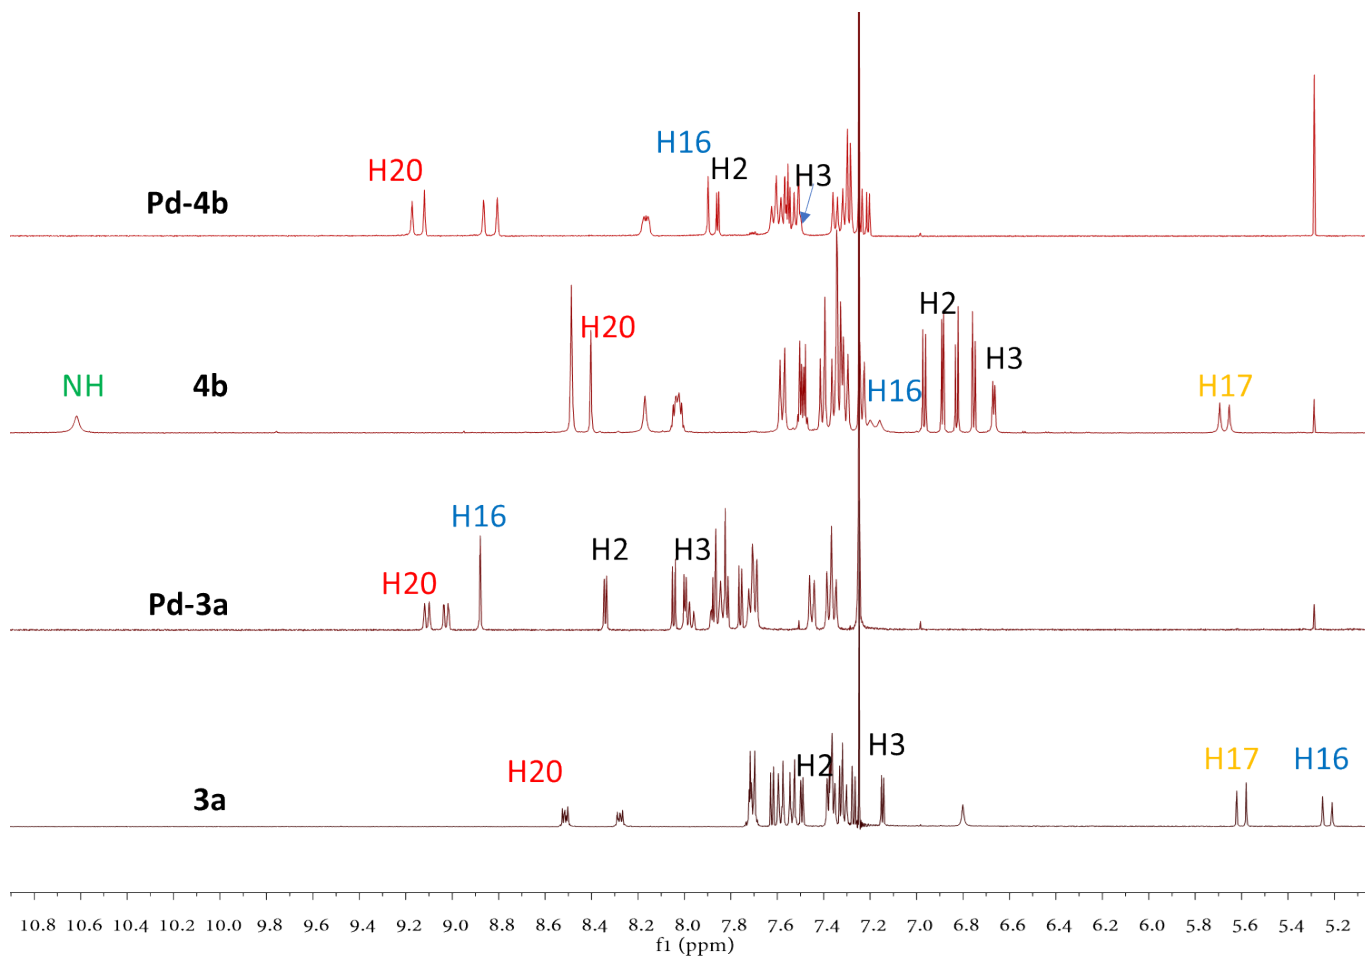

**Figure S1.** Stacked  $^1\text{H}$  NMR spectra of **3a**, **Pd-3a**, **4b**, and **Pd-4b** in  $\text{CDCl}_3$  at 298 K

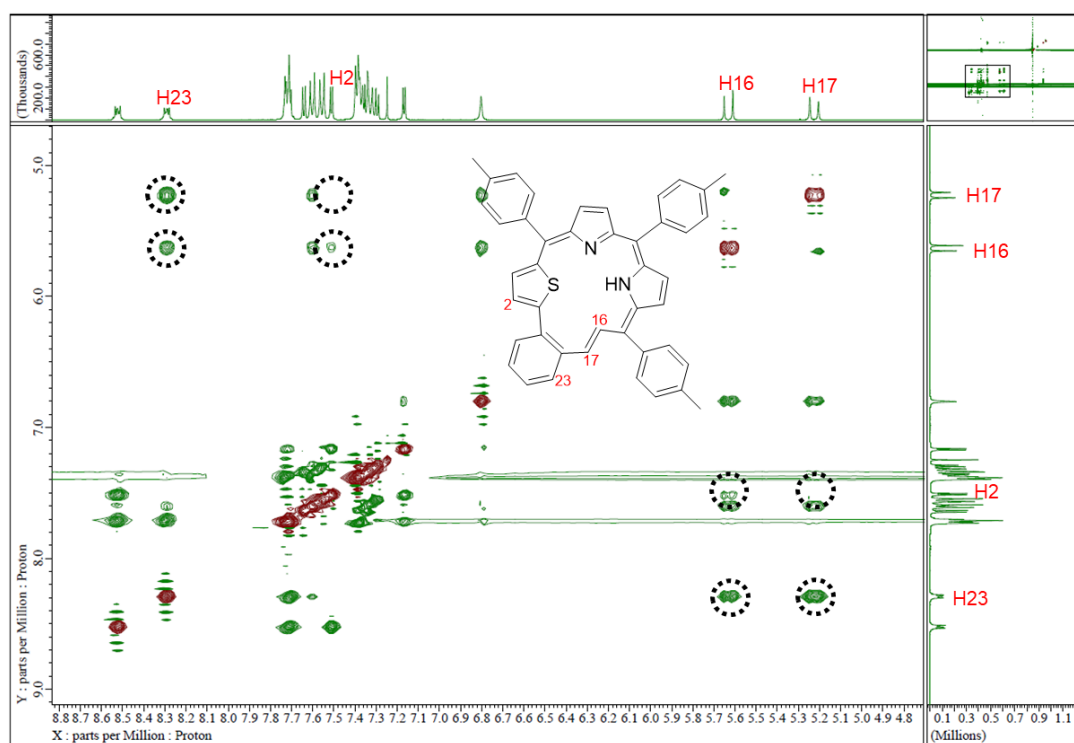

**Figure S2.** Partial 2D NOESY spectrum of **3a** in CDCl<sub>3</sub> at 298 K (400 MHz)

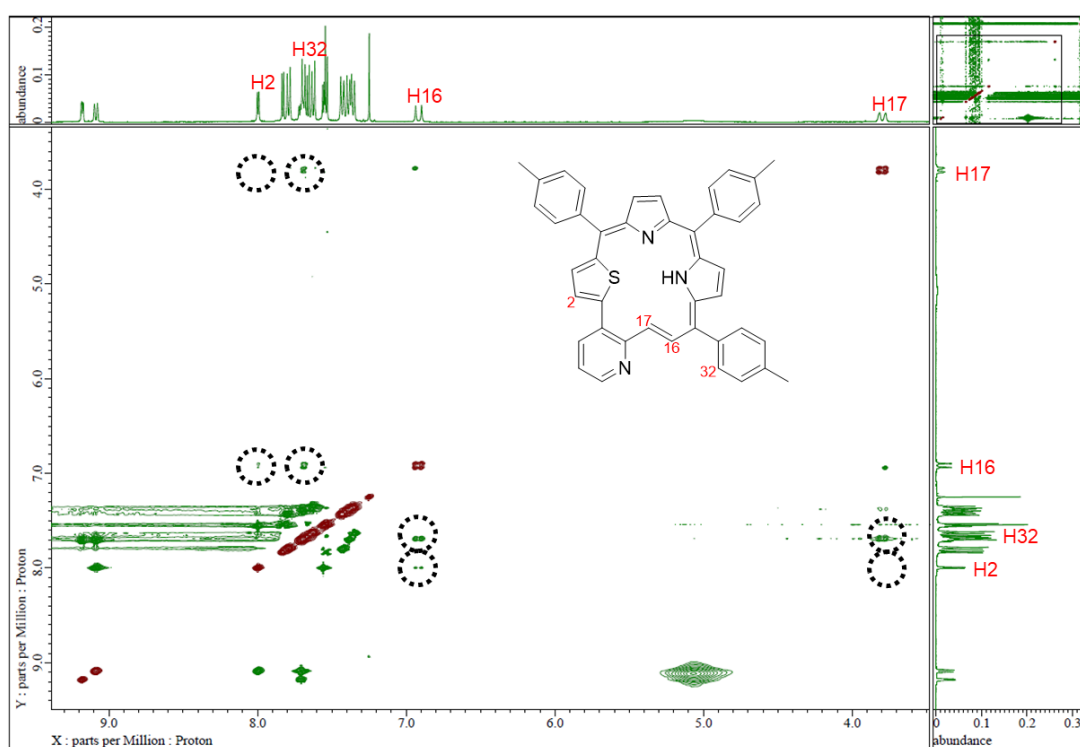

**Figure S3.** Partial 2D NOESY spectrum of **3b** in CDCl<sub>3</sub> at 298 K (400 MHz)

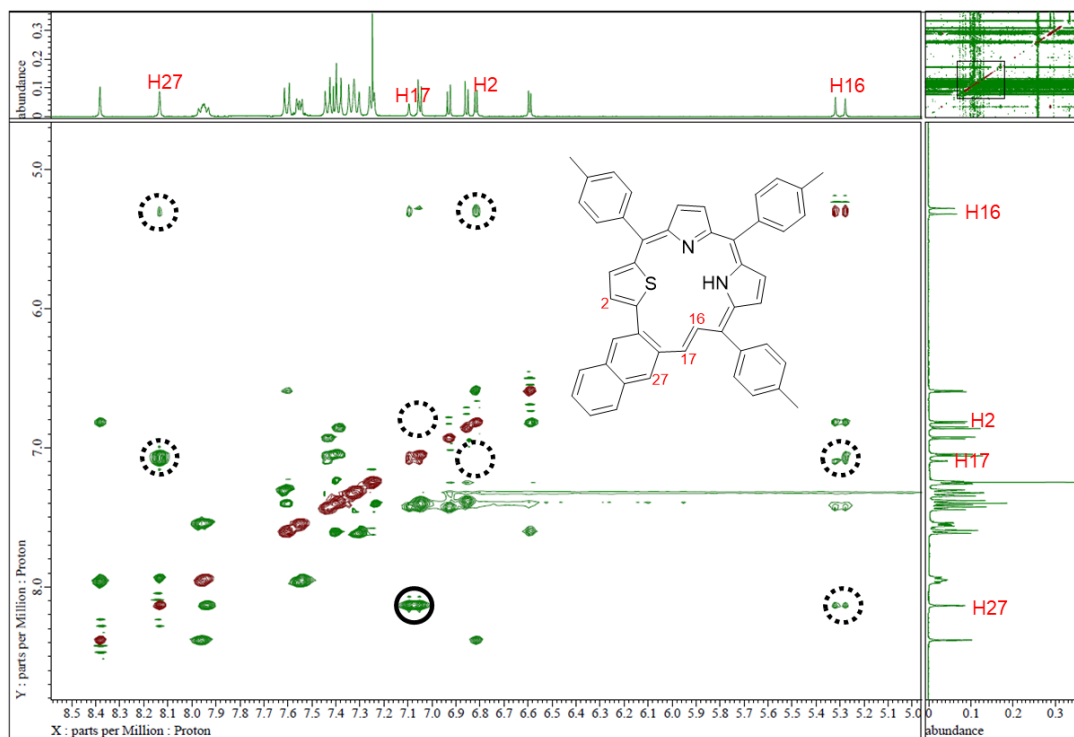

**Figure S4.** Partial 2D NOESY spectrum of **4a** in  $\text{CDCl}_3$  at 298 K (400 MHz)

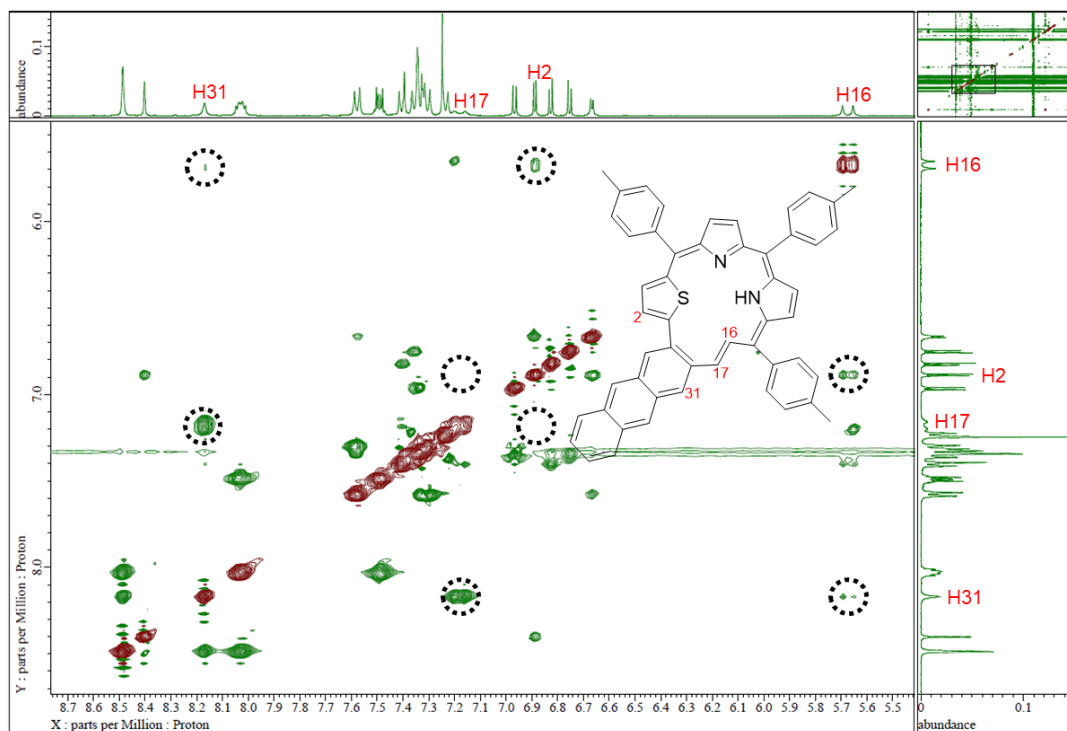

**Figure S5.** Partial 2D NOESY spectrum of **4b** in  $\text{CDCl}_3$  at 298 K (400 MHz)

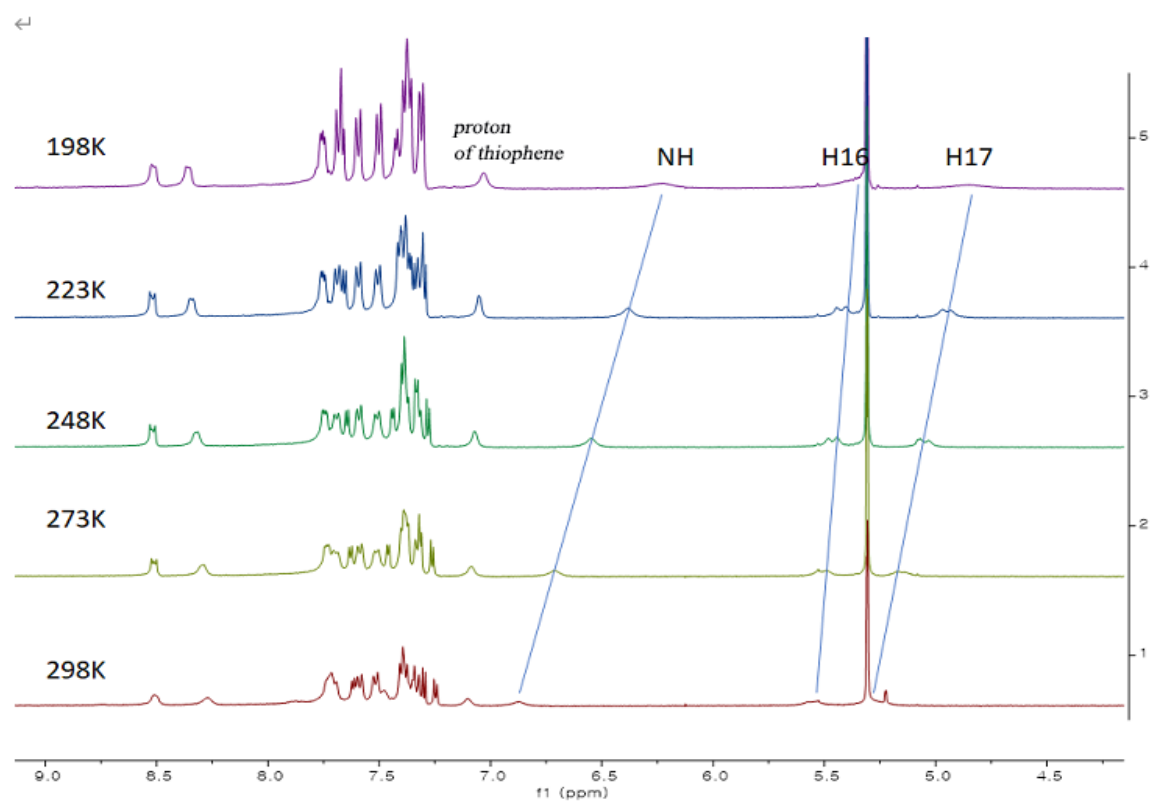

**Figure S6.** Variable temperature <sup>1</sup>H NMR spectra of **3a** in CD<sub>2</sub>Cl<sub>2</sub> (400 MHz)

### 3. Single Crystal X-ray Analyses of 3a, Pd-3a, and 4a

(a)

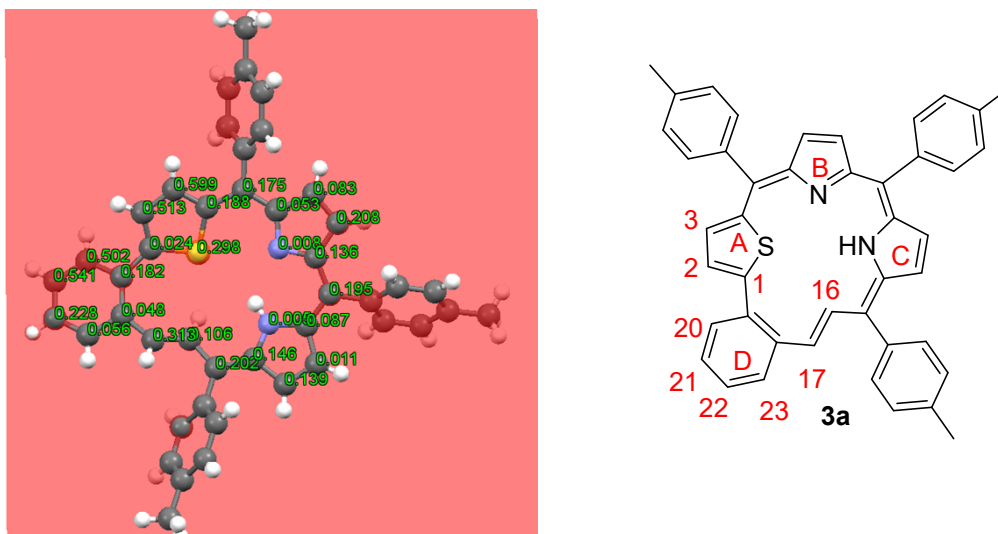

(b)

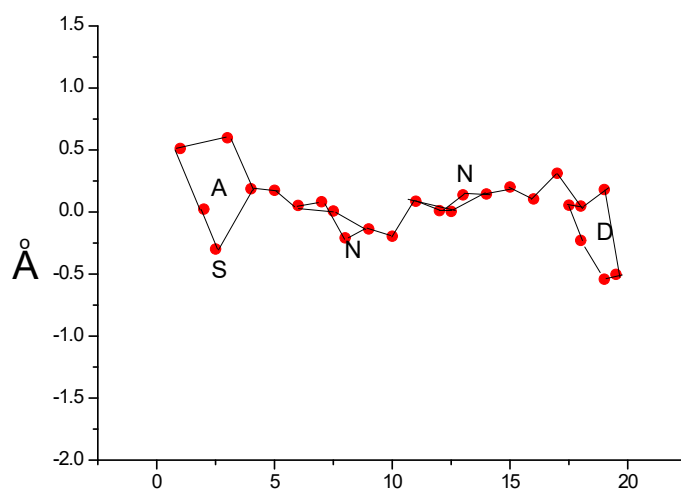

**Figure S7.** (a) Selected distances (Å) between a specific atom and the mean plane (C5, C10, C15, and C19). (b) The mean plane deviation diagram of **3a**. Atoms in red denote the atoms below the mean plane and atoms above the mean plane are highlighted in black.

(a)

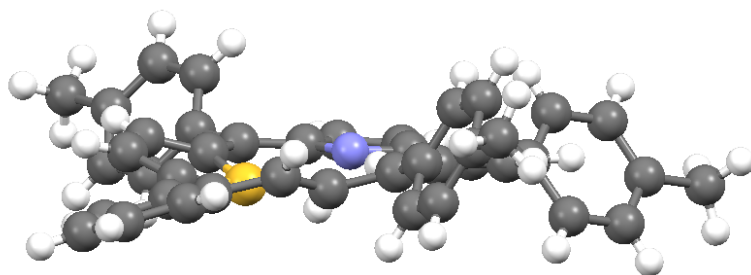

(b)

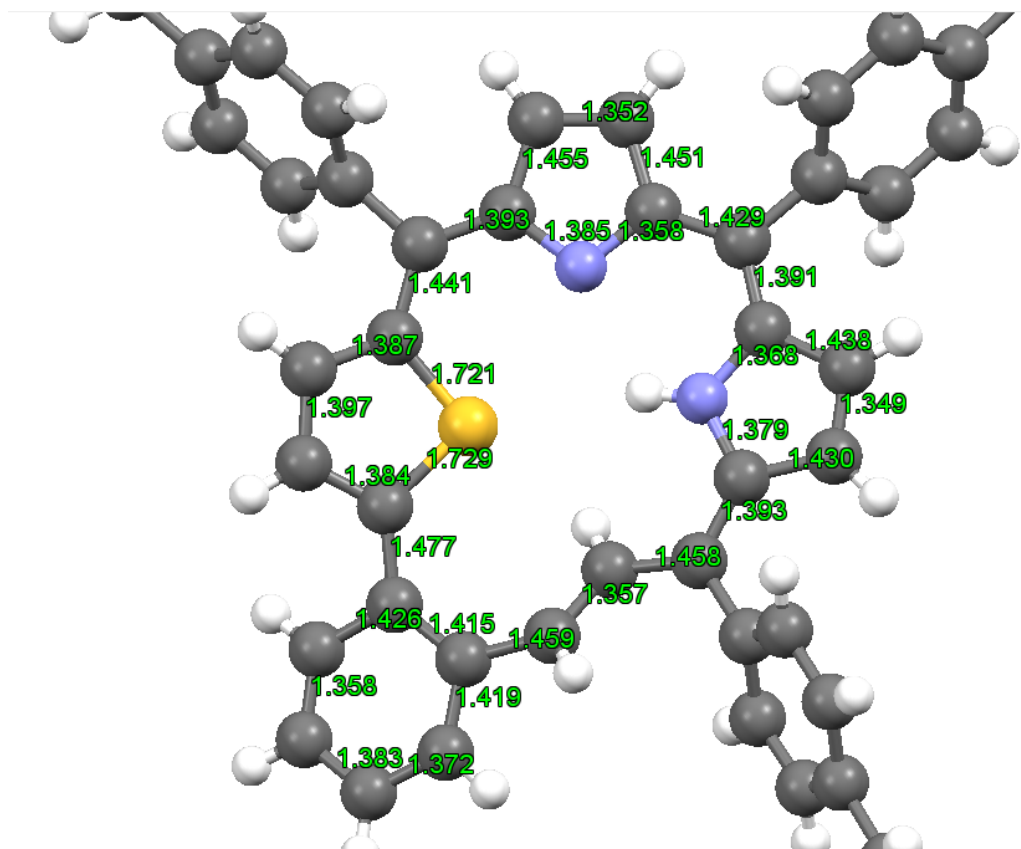

**Figure S8.** (a) Side view and (b) bond lengths (Å) of 3a

(a)

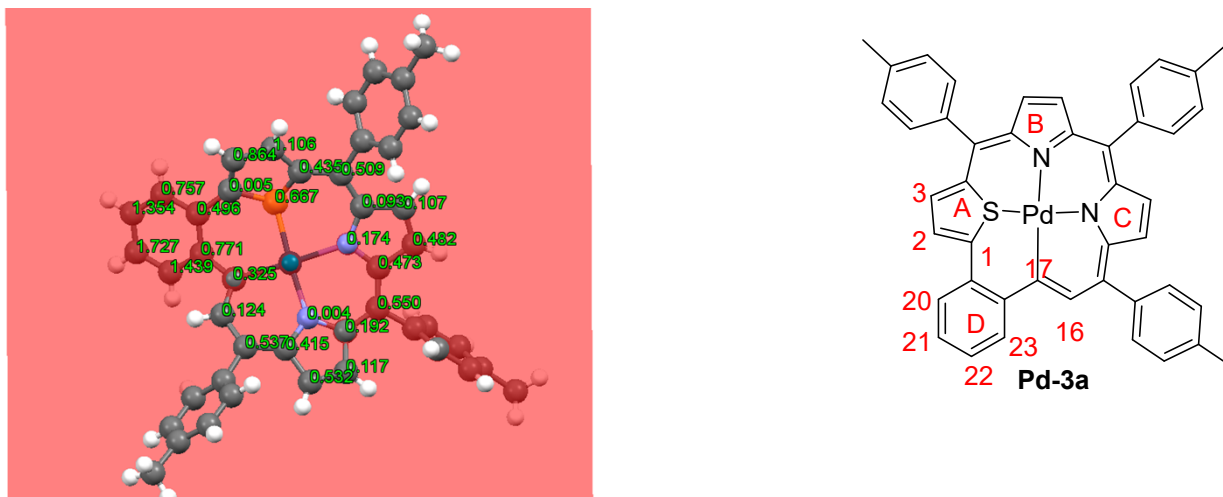

(b)

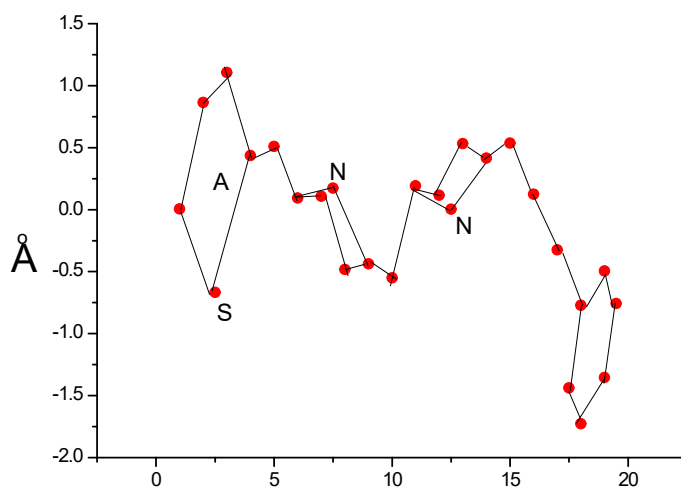

**Figure S9.** (a) Selected distances (Å) between a specific atom and the mean plane (C5, C10, C15, and C19). (b) The mean plane deviation diagram of **Pd-3a**. Atoms in red denote the atoms below the mean plane and atoms above the mean plane are highlighted in black.

(a)

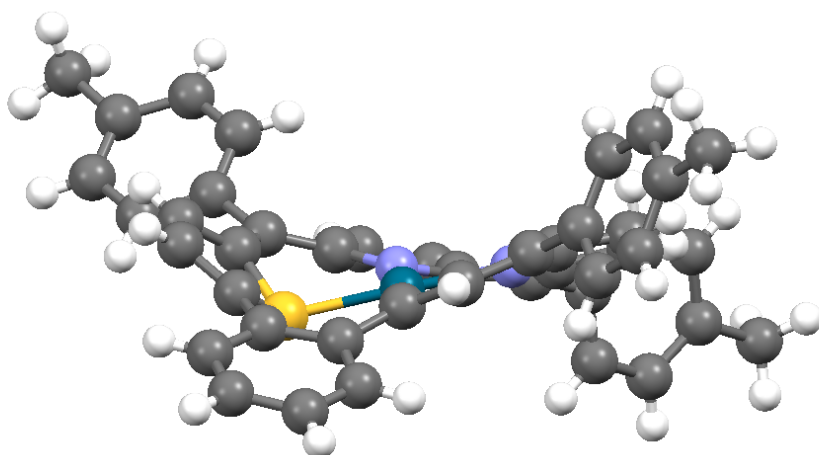

(b)

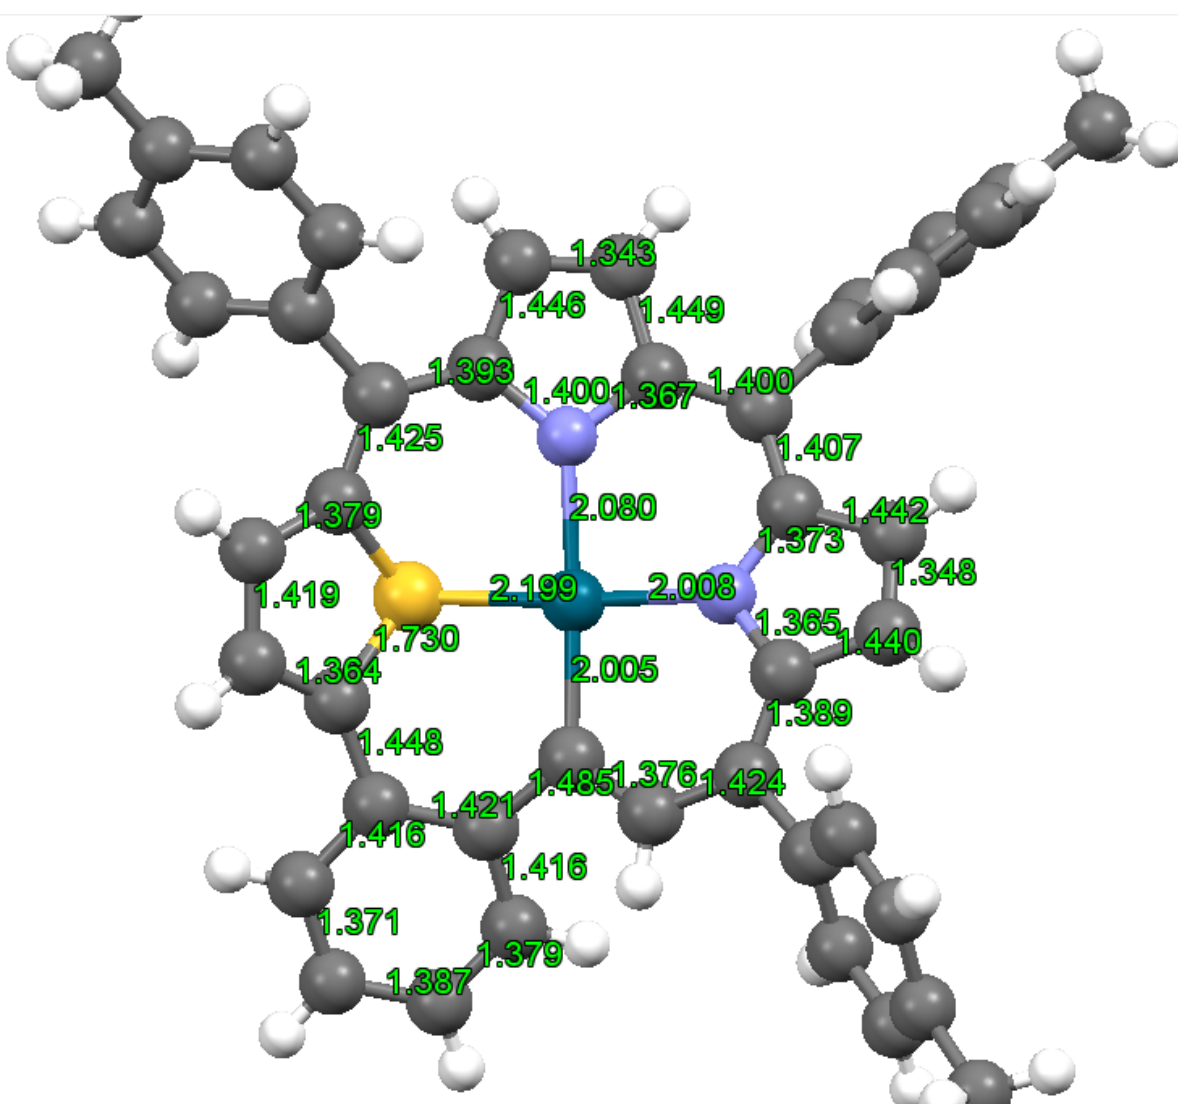

**Figure S10.** (a) Side view and (b) bond lengths (Å) of Pd-3a



(a)

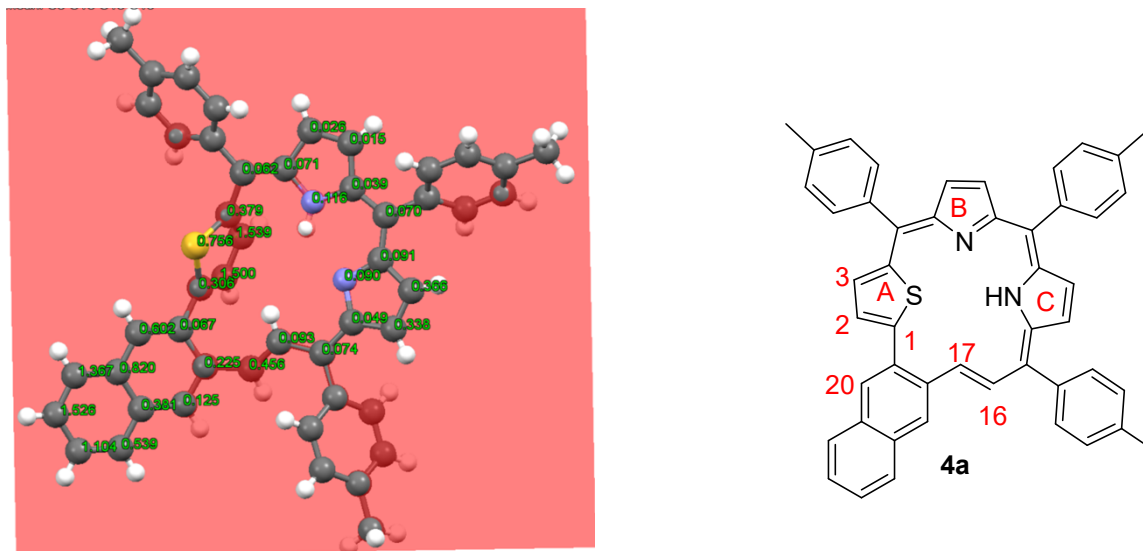

(b)

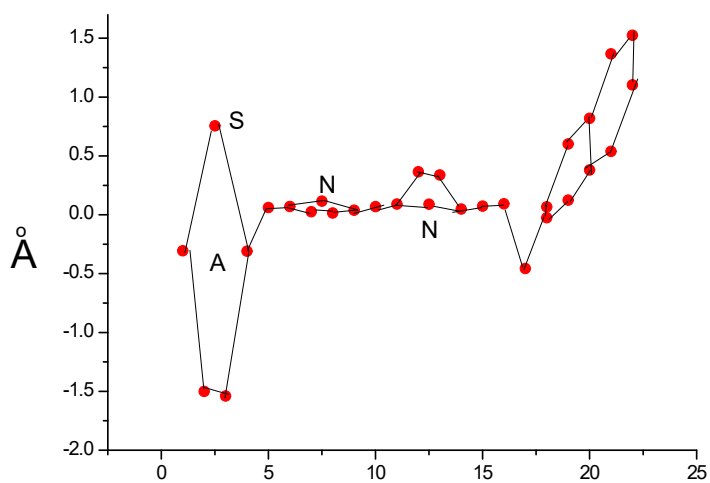

**Figure S11.** (a) Selected distances (Å) between a specific atom and the mean plane (C5, C10, C15, and C19). (b) The mean plane deviation diagram of **4a**. Atoms in red denote the atoms below the mean plane and atoms above the mean plane are highlighted in black.

(a)

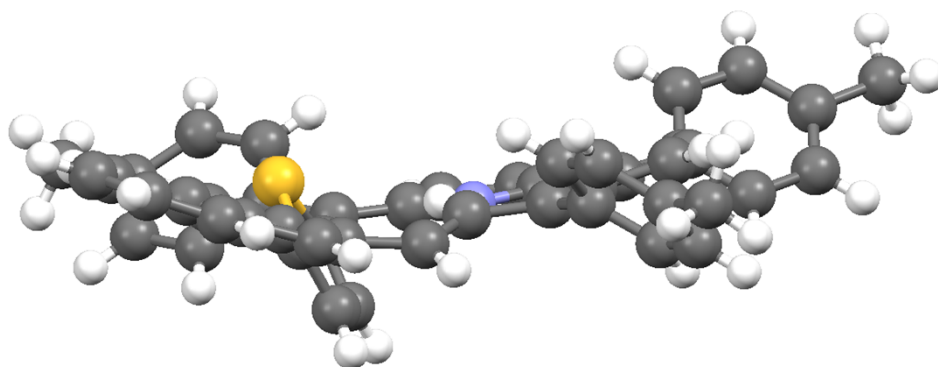

(b)

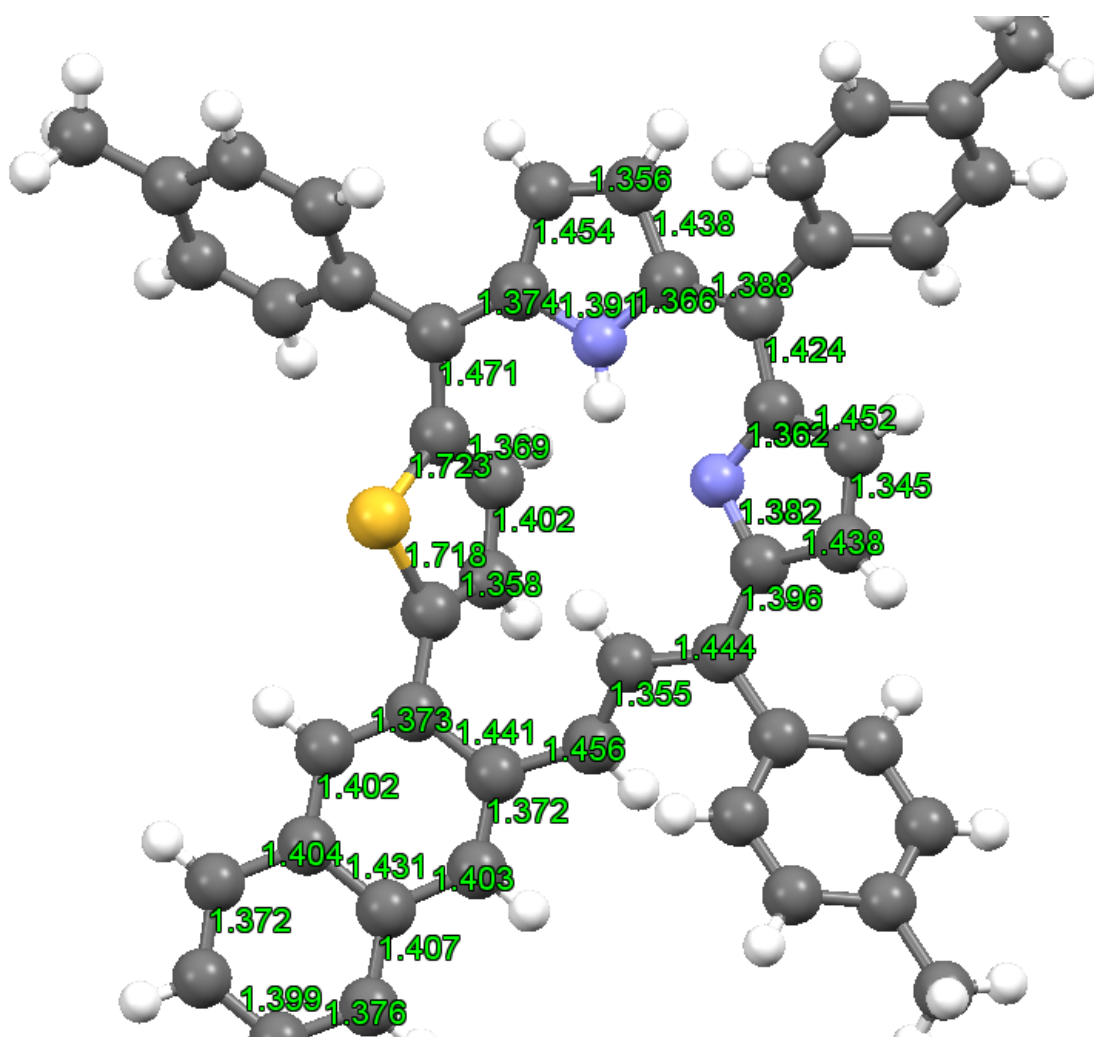

**Figure S12.** (a) Side view and (b) bond lengths (Å) of **4a**

## X-ray structural data of 4a

**Table S1.** Crystal data and structure refinement for **4a**

|                                   |                                                  |                  |
|-----------------------------------|--------------------------------------------------|------------------|
| Empirical formula                 | C <sub>48</sub> H <sub>36</sub> N <sub>2</sub> S |                  |
| Formula weight                    | 672.85                                           |                  |
| Temperature                       | 223(2) K                                         |                  |
| Wavelength                        | 1.54178 Å                                        |                  |
| Crystal system                    | Monoclinic                                       |                  |
| Space group                       | P2 <sub>1</sub> /n                               |                  |
| Unit cell dimensions              | a = 13.9249(5) Å                                 | a = 90°.         |
|                                   | b = 18.8546(7) Å                                 | b = 117.135(2)°. |
|                                   | c = 15.0205(6) Å                                 | g = 90°.         |
| Volume                            | 3509.6(2) Å <sup>3</sup>                         |                  |
| Z                                 | 4                                                |                  |
| Density (calculated)              | 1.273 Mg/m <sup>3</sup>                          |                  |
| Absorption coefficient            | 1.100 mm <sup>-1</sup>                           |                  |
| F(000)                            | 1416                                             |                  |
| Crystal size                      | 0.080 x 0.075 x 0.035 mm <sup>3</sup>            |                  |
| Theta range for data collection   | 3.591 to 71.066°.                                |                  |
| Index ranges                      | -16 ≤ h ≤ 16, -23 ≤ k ≤ 20, -17 ≤ l ≤ 16         |                  |
| Reflections collected             | 26806                                            |                  |
| Independent reflections           | 6438 [R(int) = 0.1092]                           |                  |
| Completeness to theta = 67.679°   | 97.7 %                                           |                  |
| Absorption correction             | Semi-empirical from equivalents                  |                  |
| Max. and min. transmission        | 0.7534 and 0.6097                                |                  |
| Refinement method                 | Full-matrix least-squares on F <sup>2</sup>      |                  |
| Data / restraints / parameters    | 6438 / 0 / 464                                   |                  |
| Goodness-of-fit on F <sup>2</sup> | 0.958                                            |                  |
| Final R indices [I > 2σ(I)]       | R1 = 0.0691, wR2 = 0.1672                        |                  |
| R indices (all data)              | R1 = 0.1715, wR2 = 0.2358                        |                  |
| Extinction coefficient            | 0.0007(2)                                        |                  |
| Largest diff. peak and hole       | 0.248 and -0.321 e.Å <sup>-3</sup>               |                  |

## 4. DFT, NICS, and HOMA Calculations

### Calculation Details

All density functional theory (DFT) calculations were performed with a Gaussian 09 program package. Calculations for structural optimizations and frequency calculation were carried out using the density functional theory (DFT) method with Becke's three-parameter hybrid exchange functionals and the Lee-Yang-Parr correlation functional (B3LYP) employing the 631LAN basis set. The 631LAN bases set is composed of 6-31G\*\* for carbon, hydrogen, nitrogen, sulfur and LANL2DZ for palladium metal atoms. Initial structures for ground state were constructed based on the X-ray crystal structures. Ground state geometries were verified by the frequency calculations, where no imaginary frequency was found.

### References

- (1) Gaussian 09, Revision D.01, M. J. Frisch, G. W. Trucks, H. B. Schlegel, G. E. Scuseria, M. A. Robb, J. R. Cheeseman, G. Scalmani, V. Barone, B. Mennucci, G. A. Petersson, H. Nakatsuji, M. Caricato, X. Li, H. P. Hratchian, A. F. Izmaylov, J. Bloino, G. Zheng, J. L. Sonnenberg, M. Hada, M. Ehara, K. Toyota, R. Fukuda, J. Hasegawa, M. Ishida, T. Nakajima, Y. Honda, O. Kitao, H. Nakai, T. Vreven, J. A. Montgomery, Jr., J. E. Peralta, F. Ogliaro, M. Bearpark, J. J. Heyd, E. Brothers, K. N. Kudin, V. N. Staroverov, R. Kobayashi, J. Normand, K. Raghavachari, A. Rendell, J. C. Burant, S. S. Iyengar, J. Tomasi, M. Cossi, N. Rega, J. M. Millam, M. Klene, J. E. Knox, J. B. Cross, V. Bakken, C. Adamo, J. Jaramillo, R. Gomperts, R. E. Stratmann, O. Yazyev, A. J. Austin, R. Cammi, C. Pomelli, J. W. Ochterski, R. L. Martin, K. Morokuma, V. G. Zakrzewski, G. A. Voth, P. Salvador, J. J. Dannenberg, S. Dapprich, A. D. Daniels, Ö. Farkas, J. B. Foresman, J. V. Ortiz, J. Cioslowski, and D. J. Fox, Gaussian, Inc., Wallingford CT, 2009.

## NICS (0) Calculations

With the DFT-optimized structures, Nucleus-Independent Chemical Shift (NICS) calculations were carried. The calculated NICS (0) values of all conformations ( $\delta_{i,\text{calc}}$ ) in the center of them were averaged by introducing a normalized Boltzmann factor as follows:

$$p_i = \exp(-\Delta G_i/RT) / \sum \exp(-\Delta G_i/RT)$$

$$\langle \delta_{\text{calc}} \rangle = \sum p_i \cdot \delta_{i,\text{calc}}$$

**Table S2.** Average NICS (0) values ( $\langle \delta_{\text{calc}} \rangle$ ) of **3a**, **3b**, **4a**, and **4b**

|           |                      | <b>x<sub>1</sub></b> | <b>x<sub>2</sub></b> | <b>x<sub>3</sub></b> | <b>x<sub>4</sub></b> | <b>x<sub>5</sub></b> | <b>x<sub>6</sub></b> | <b>x<sub>7</sub></b> | <b>x<sub>8</sub></b> | $\langle \delta_{\text{calc}} \rangle$ |
|-----------|----------------------|----------------------|----------------------|----------------------|----------------------|----------------------|----------------------|----------------------|----------------------|----------------------------------------|
| <b>3a</b> | $\delta_i$           | -7.19                | -6.71                | -6.44                | -4.76                | -9.63                | - <sup>a</sup>       | - <sup>b</sup>       | -8.11                |                                        |
|           | $p_i$                | 0.0415               | 0.1786               | 0.6317               | 0.0068               | 0.1407               |                      |                      | 0.0007               |                                        |
|           | $p_i \cdot \delta_i$ | -0.2986              | -1.1977              | -4.0707              | -0.0325              | -1.3543              |                      |                      | -0.0054              | -6.96                                  |
| <b>3b</b> | $\delta_i$           | -8.53                | -7.16                | -6.63                | -5.36                | -11.37               | -9.76                | - <sup>b</sup>       | -8.99                |                                        |
|           | $p_i$                | 0.0275               | 0.1298               | 0.3290               | 0.0039               | 0.4553               | 0.0531               |                      | 0.0014               |                                        |
|           | $p_i \cdot \delta_i$ | -0.2347              | -0.9288              | -2.1806              | -0.0210              | -5.1763              | -0.5179              |                      | -0.0126              | -9.07                                  |
| <b>4a</b> | $\delta_i$           | -3.96                | -4.71                | -4.46                | -1.72                | -5.98                | - <sup>a</sup>       | - <sup>b</sup>       | -4.89                |                                        |
|           | $p_i$                | 0.0086               | 0.1896               | 0.7587               | 0.0048               | 0.0379               |                      |                      | 0.0003               |                                        |
|           | $p_i \cdot \delta_i$ | -0.0341              | -0.8935              | -3.3871              | -0.0323              | -0.2267              |                      |                      | -0.0016              | -4.55                                  |
| <b>4b</b> | $\delta_i$           | -2.63                | -3.85                | -3.55                | -0.61                | -5.05                | - <sup>a</sup>       | - <sup>b</sup>       | -3.72                |                                        |
|           | $p_i$                | 0.0042               | 0.1809               | 0.7905               | 0.0040               | 0.0202               |                      |                      | 0.0002               |                                        |
|           | $p_i \cdot \delta_i$ | -0.0109              | -0.6956              | -2.8069              | -0.0024              | -0.1020              |                      |                      | -0.0008              | -3.62                                  |

<sup>a, b</sup> **3/4x<sub>6</sub>** and **3/4x<sub>7</sub>** are merged to **3/4x<sub>5</sub>** and **3/4x<sub>8</sub>**, respectively except **3b<sub>6</sub>** after the optimization.

## HOMA Calculations

With the DFT-optimized structures, Harmonic Oscillator Model of Aromaticity (HOMA) calculations were carried. The calculated HOMA values of all conformations ( $h_{i,\text{calc}}$ ) were averaged by introducing a normalized Boltzmann factor as follows:

$$p_i = \exp(-\Delta G_i/RT) / \sum \exp(-\Delta G_i/RT)$$

$$\langle h_{\text{calc}} \rangle = \sum p_i \cdot h_{i,\text{calc}}$$

**Table S3.** Average HOMA values ( $\langle h_{\text{calc}} \rangle$ ) of **3a**, **3b**, **4a**, and **4b**

|           |                 | <b>x<sub>1</sub></b> | <b>x<sub>2</sub></b> | <b>x<sub>3</sub></b> | <b>x<sub>4</sub></b> | <b>x<sub>5</sub></b> | <b>x<sub>6</sub></b> | <b>x<sub>7</sub></b> | <b>x<sub>8</sub></b> | $\langle h_{\text{calc}} \rangle$ |
|-----------|-----------------|----------------------|----------------------|----------------------|----------------------|----------------------|----------------------|----------------------|----------------------|-----------------------------------|
| <b>3a</b> | $h_i$           | 0.58                 | 0.55                 | 0.51                 | 0.53                 | 0.63                 | - <sup>a</sup>       | - <sup>b</sup>       | 0.60                 |                                   |
|           | $p_i$           | 0.0415               | 0.1786               | 0.6317               | 0.0068               | 0.1407               |                      |                      | 0.0007               |                                   |
|           | $p_i \cdot h_i$ | 0.0241               | 0.0975               | 0.3253               | 0.0036               | 0.0881               |                      |                      | 0.0004               | 0.54                              |
| <b>3b</b> | $h_i$           | 0.60                 | 0.56                 | 0.53                 | 0.55                 | 0.68                 | 0.67                 | - <sup>b</sup>       | 0.65                 |                                   |
|           | $p_i$           | 0.0275               | 0.1298               | 0.329                | 0.0039               | 0.4553               | 0.0531               |                      | 0.0014               |                                   |
|           | $p_i \cdot h_i$ | 0.0166               | 0.0727               | 0.1743               | 0.0021               | 0.3112               | 0.0353               |                      | 0.0009               | 0.61                              |
| <b>4a</b> | $h_i$           | 0.49                 | 0.49                 | 0.46                 | 0.43                 | 0.53                 | - <sup>a</sup>       | - <sup>b</sup>       | 0.50                 |                                   |
|           | $p_i$           | 0.0086               | 0.1896               | 0.7587               | 0.0048               | 0.0379               |                      |                      | 0.0003               |                                   |
|           | $p_i \cdot h_i$ | 0.0042               | 0.0926               | 0.3467               | 0.0021               | 0.0202               |                      |                      | 0.0002               | 0.47                              |
| <b>4b</b> | $h_i$           | 0.46                 | 0.46                 | 0.43                 | 0.40                 | 0.50                 | - <sup>a</sup>       | - <sup>b</sup>       | 0.47                 |                                   |
|           | $p_i$           | 0.0042               | 0.1809               | 0.7905               | 0.004                | 0.0202               |                      |                      | 0.0002               |                                   |
|           | $p_i \cdot h_i$ | 0.0019               | 0.0835               | 0.3396               | 0.0016               | 0.0100               |                      |                      | 0.0001               | 0.44                              |

<sup>a, b</sup> **3/4x<sub>6</sub>** and **3/4x<sub>7</sub>** are merged to **3/4x<sub>5</sub>** and **3/4x<sub>8</sub>**, respectively except **3b<sub>6</sub>** after the optimization.

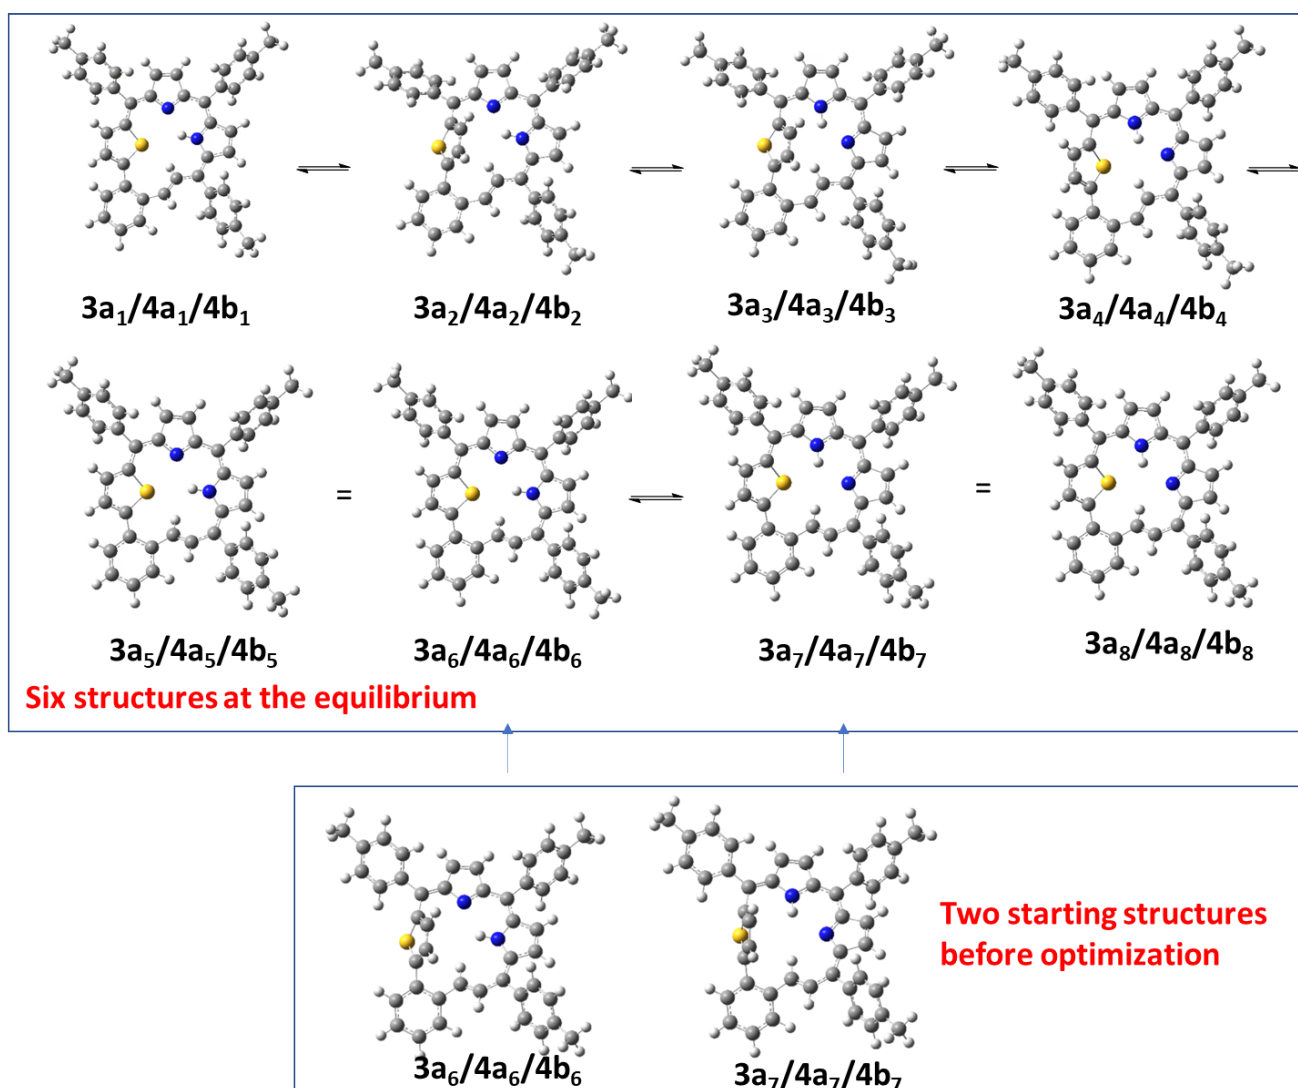

**Figure S13.** Equilibrium structures of **3a/4a/4b** obtained from DFT optimization. The initial set of eight structures was optimized using density functional theory (DFT), resulting in six possible equilibrium structures.

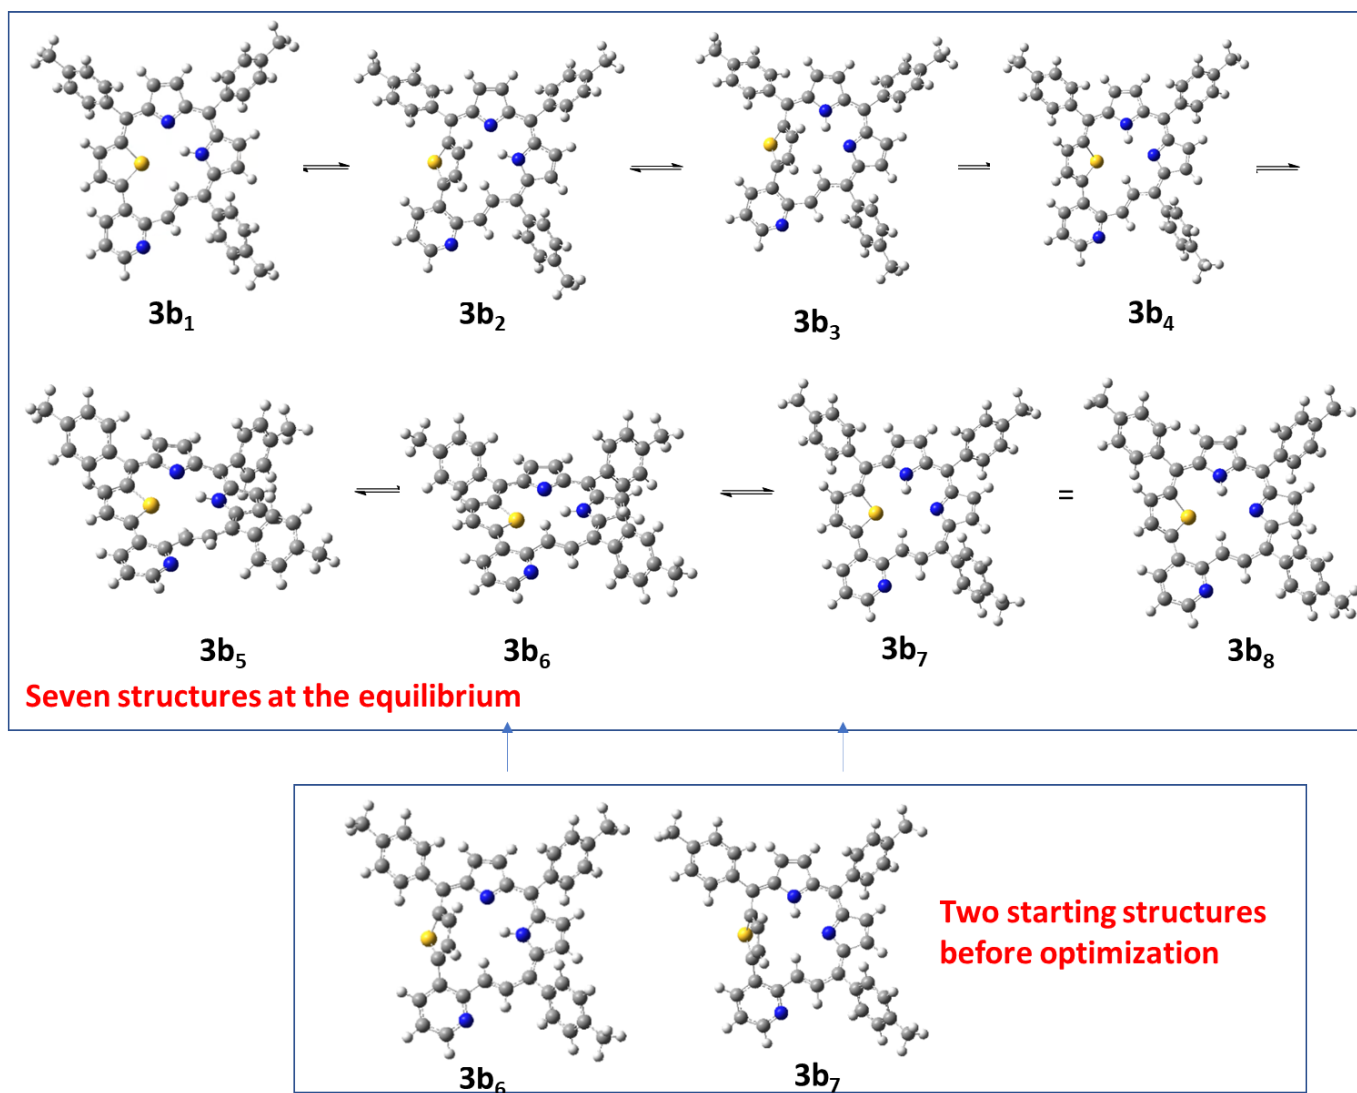

**Figure S14.** Equilibrium structures of **3b** obtained from DFT optimization. The initial set of eight structures was optimized using density functional theory (DFT), resulting in seven possible equilibrium structures.



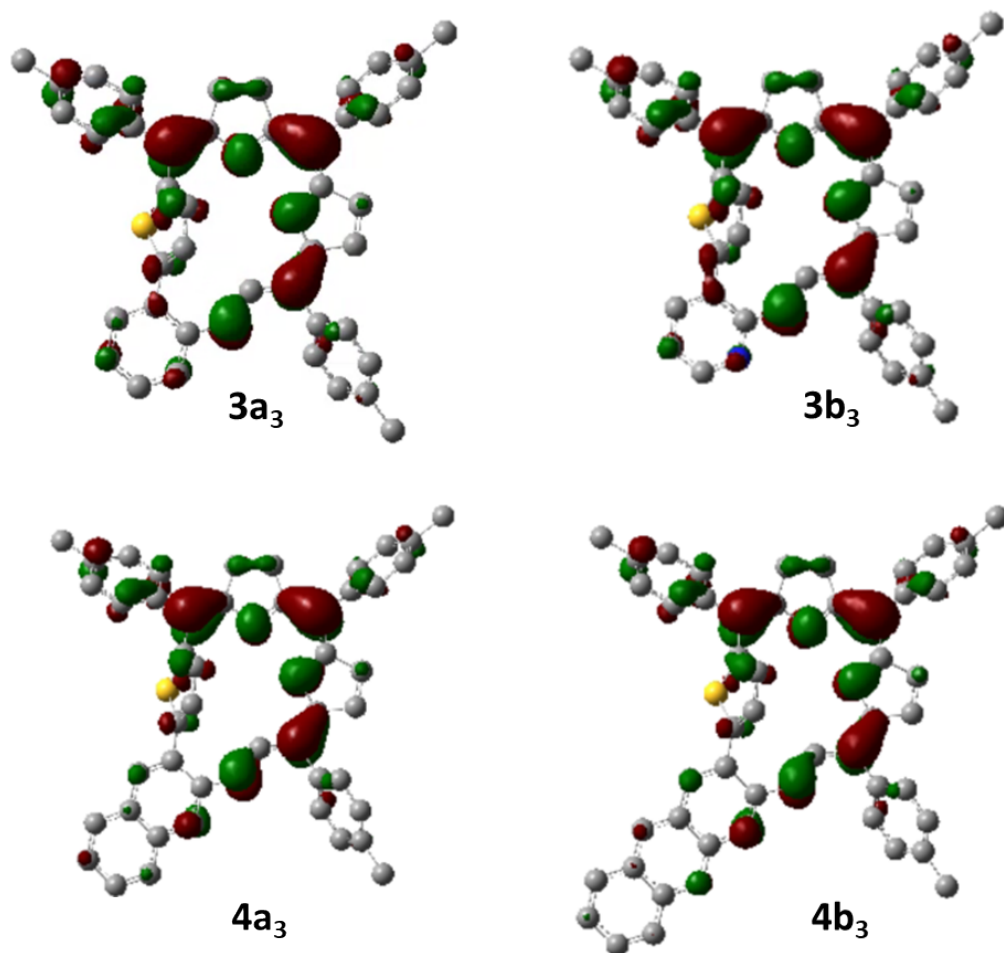

**Figure S15.** DFT-calculated HOMO of **3a<sub>3</sub>**, **3b<sub>3</sub>**, **4a<sub>3</sub>**, and **4b<sub>3</sub>** (isovalue = 0.03 e/Å<sup>3</sup>). Hydrogen atoms are omitted for clarity.

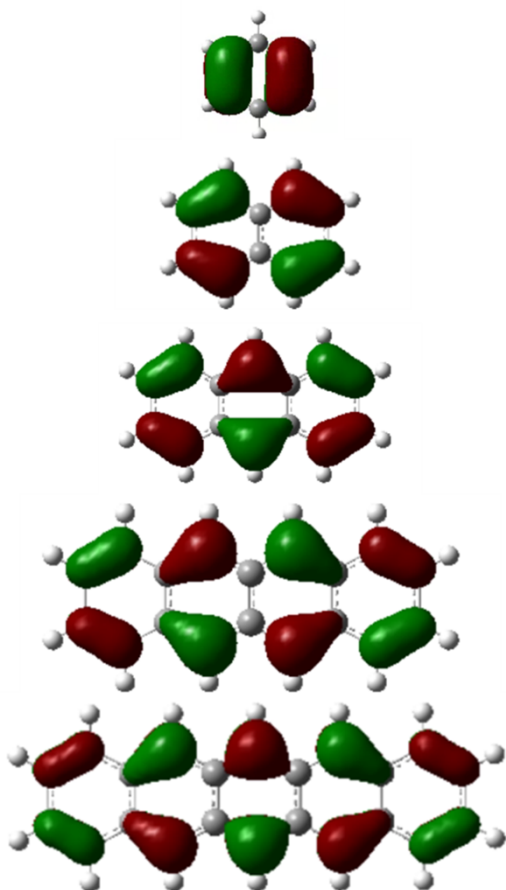

**Figure S16.** Comparison of the highest occupied molecular orbital (HOMO) of benzene and various polycyclic aromatic hydrocarbons (PAHs). This figure illustrates that the electron density of the HOMOs is highest at the centers of the PAH molecules and lowest at their peripheries.

every local  
resonance structure  
(one  $\pi$ -sextet)

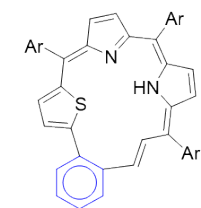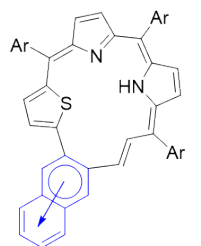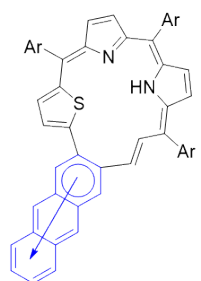

Every global resonance structure (no  $\pi$ -sextet)

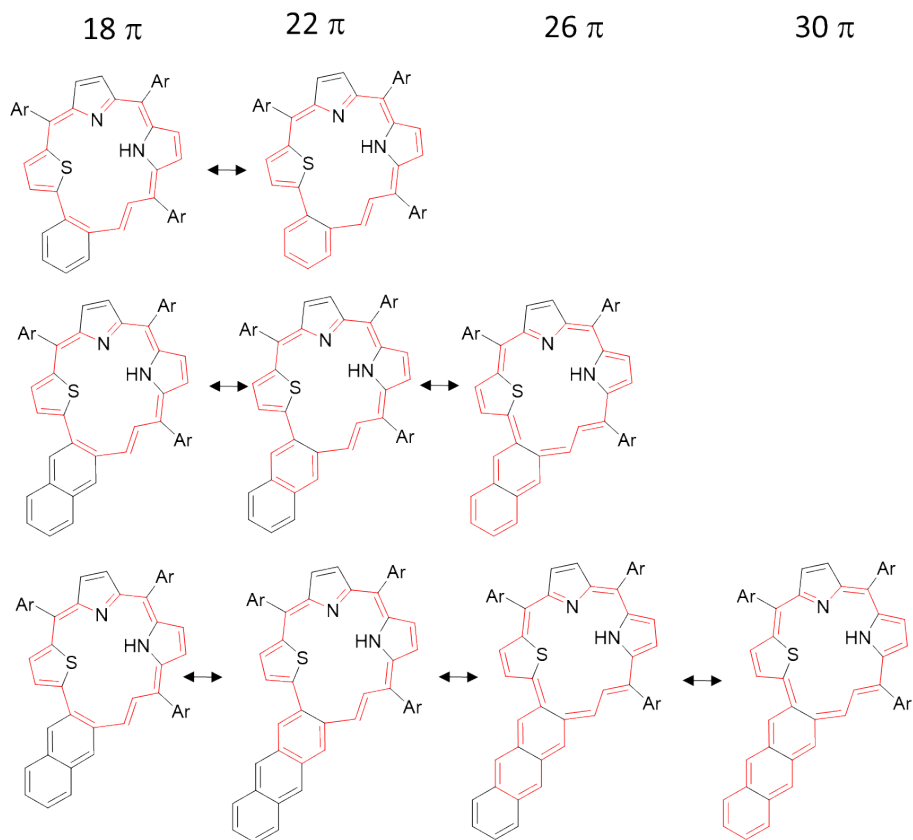

**Figure S17.** Possible global conjugation pathways (red line) of *o*-arene-connected porphyrins and their competing local pathway (blue line) of arenes such as benzene, naphthalene, and anthracene. Three different porphyrinoids have the same number of  $\pi$ -sextet for global and local pathways.

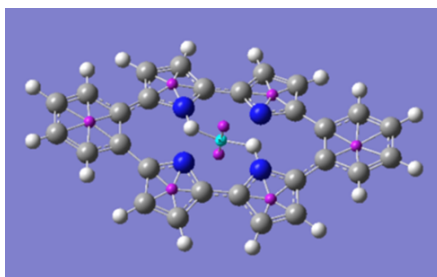

NICS(0) = -10.36

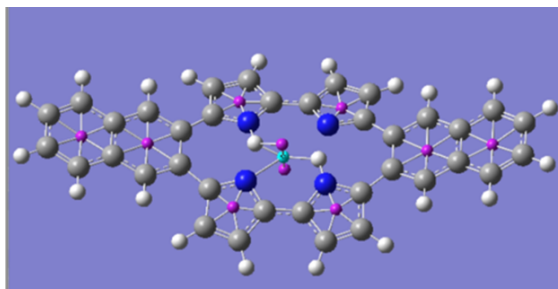

NICS(0) = -7.87

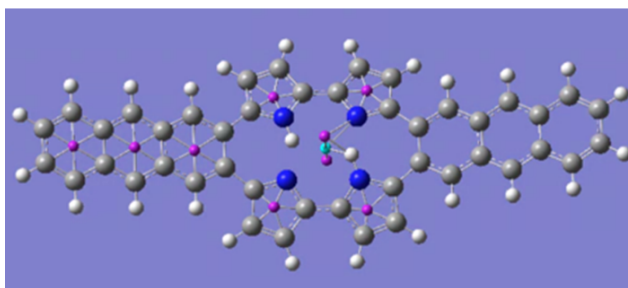

NICS(0) = -6.03

**Figure S18.** NICS (0) values of **9a**, **9b**, and **9c**

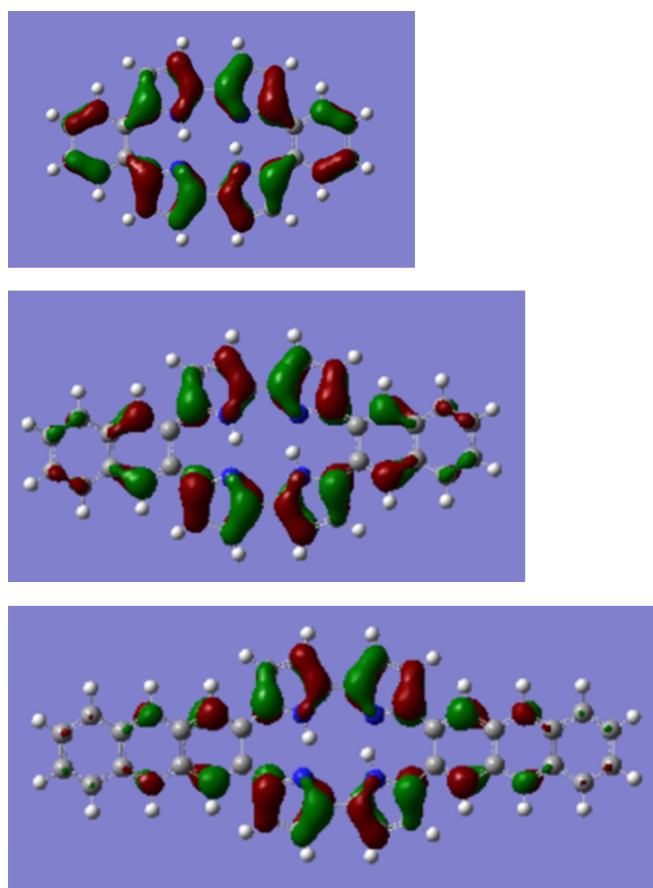

**Figure S19.** DFT-calculated HOMO of **9a**, **9b**, and **9c** (isovalue =  $0.03 \text{ e}/\text{\AA}^3$ )

## 5. HR-Mass Data

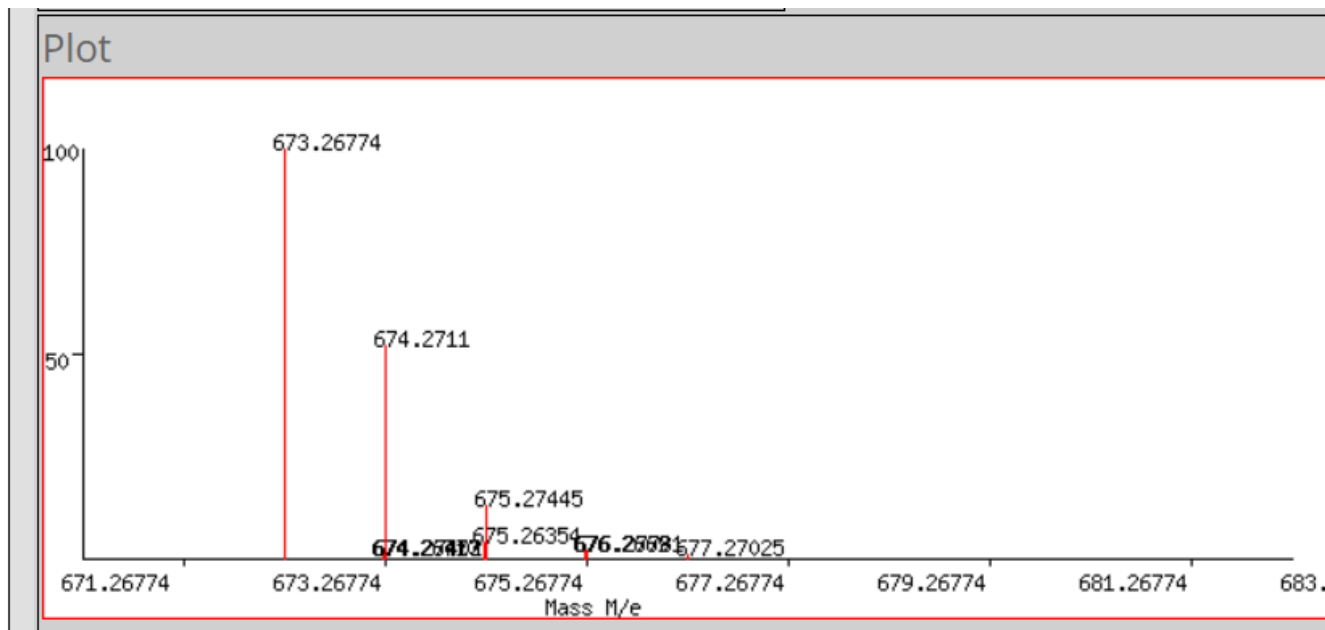

[ Mass Spectrum ]  
Data : sp4 Date : 06-Jul-2021 10:12  
Instrument : MStation  
Sample : -  
Inlet : Direct Ion Mode : FAB+  
Spectrum Type : Normal Ion [EF-Linear]

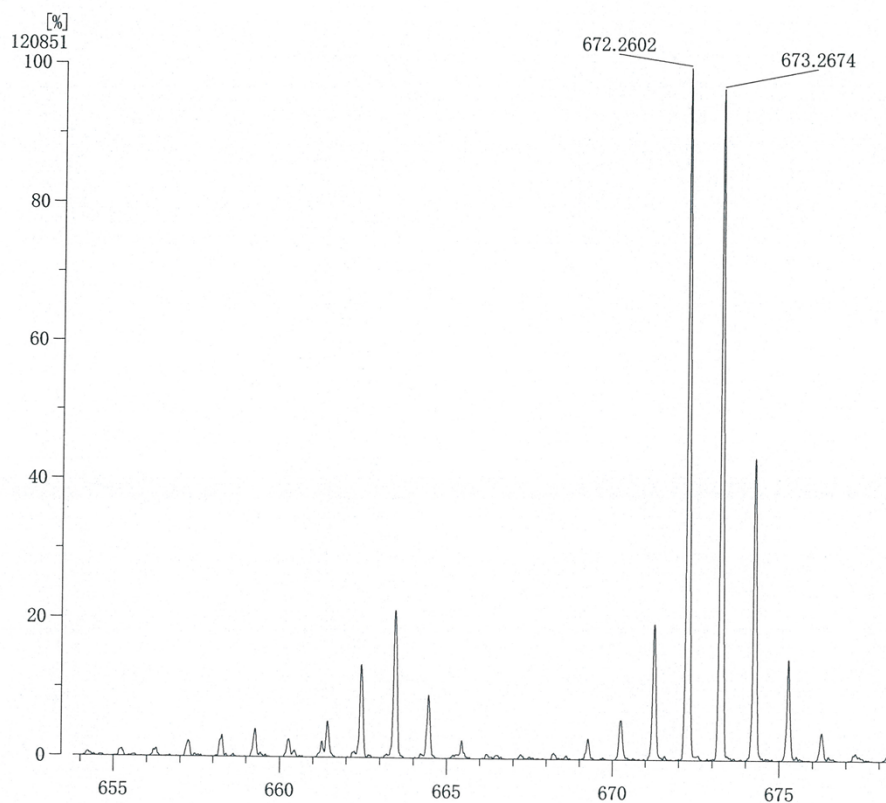

**Figure S20.** Theoretical and observed HRMS data of **4a** (HRMS (FAB):  $m/z$  calcd for  $C_{48}H_{37}N_2S$   $[M + H]^+$ : 673.2677; found: 673.2674)

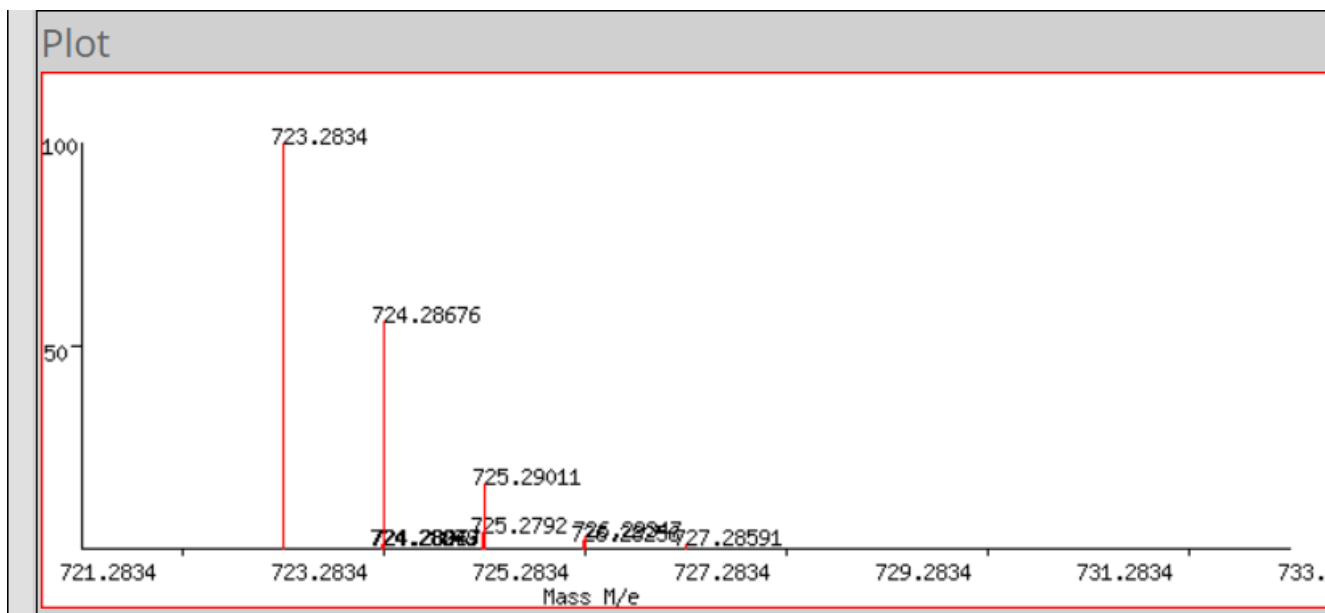

[ Mass Spectrum ]  
 Data : SP5\_HRFAB Date : 24-Jun-2021 09:45  
 Instrument : MStation  
 Sample : -  
 Inlet : Direct Ion Mode : FAB+  
 Spectrum Type : Normal Ion [EF-Linear]

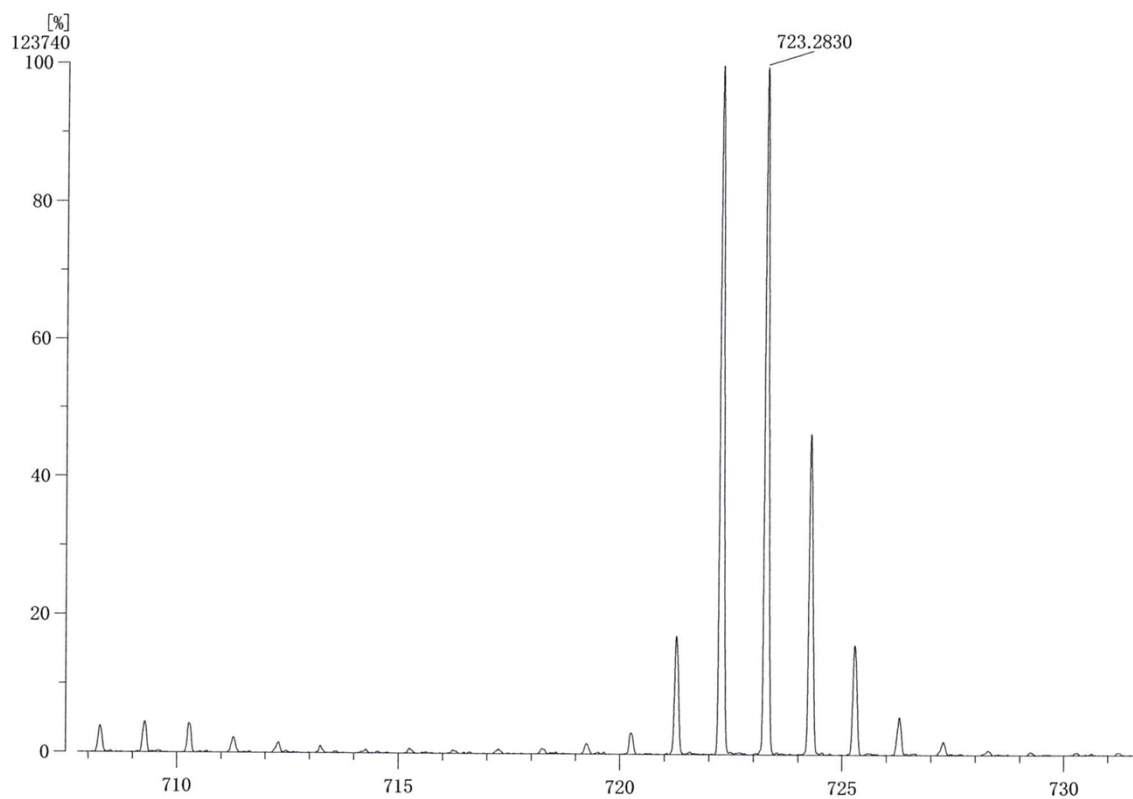

**Figure S21.** Theoretical and observed HRMS data of **4b** (HRMS (FAB):  $m/z$  calcd for  $C_{52}H_{39}N_2S [M + H]^+$ : 723.2834; found: 723.2830)

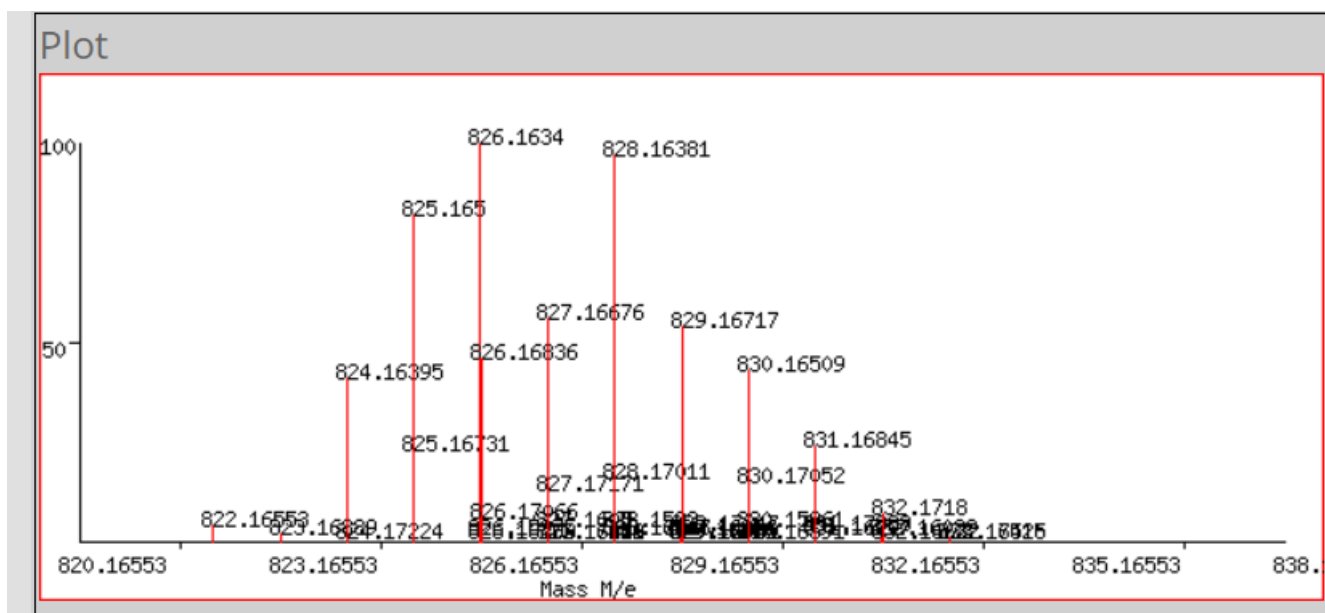

[ Mass Spectrum ]  
 Data : SP6\_HRFAB Date : 24-Jun-2021 09:53  
 Instrument : MStation  
 Sample : -  
 Inlet : Direct Ion Mode : FAB+  
 Spectrum Type : Normal Ion [EF-Linear]

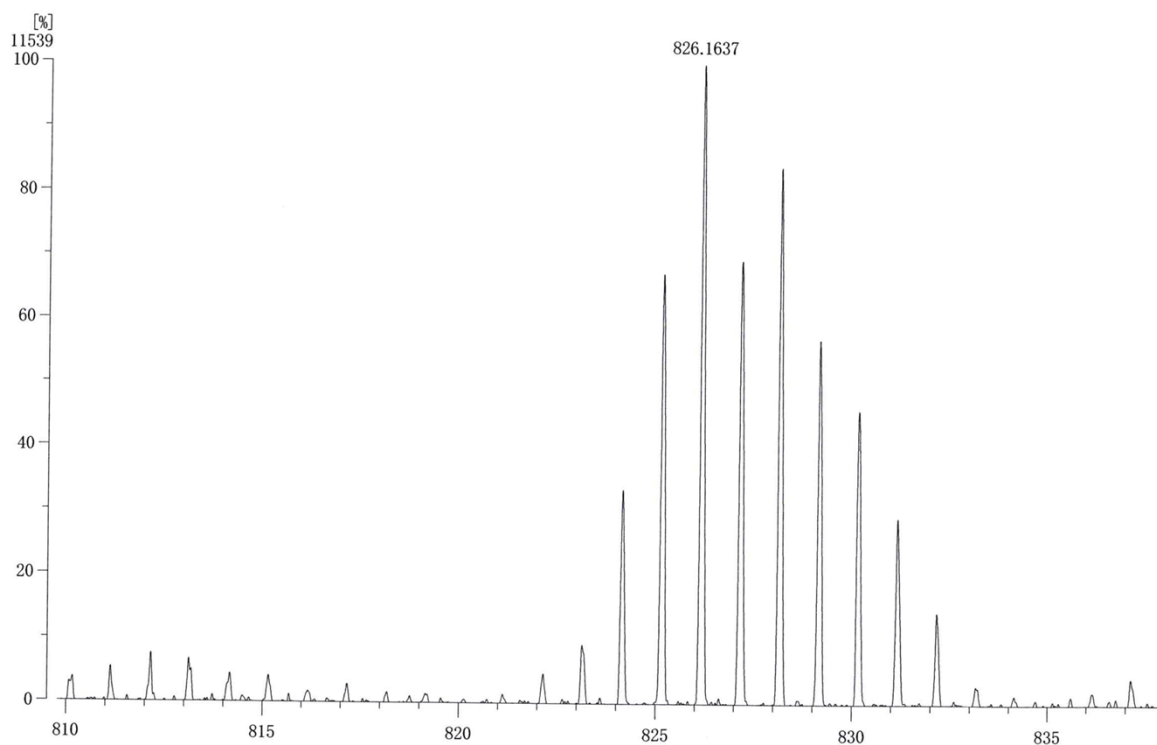

**Figure S22.** Theoretical and observed HRMS data of **Pd-4b** (HRMS (FAB): m/z calcd for  $[M]^+$   $C_{52}H_{36}N_2PdS$ : 826.1634; found: 826.1637)



## 6. NMR Spectra

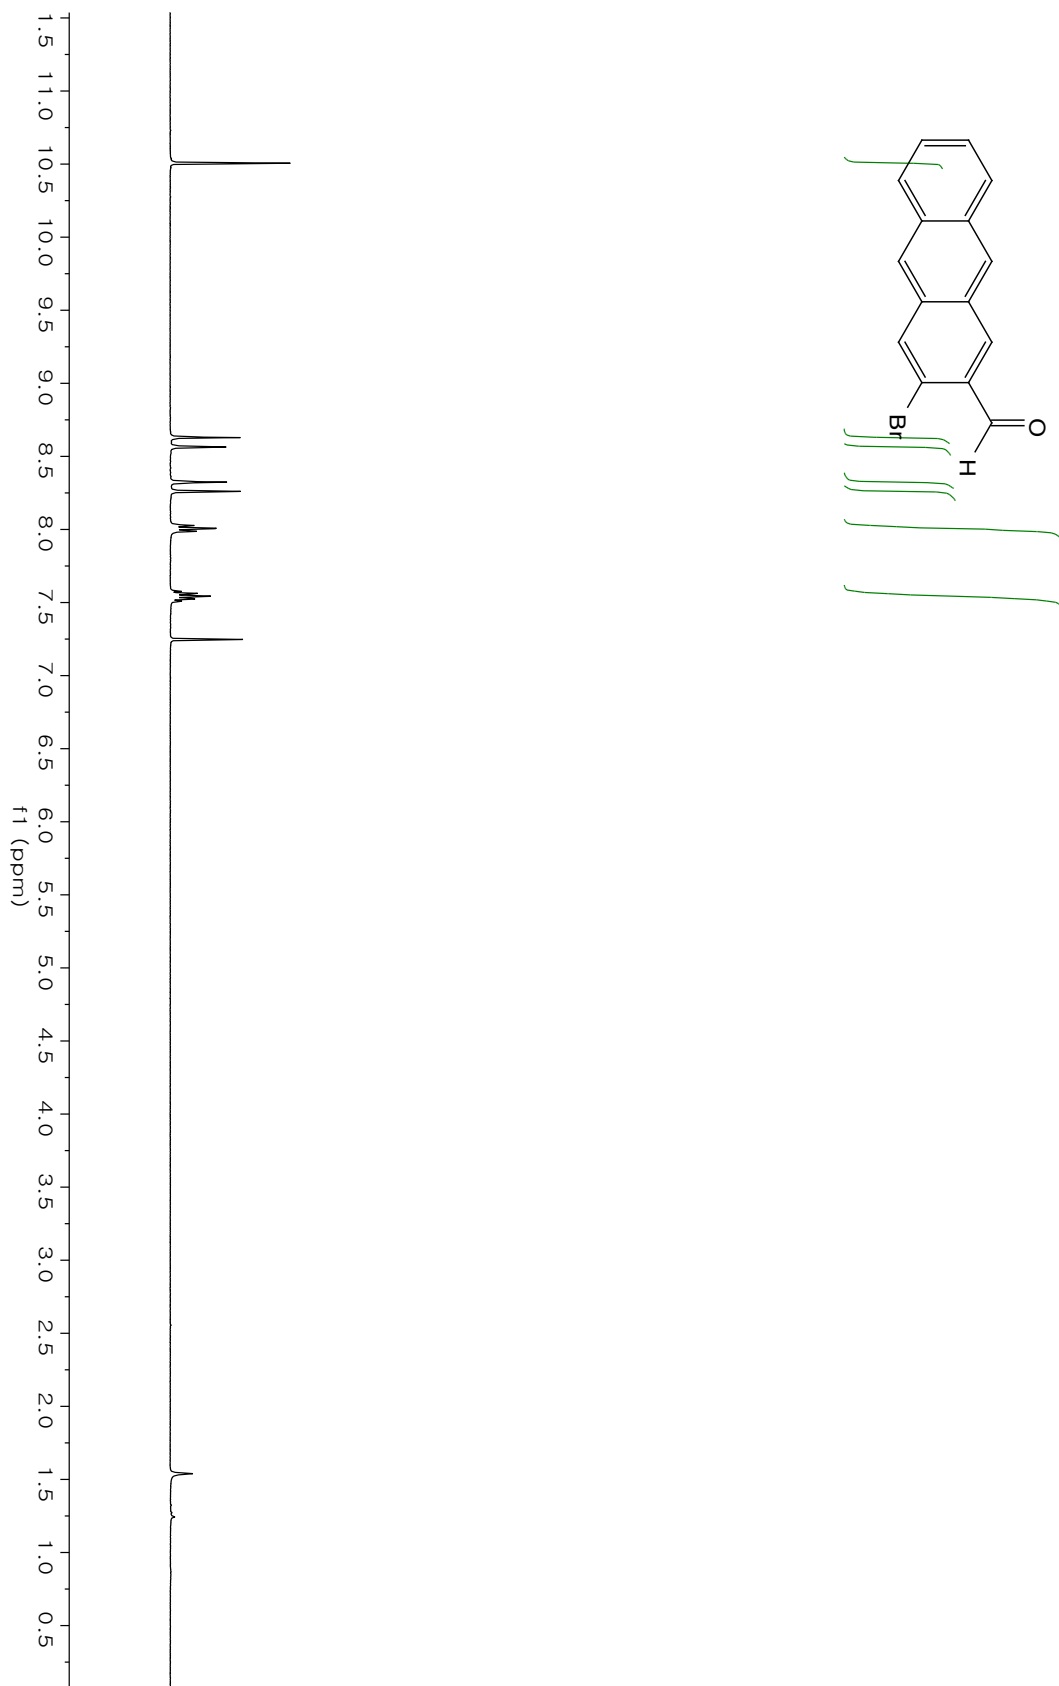

**Figure S23.**  $^1\text{H}$  NMR spectrum of **5b** recorded in  $\text{CDCl}_3$

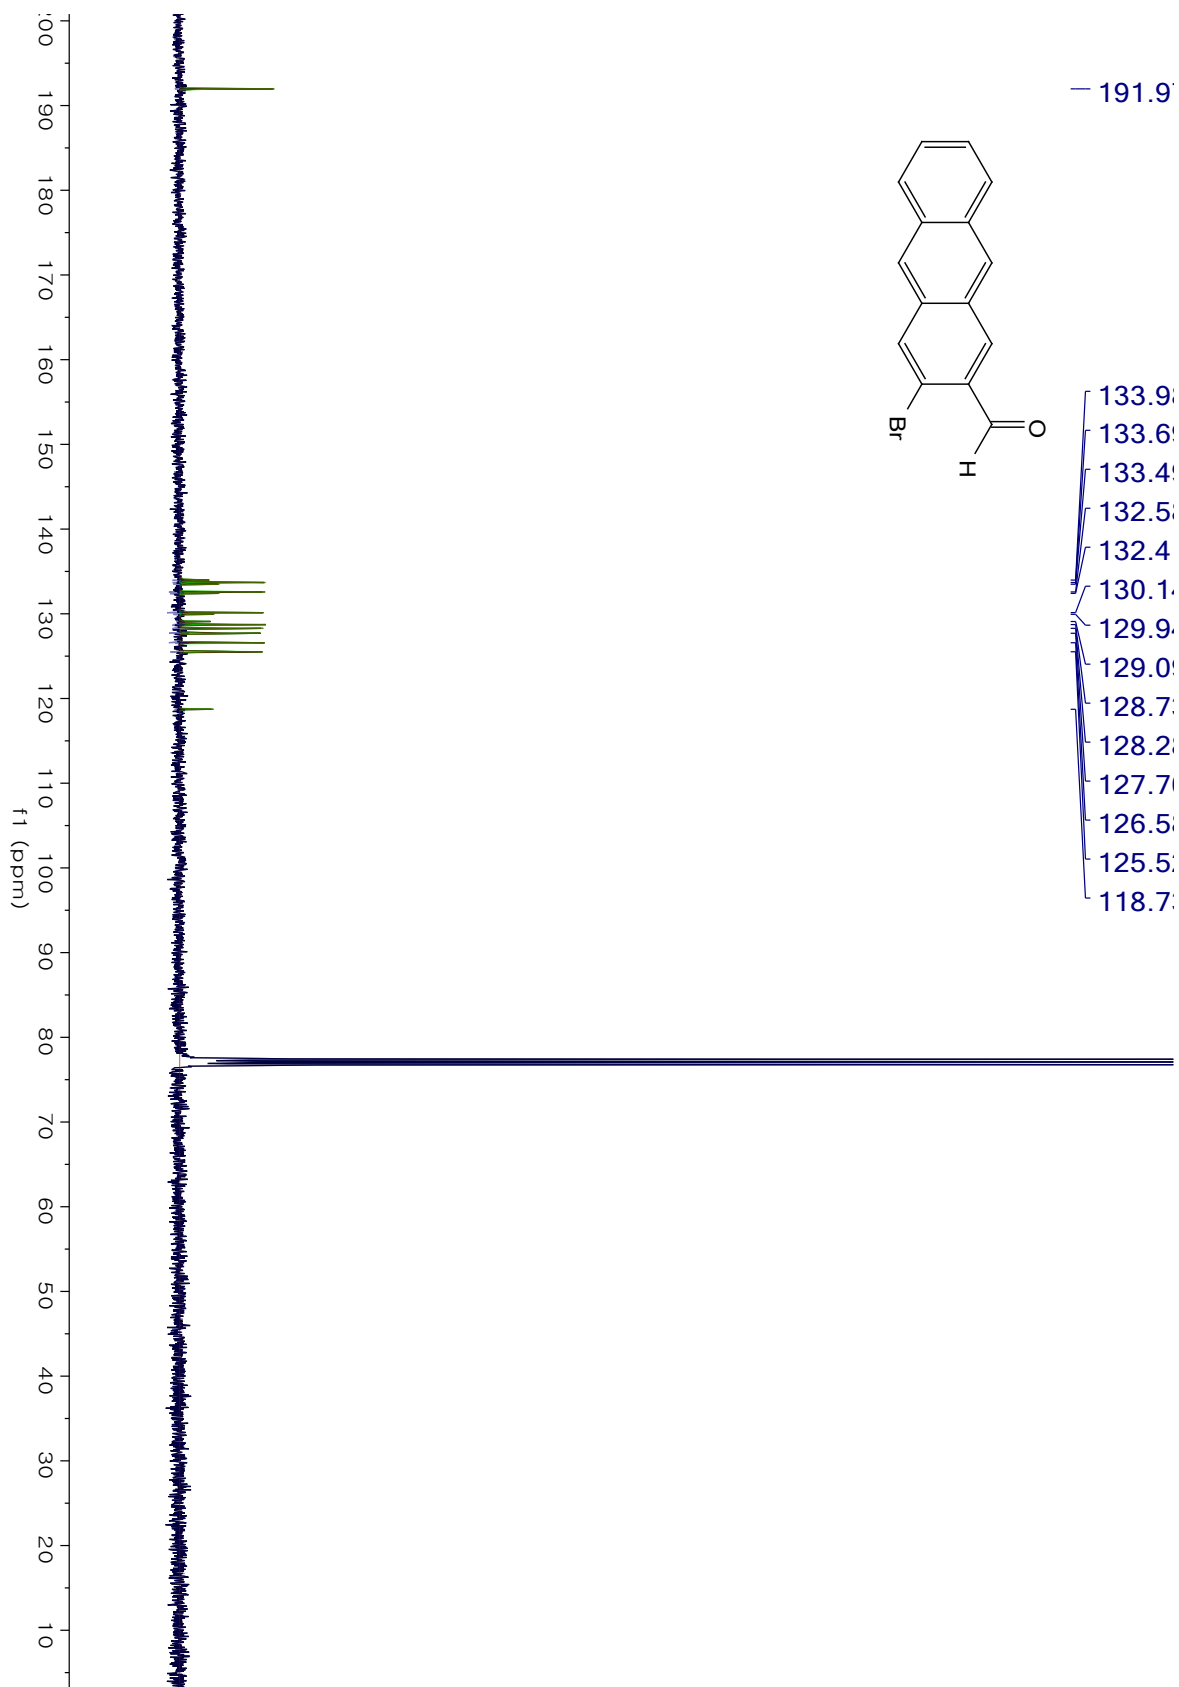

**Figure S24.**  $^{13}\text{C}$  NMR spectrum of **5b** recorded in  $\text{CDCl}_3$

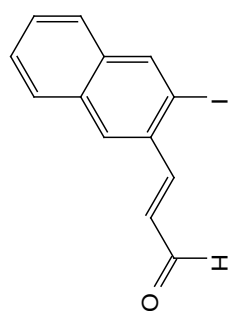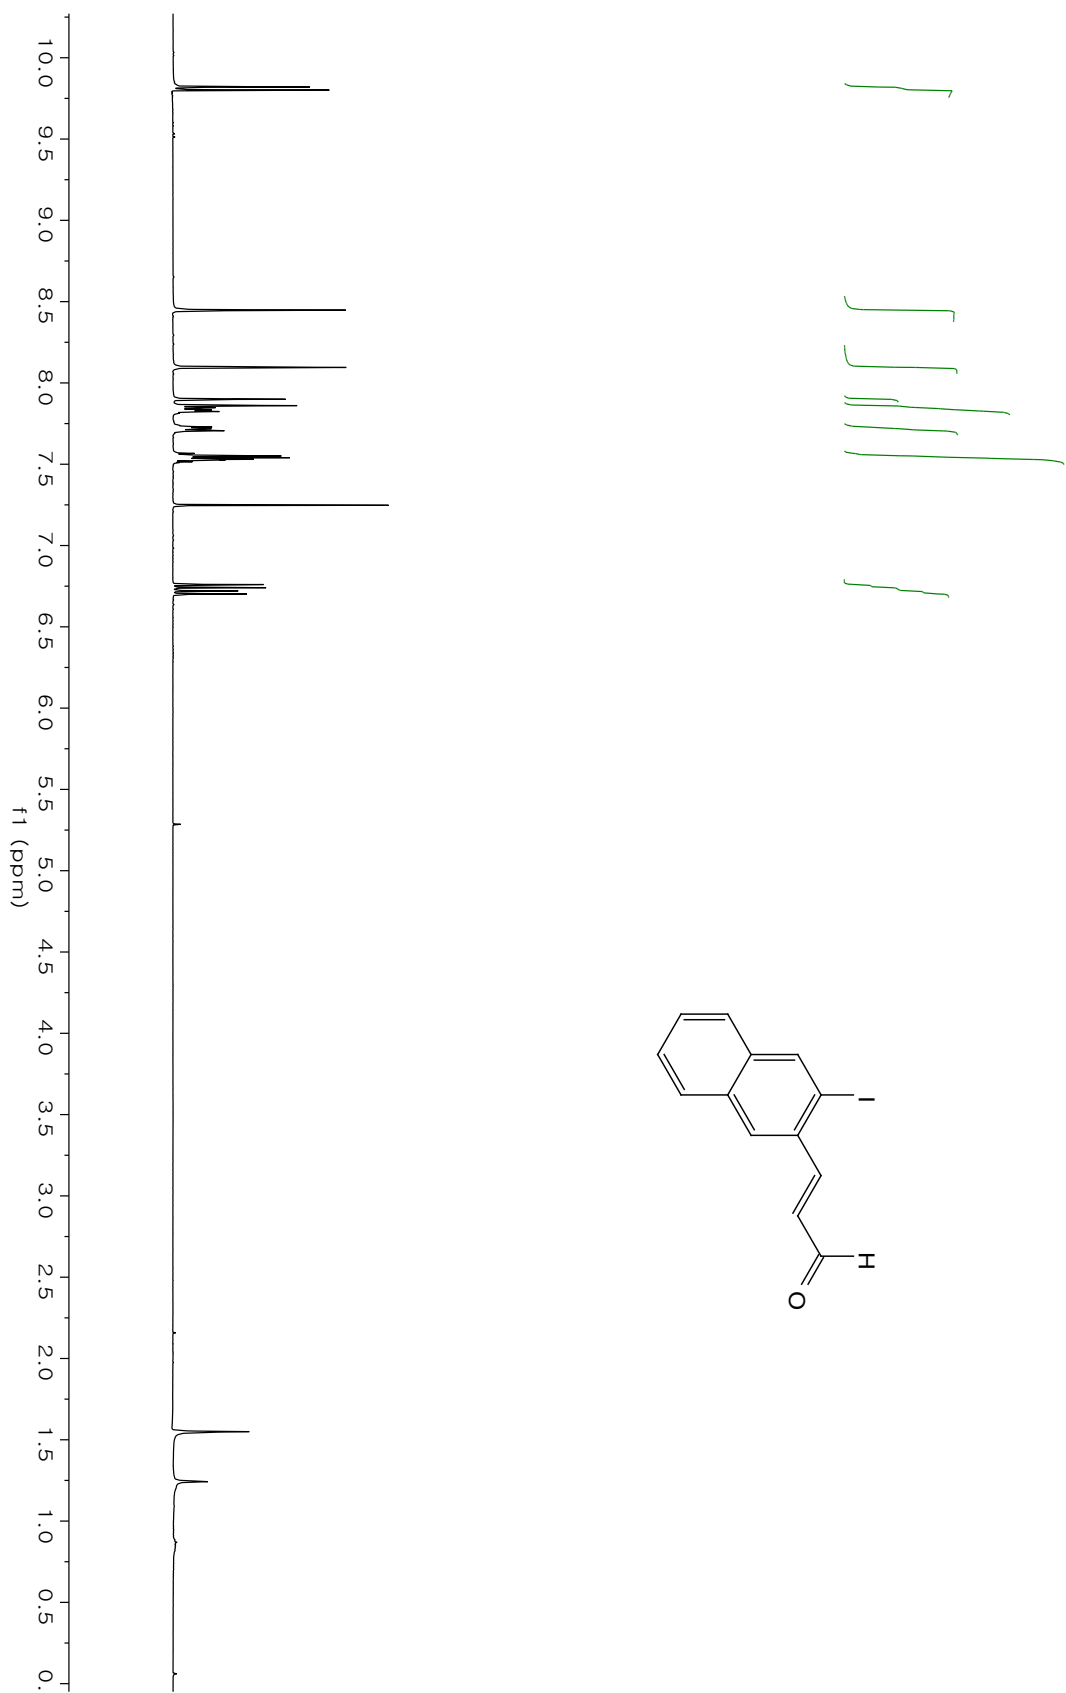

**Figure S25.**  $^1\text{H}$  NMR spectrum of **6a** recorded in  $\text{CDCl}_3$

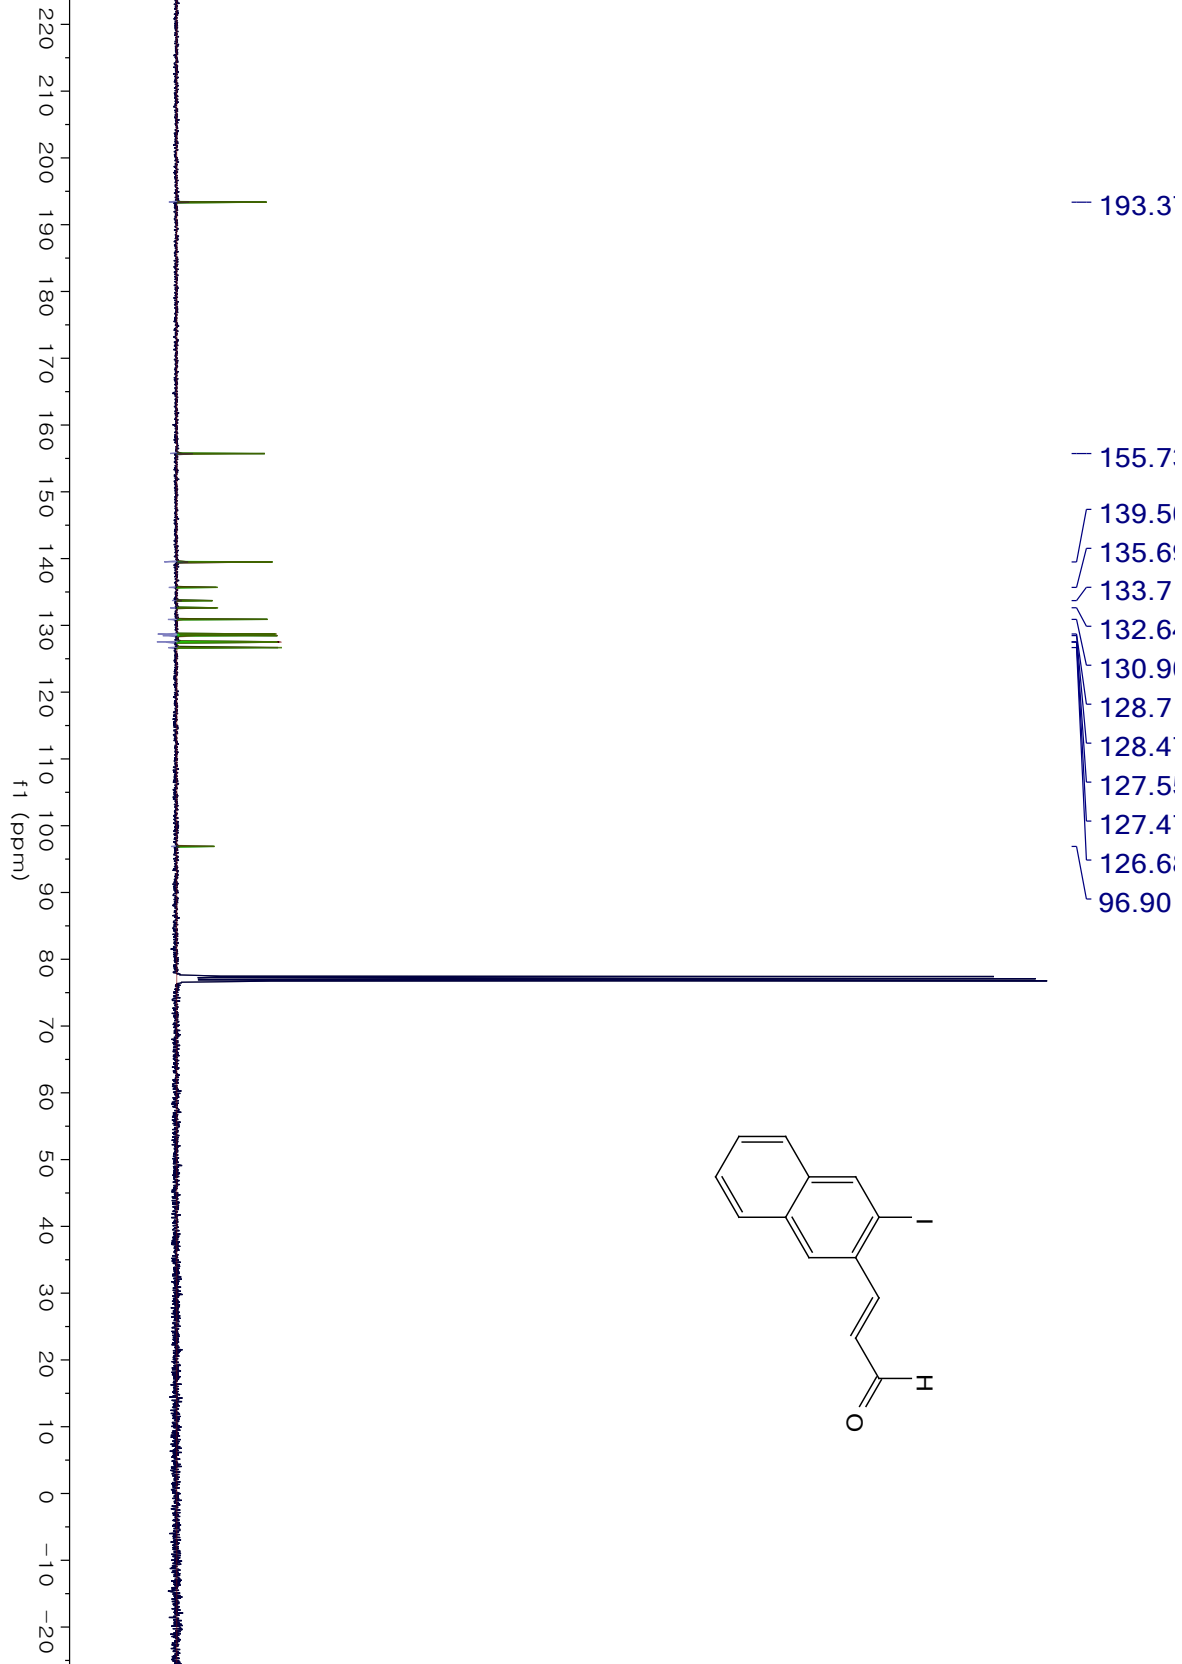

**Figure S26.**  $^{13}\text{C}$  NMR spectrum of **6a** recorded in  $\text{CDCl}_3$



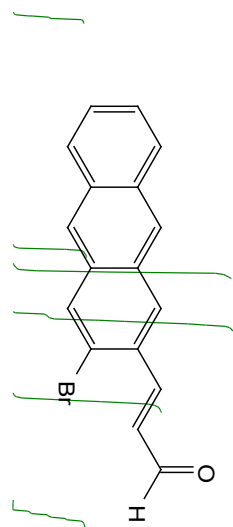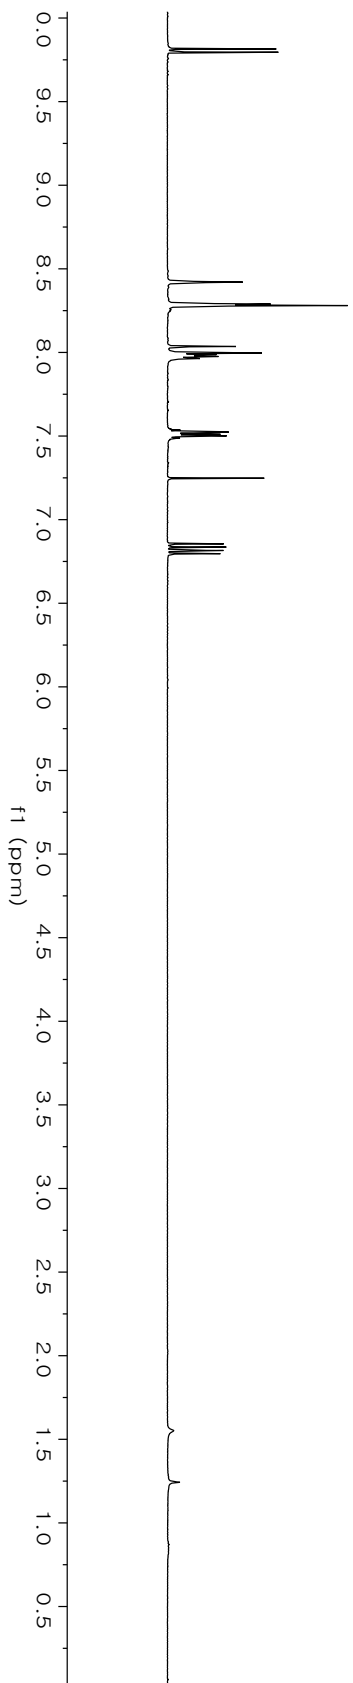

**Figure S27.**  $^1\text{H}$  NMR spectrum of **6b** recorded in  $\text{CDCl}_3$

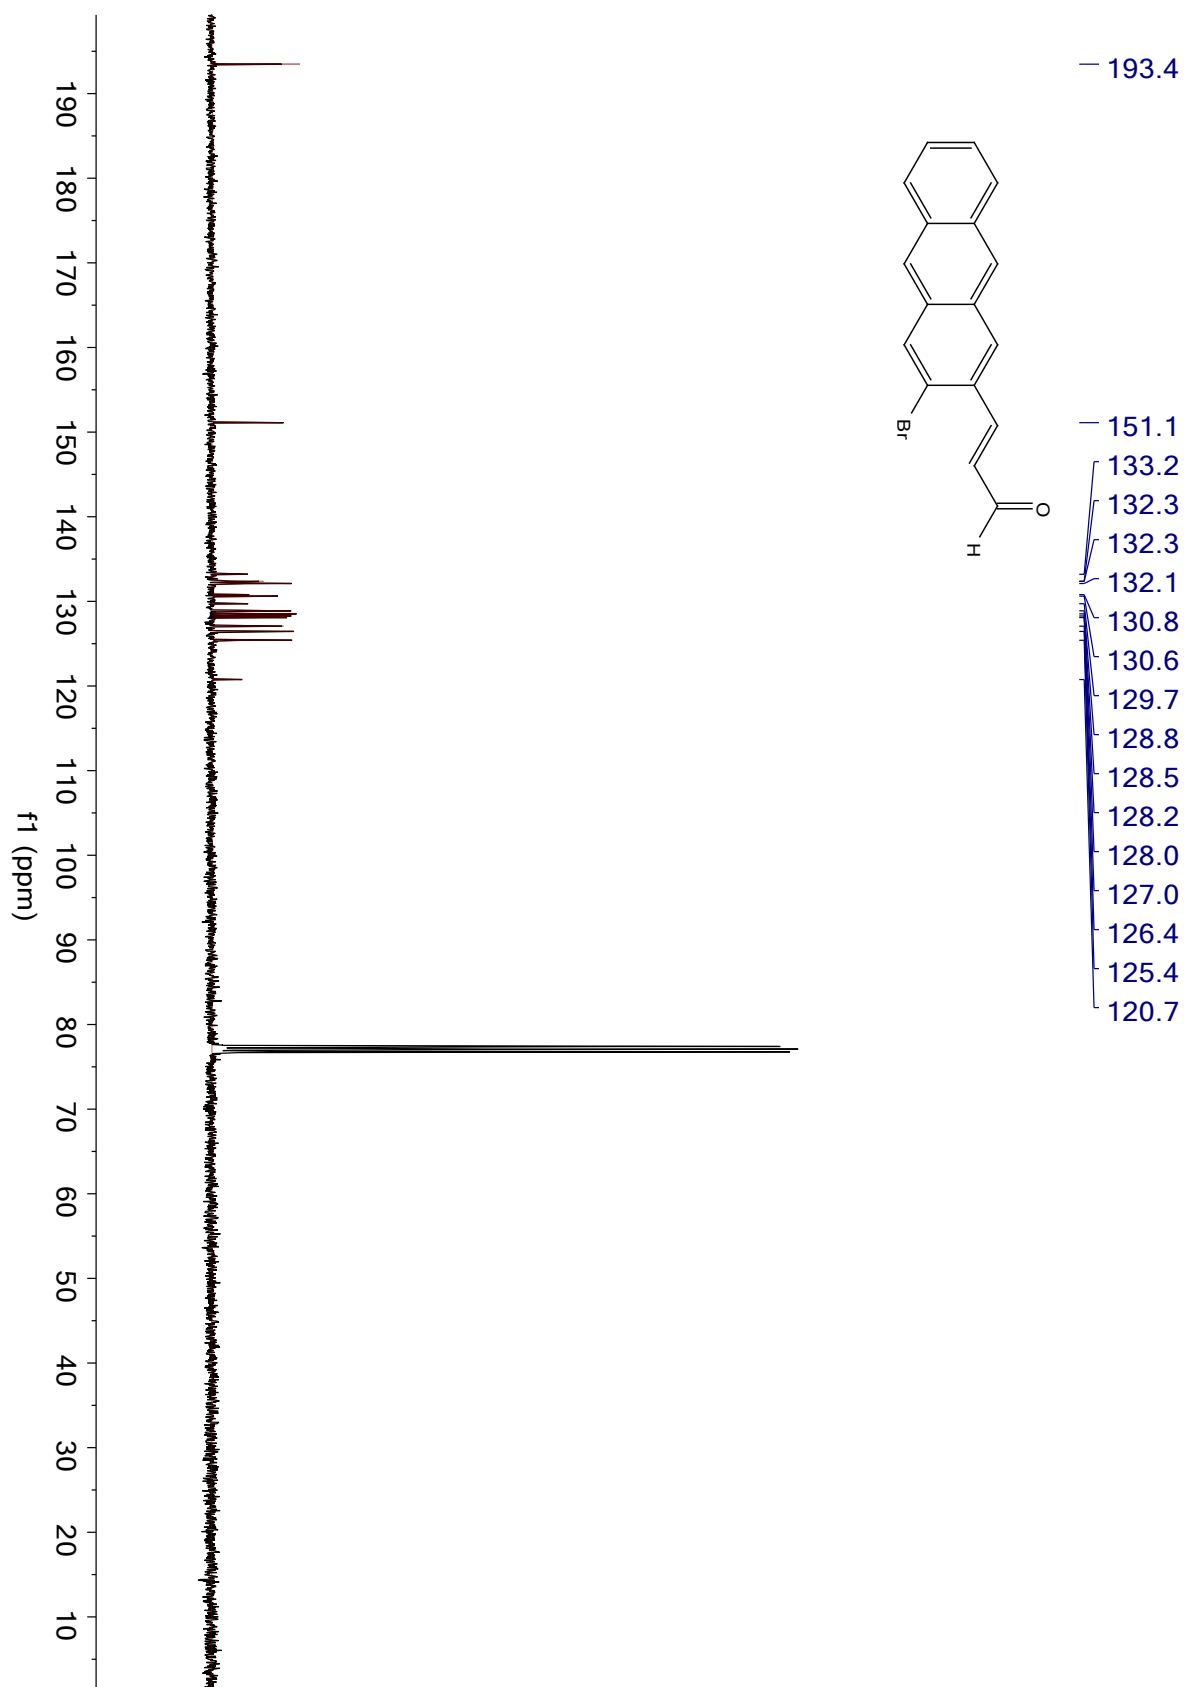

**Figure S28.**  $^{13}\text{C}$  NMR spectrum of **6b** recorded in  $\text{CDCl}_3$

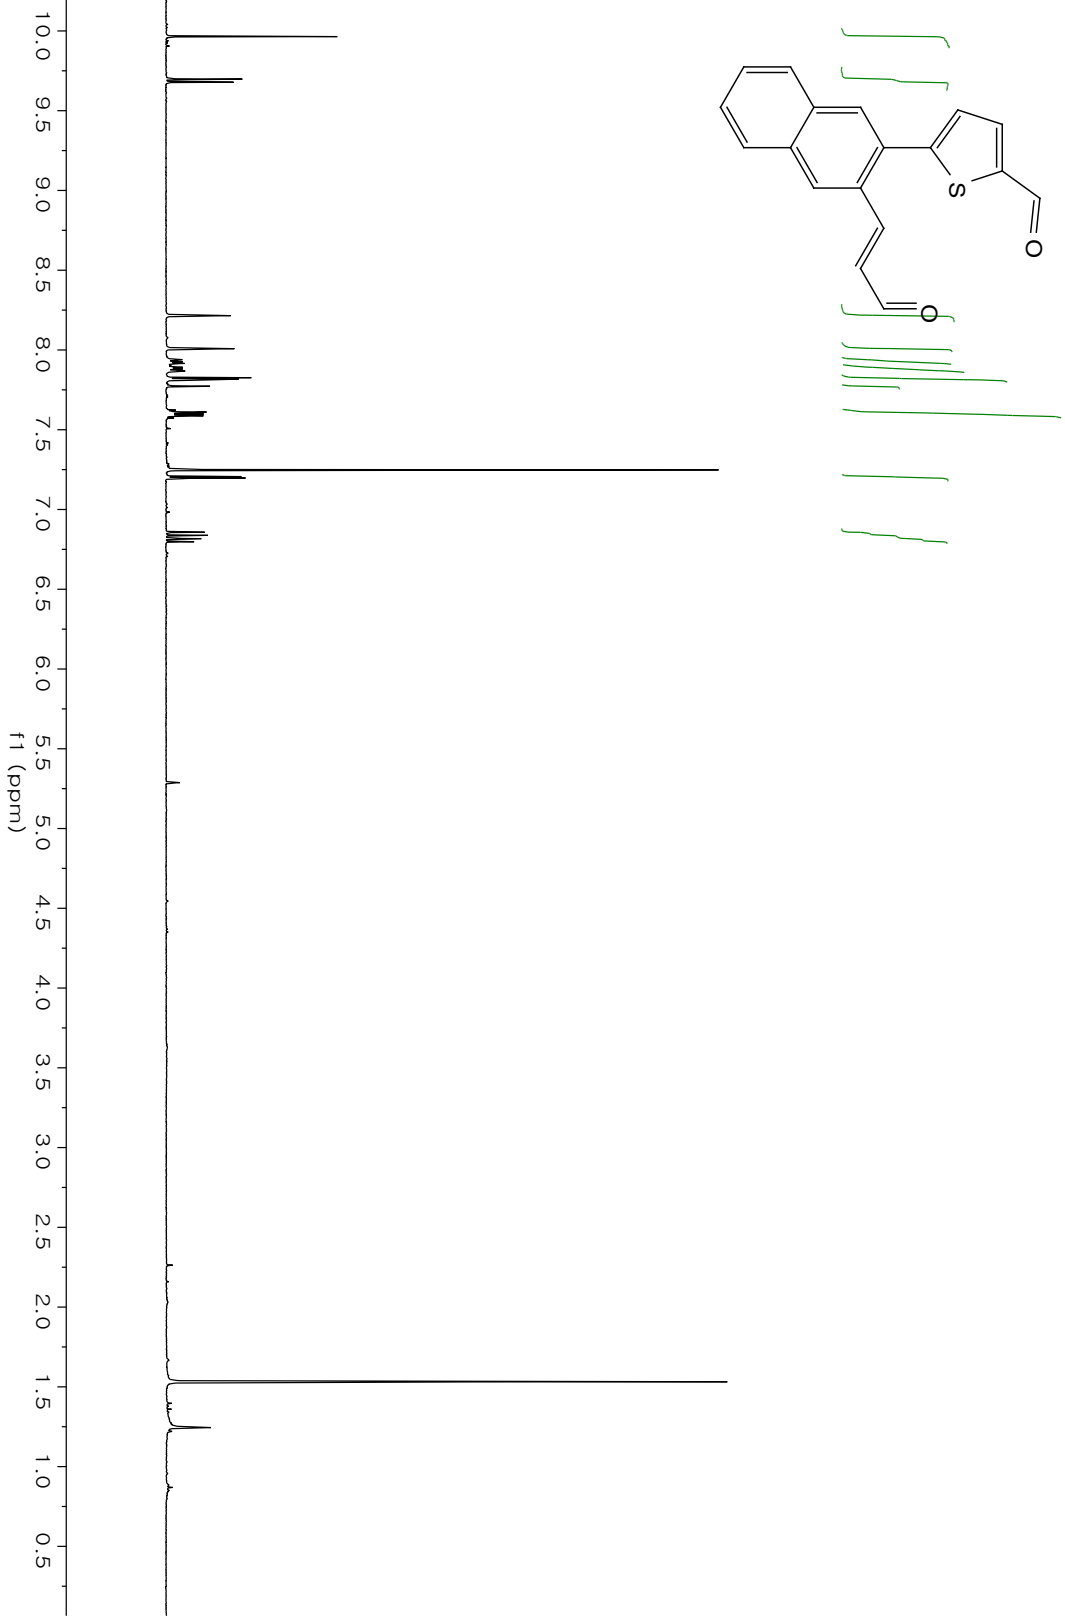

**Figure S29.**  $^1\text{H}$  NMR spectrum of **7a** recorded in  $\text{CDCl}_3$

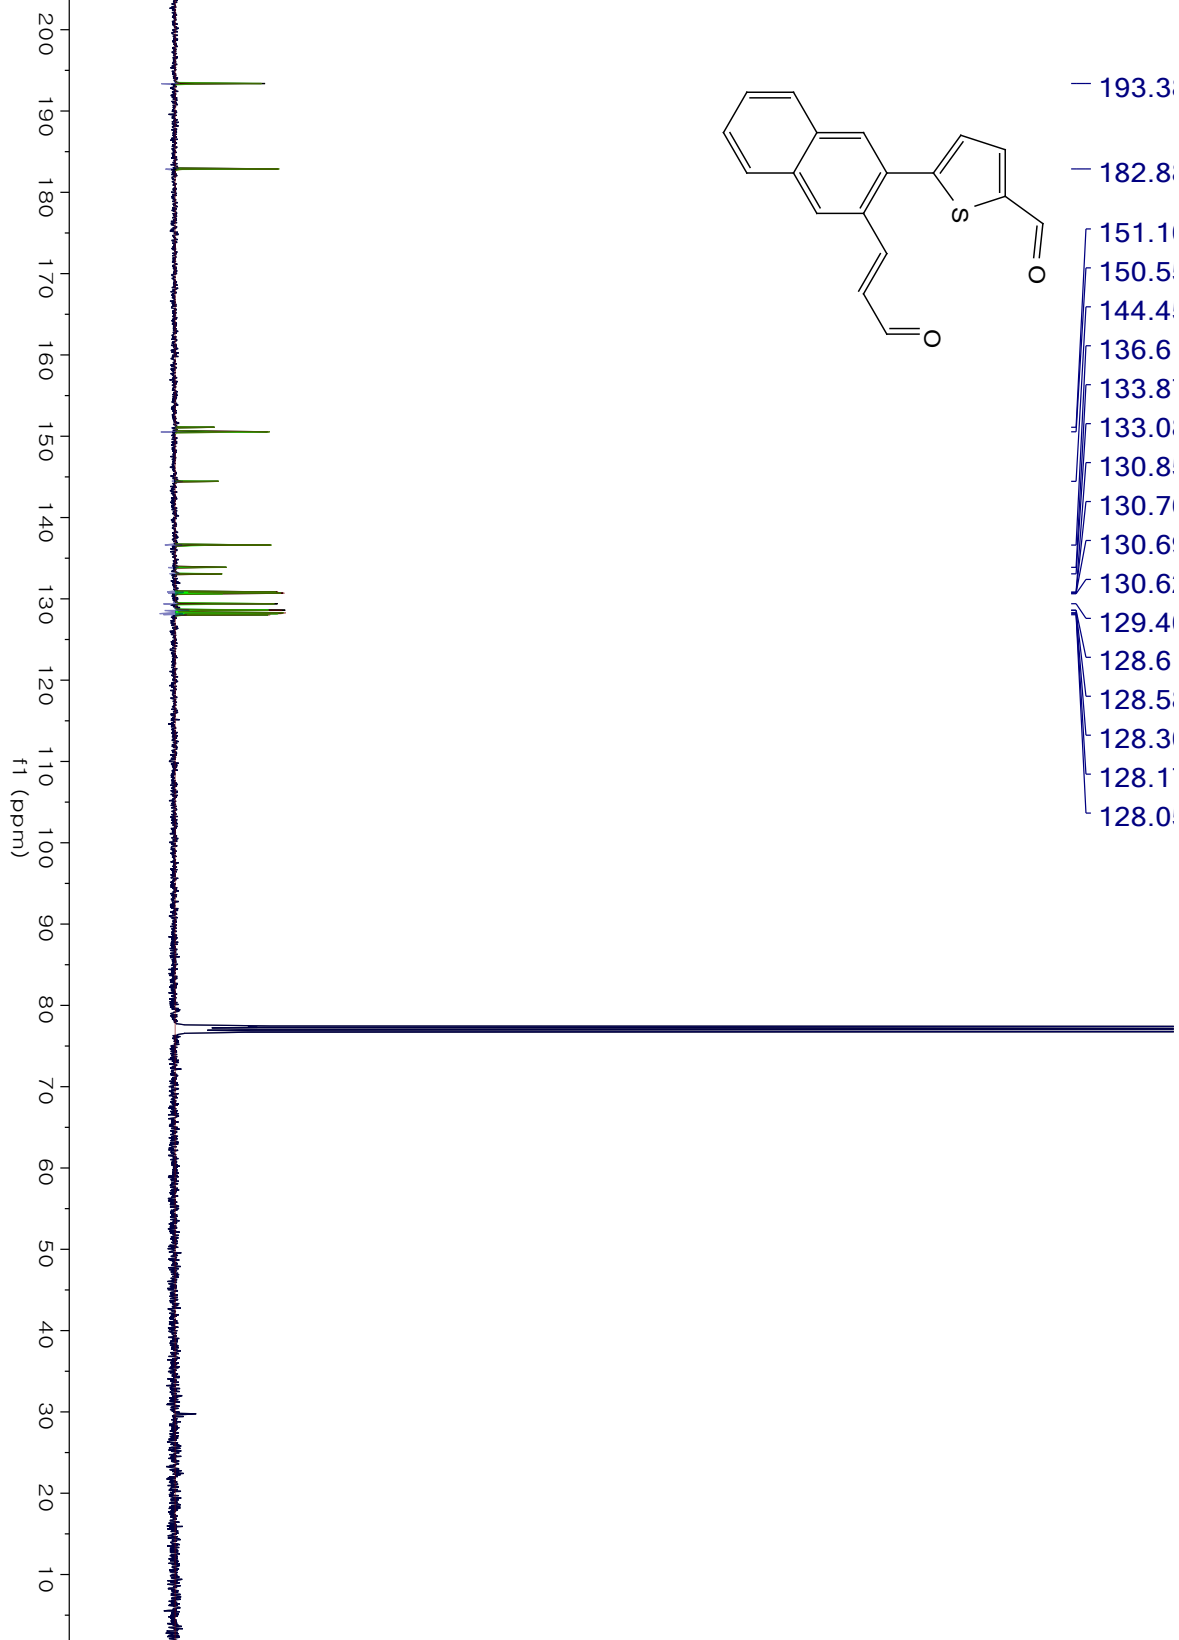

**Figure S30.**  $^{13}\text{C}$  NMR spectrum of **7a** recorded in  $\text{CDCl}_3$



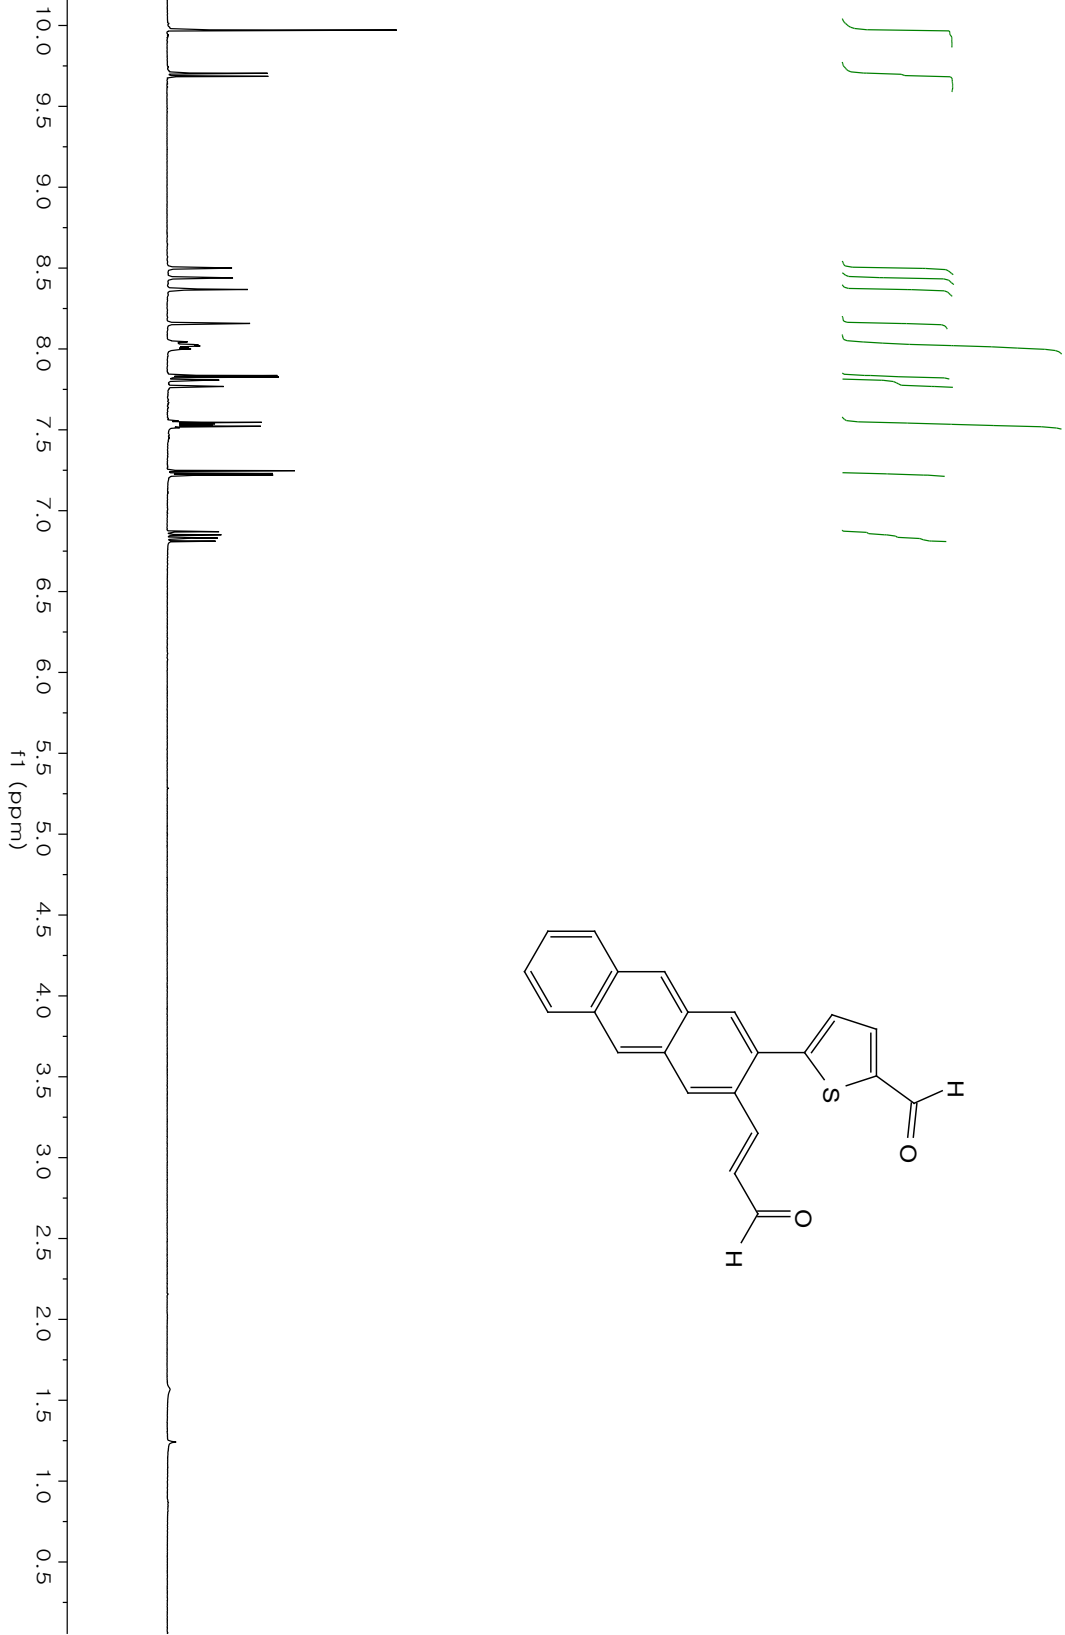

**Figure S31.**  $^1\text{H}$  NMR spectrum of **7b** recorded in  $\text{CDCl}_3$

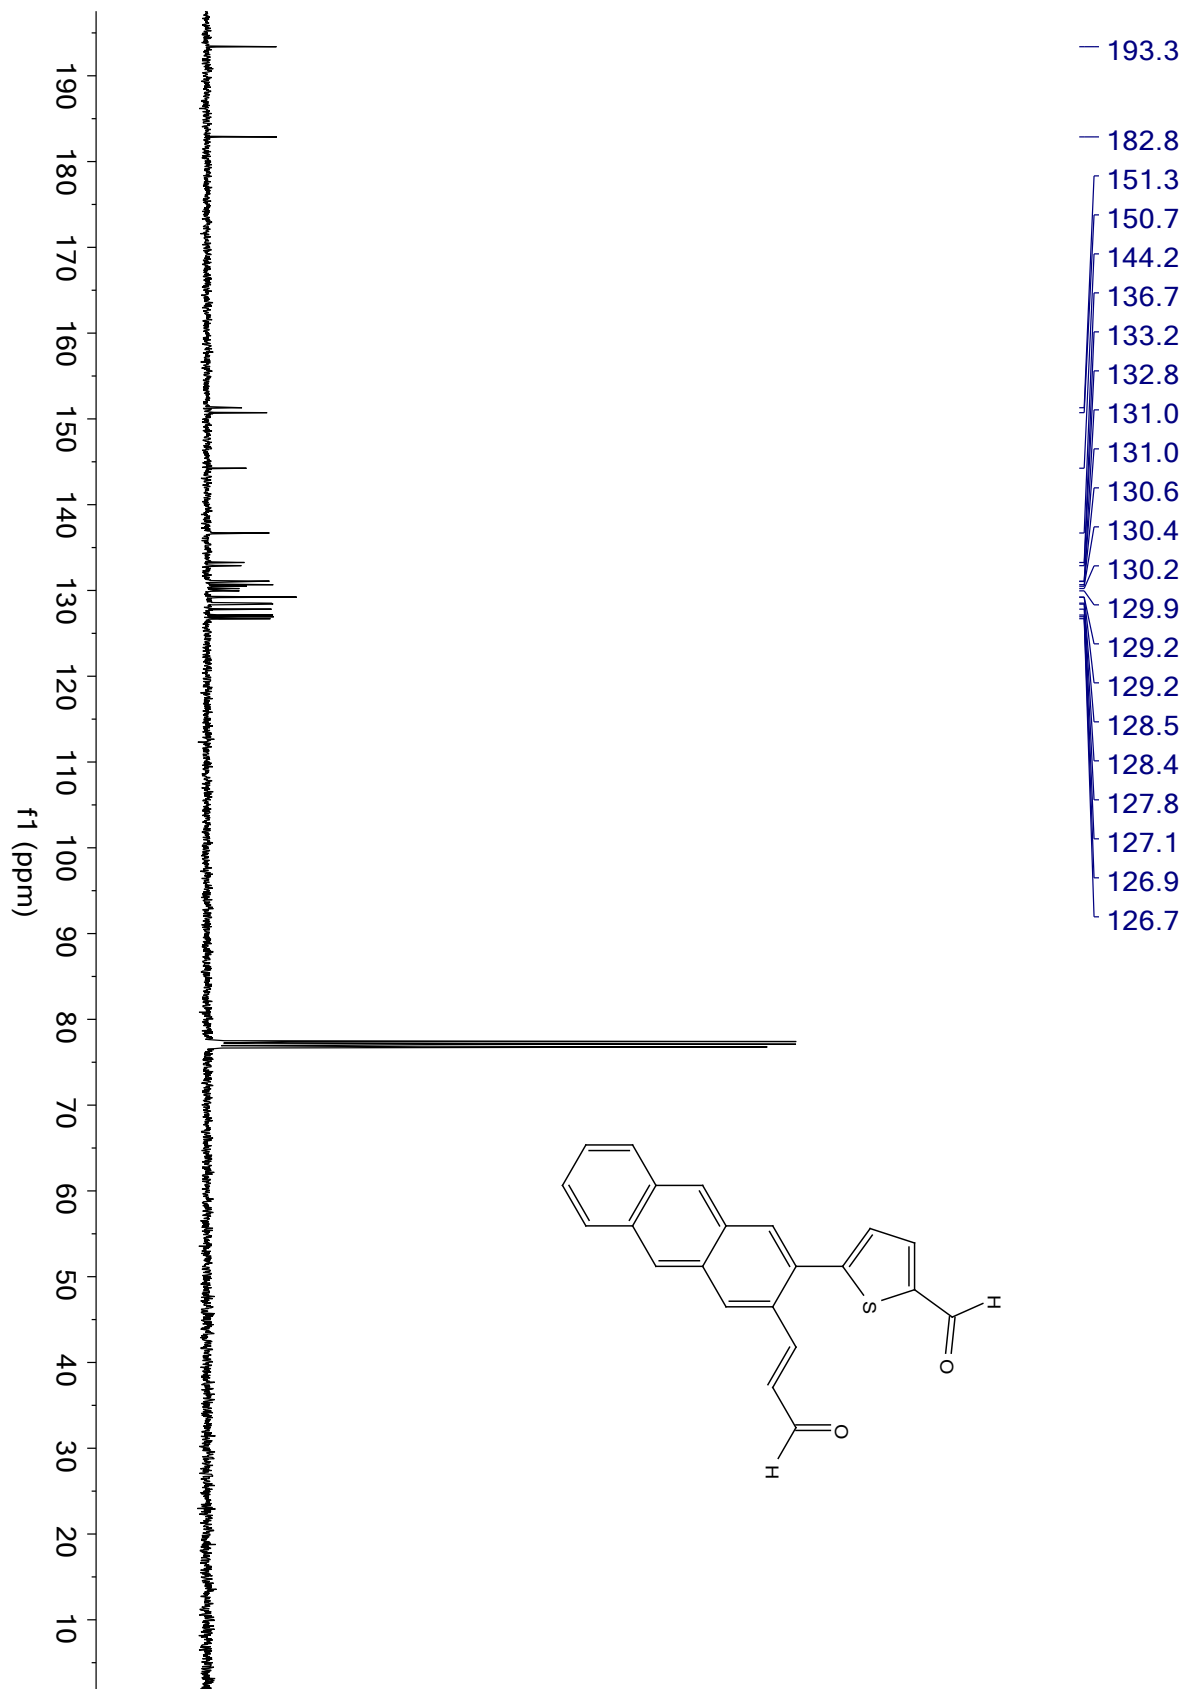

**Figure S32.**  $^{13}\text{C}$  NMR spectrum of **7b** recorded in  $\text{CDCl}_3$

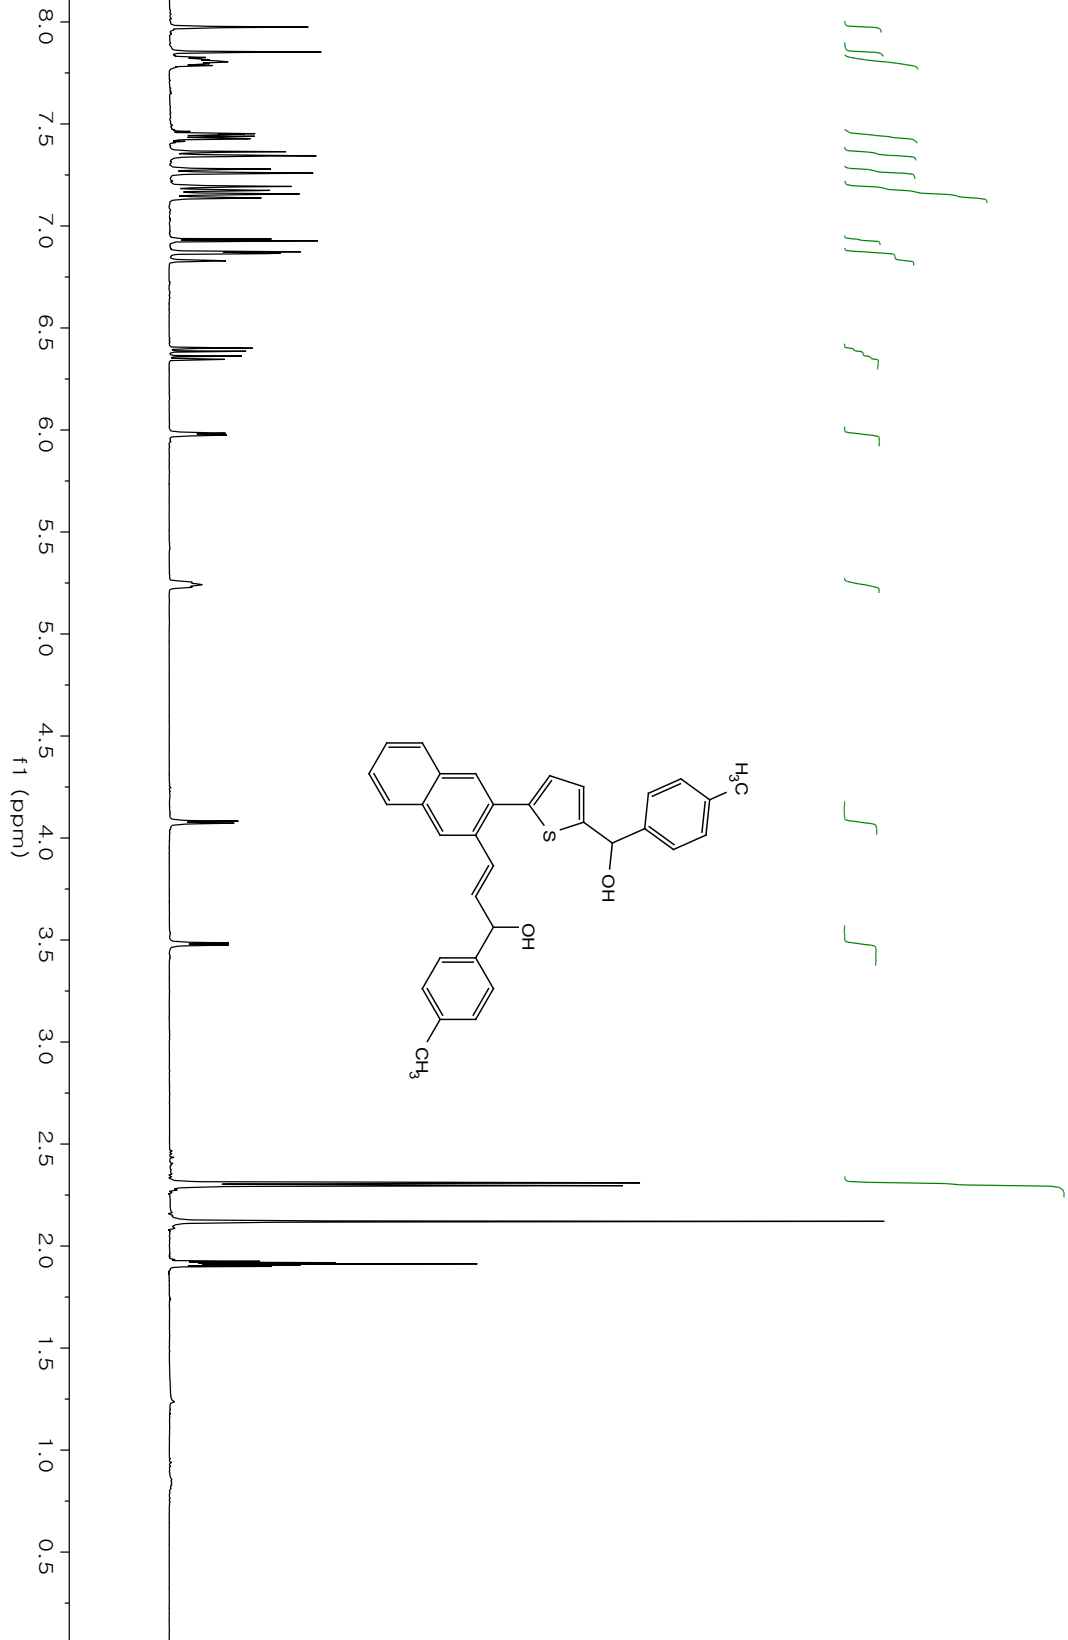

**Figure S33.**  $^1\text{H}$  NMR spectrum of **8a** recorded in  $\text{CD}_3\text{CN}$

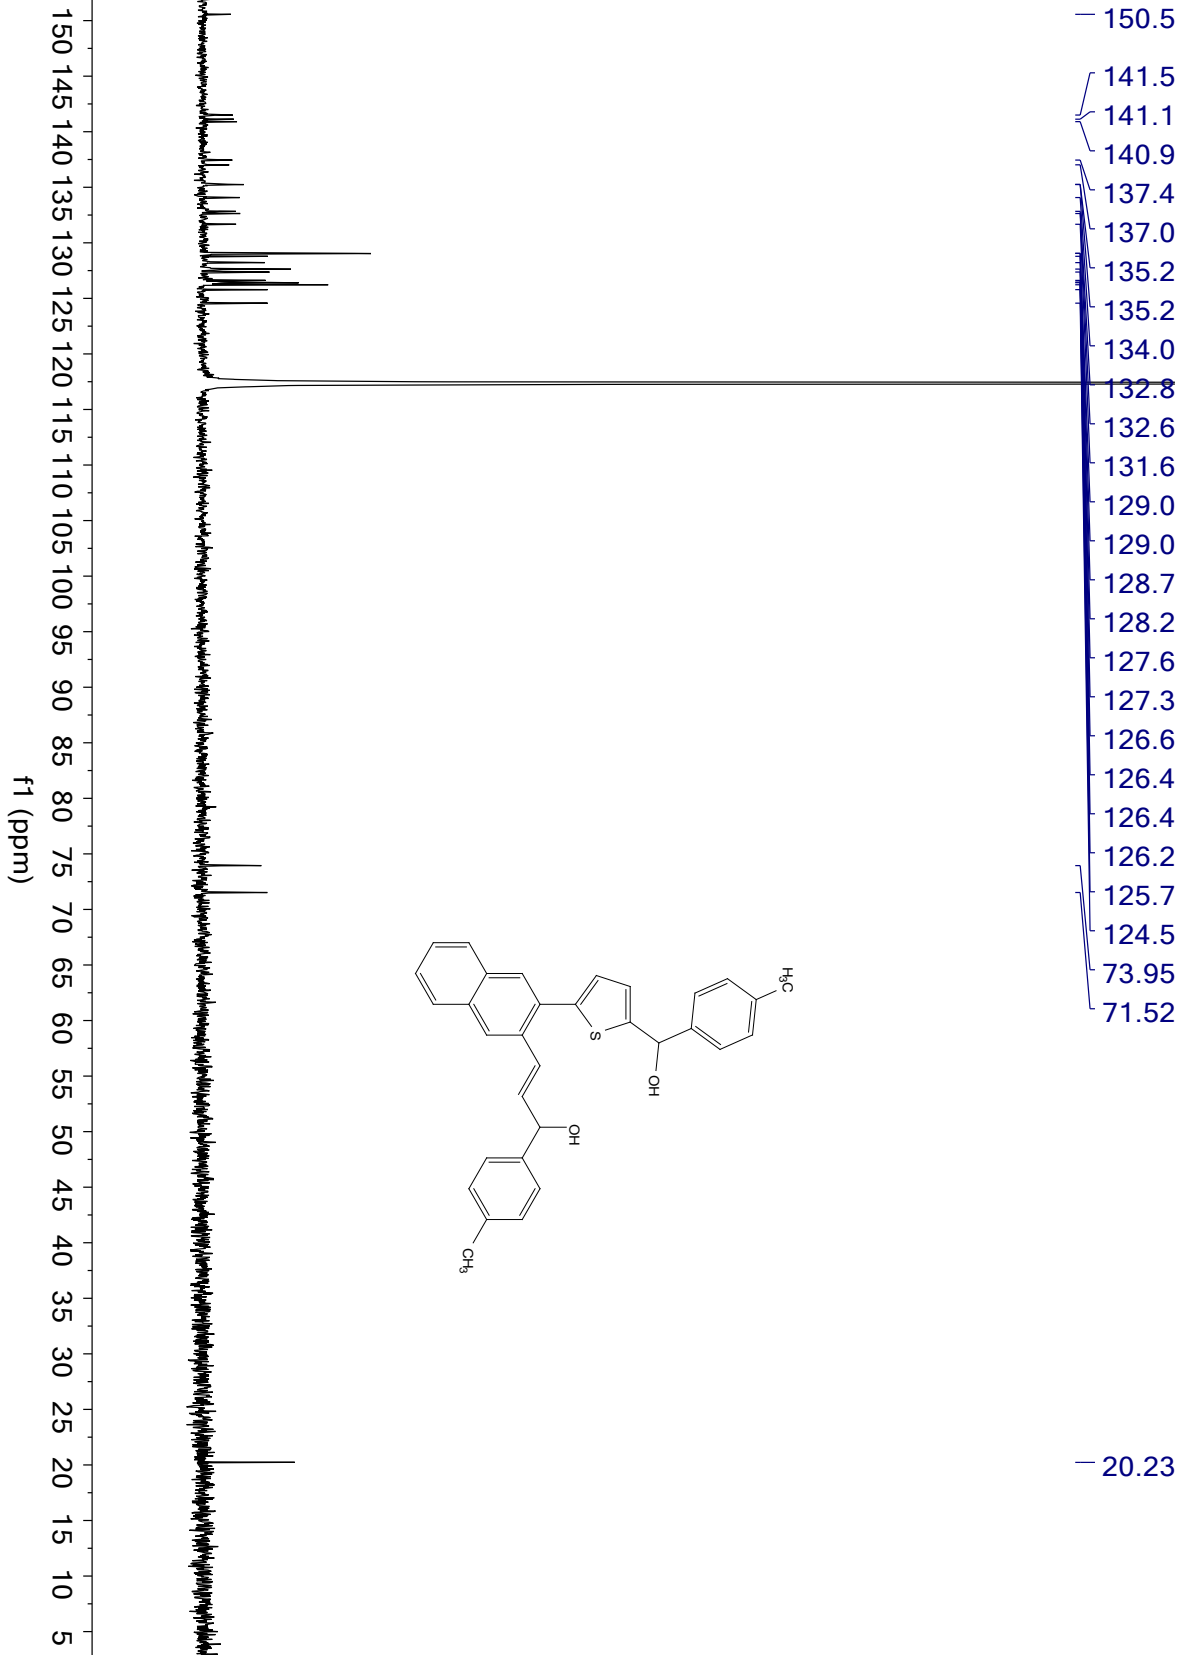

**Figure S34.**  $^{13}\text{C}$  NMR spectrum of **8a** recorded in  $\text{CD}_3\text{CN}$



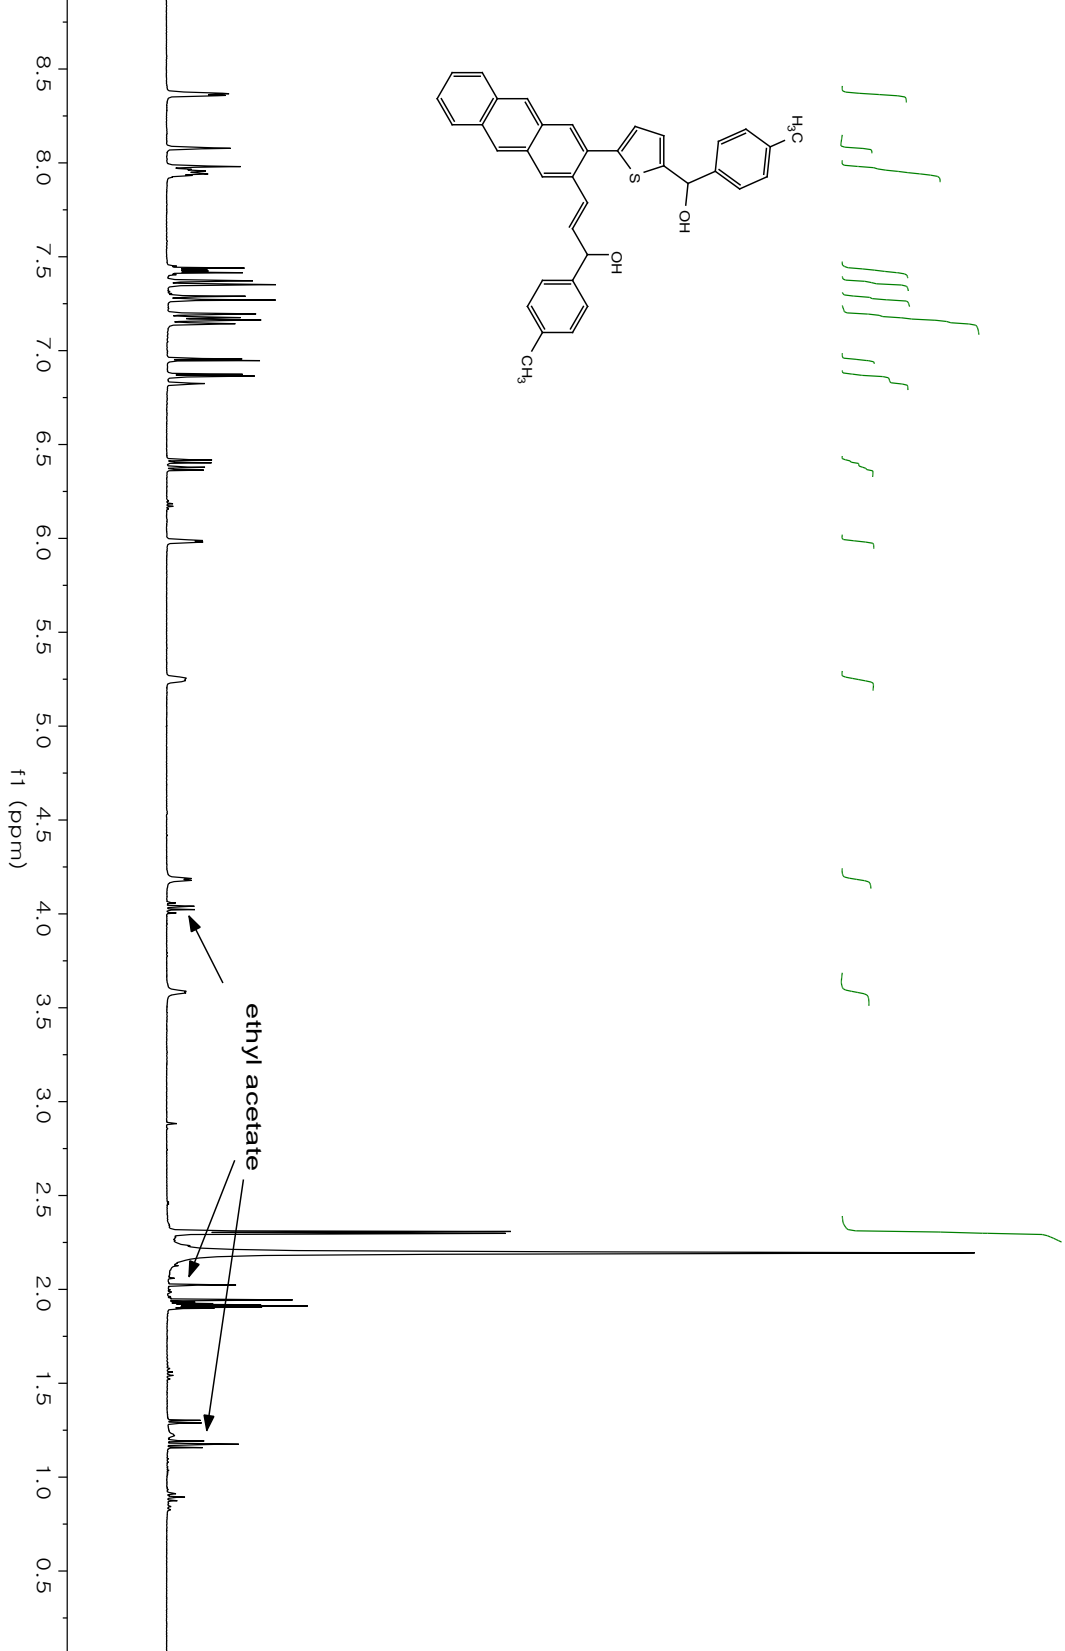

**Figure S35.**  $^1\text{H}$  NMR spectrum of **8b** recorded in  $\text{CD}_3\text{CN}$

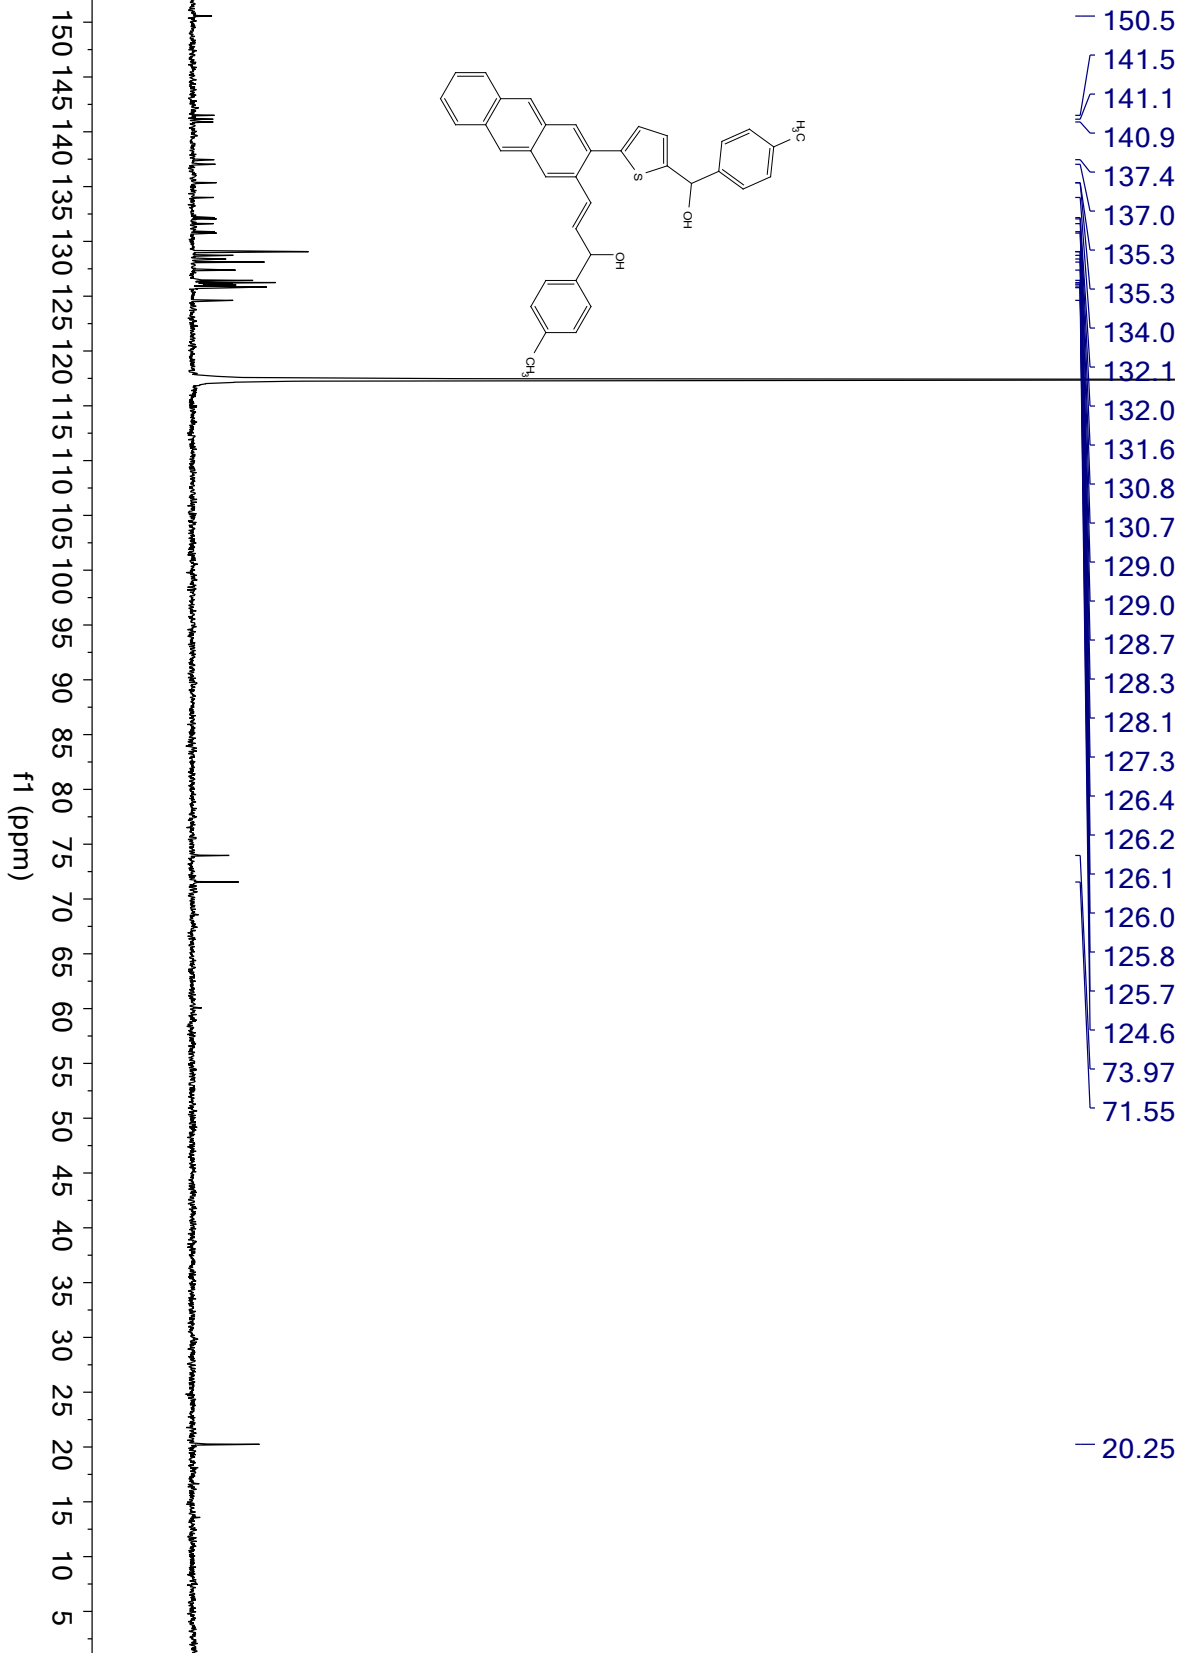

**Figure S36.**  $^{13}\text{C}$  NMR spectrum of **8b** recorded in  $\text{CD}_3\text{CN}$

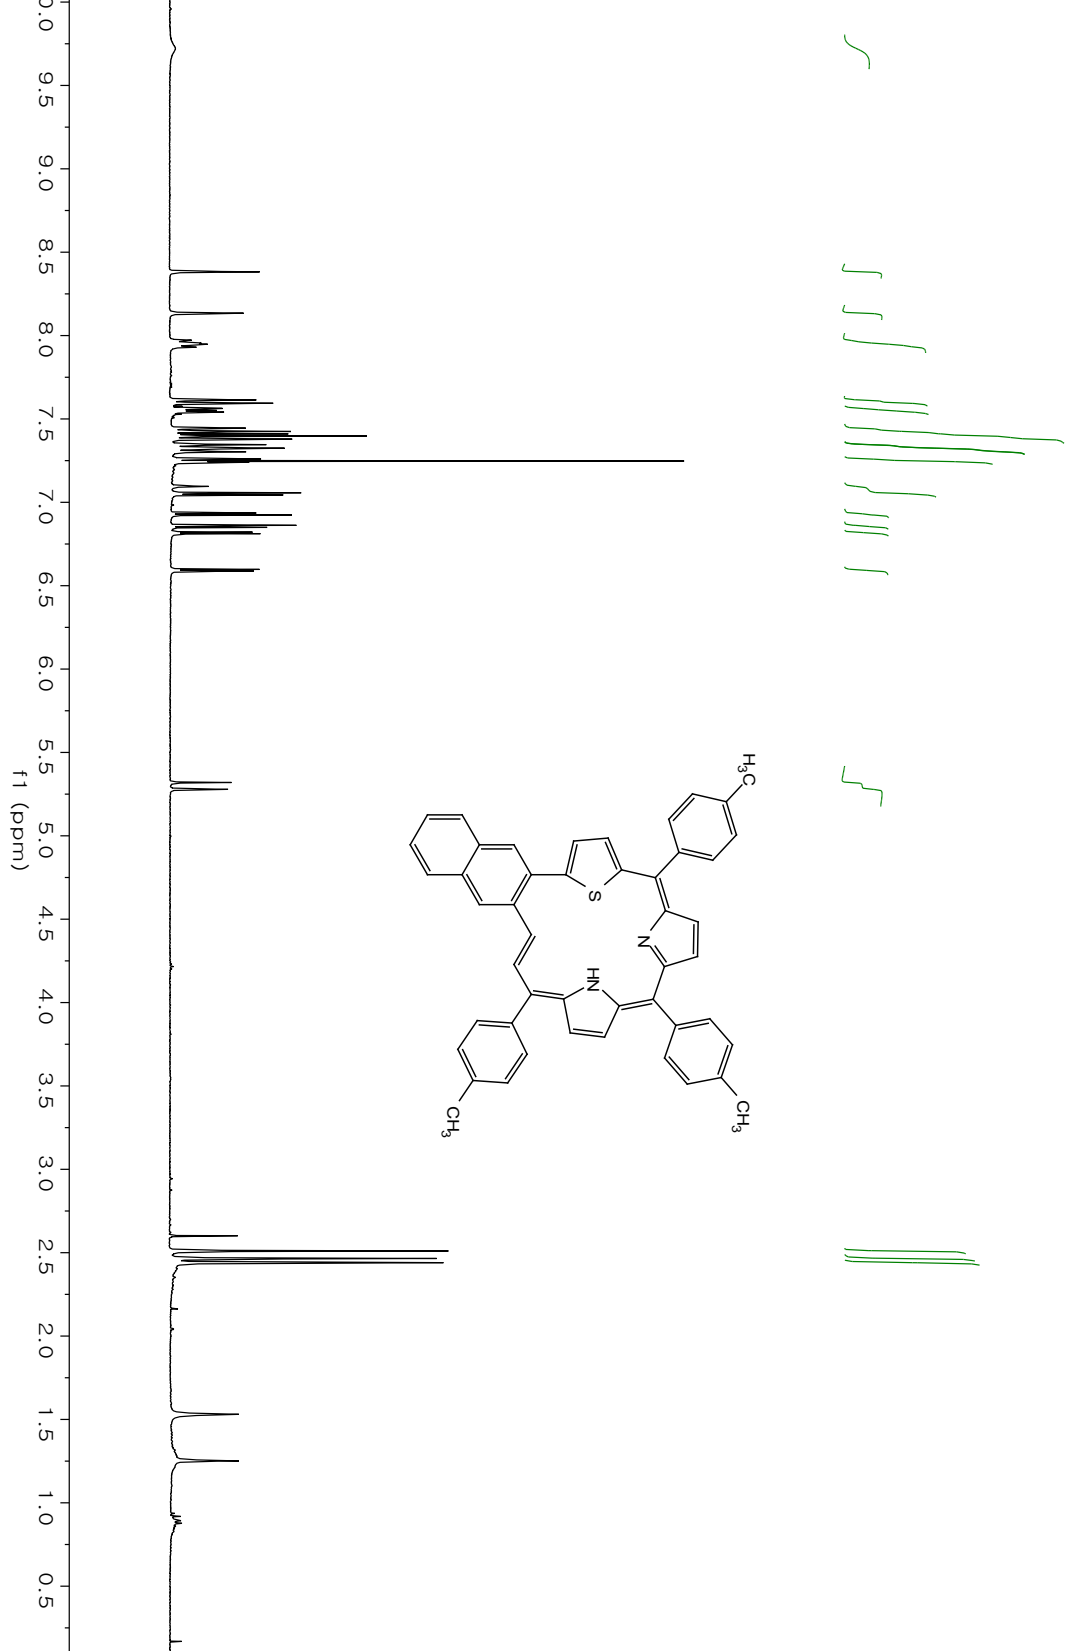

**Figure S37.**  $^1\text{H}$  NMR spectrum of **4a** recorded in  $\text{CDCl}_3$

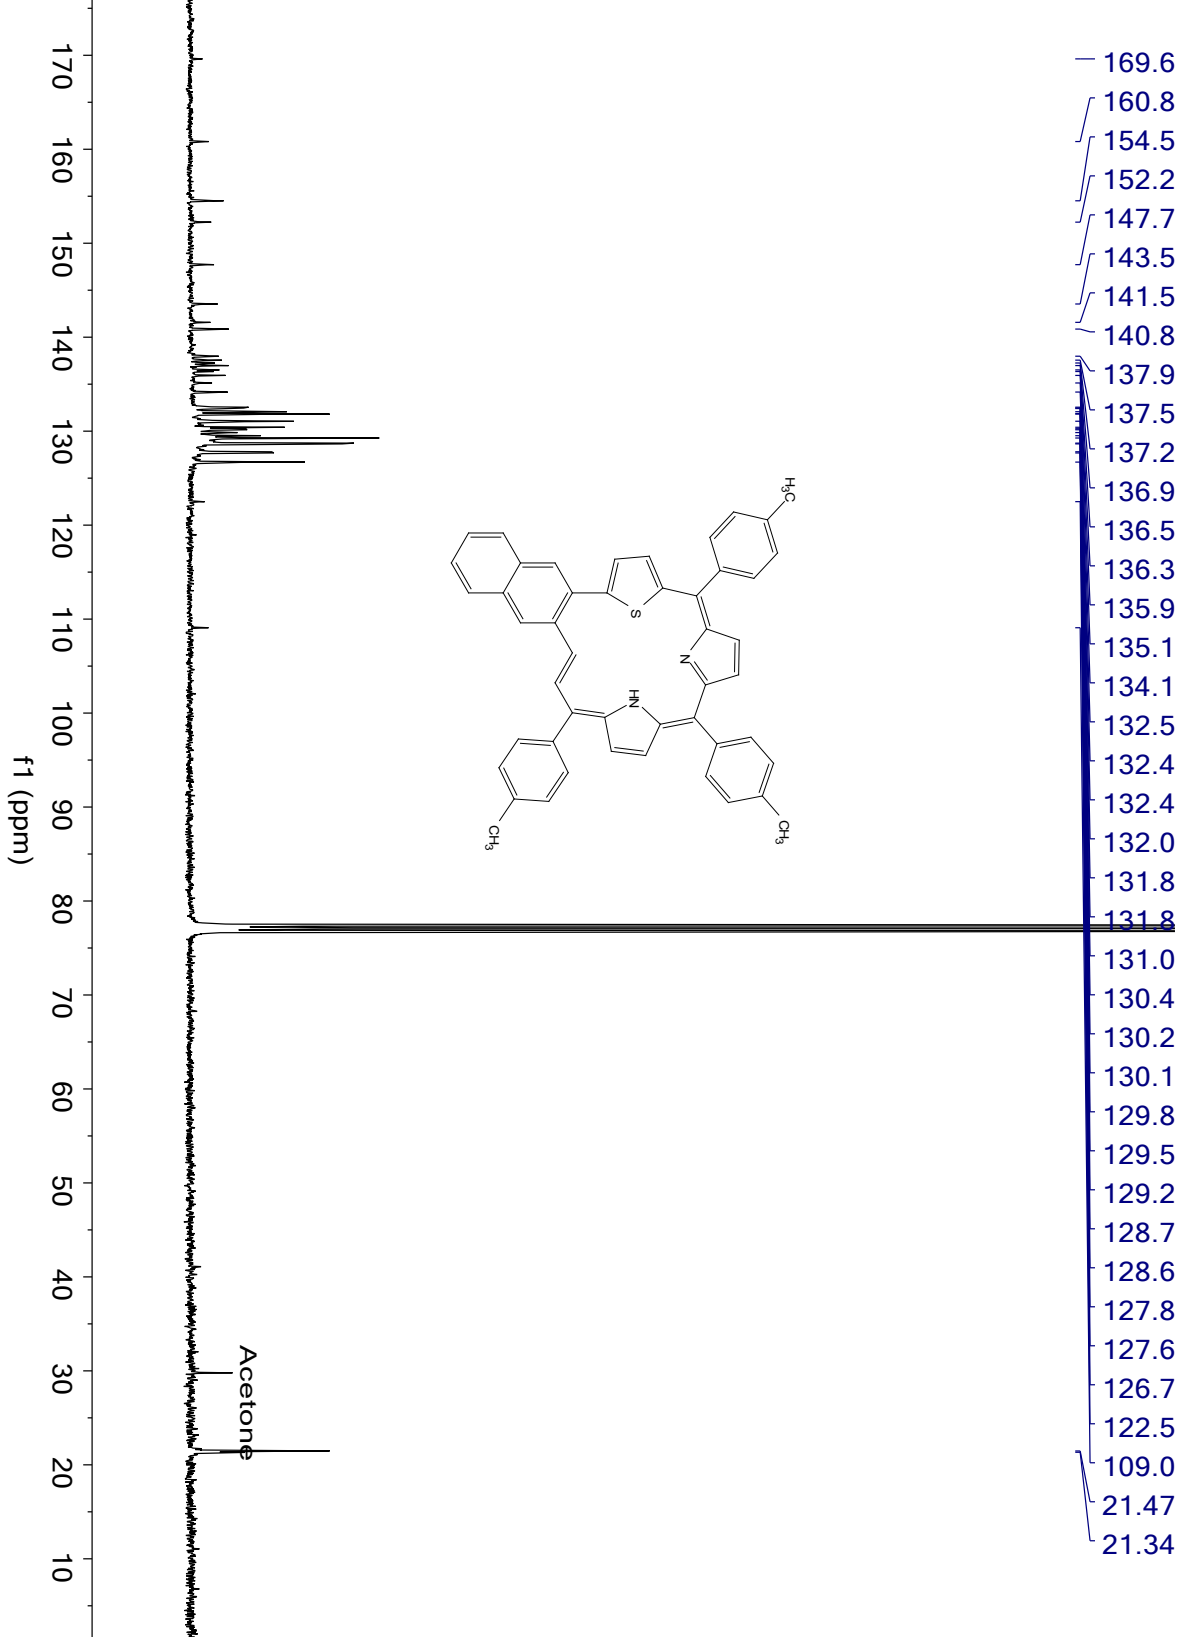

**Figure S38.**  $^{13}\text{C}$  NMR spectrum of **4a** recorded in  $\text{CDCl}_3$



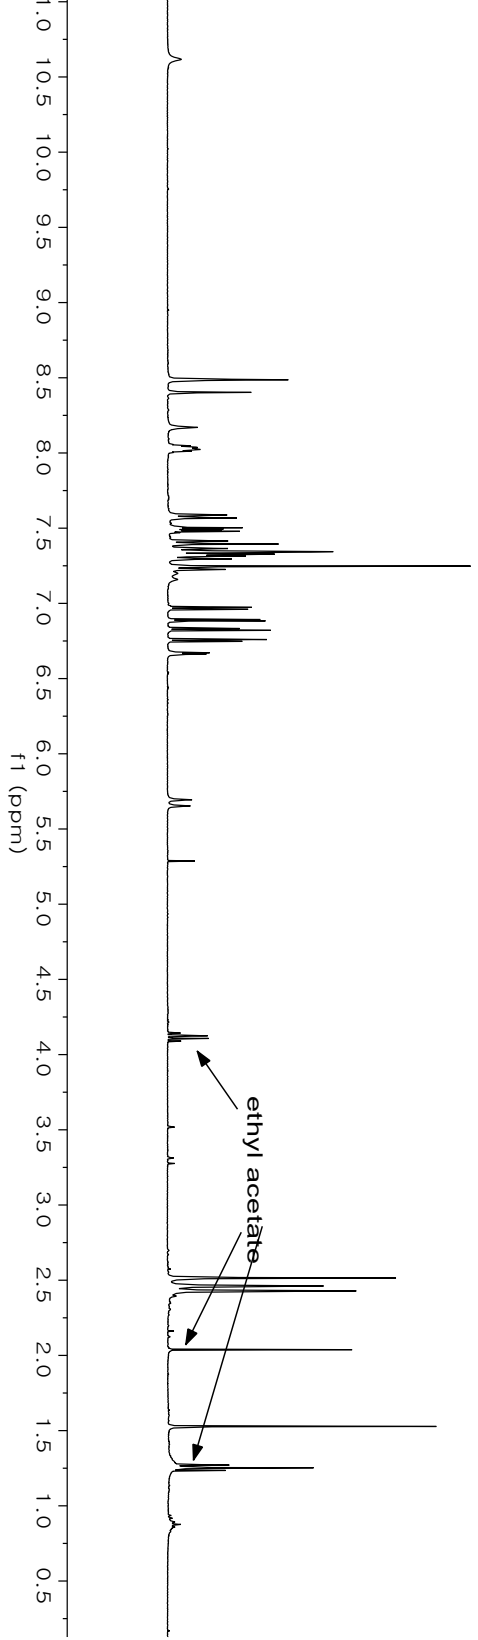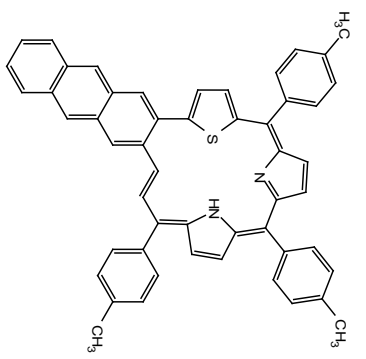

Handwritten notes in green ink, including a large vertical line and several horizontal lines, likely indicating integration or peak assignments.

Handwritten notes in green ink, consisting of three vertical lines.

**Figure S39.**  $^1\text{H}$  NMR spectrum of **4b** recorded in  $\text{CDCl}_3$

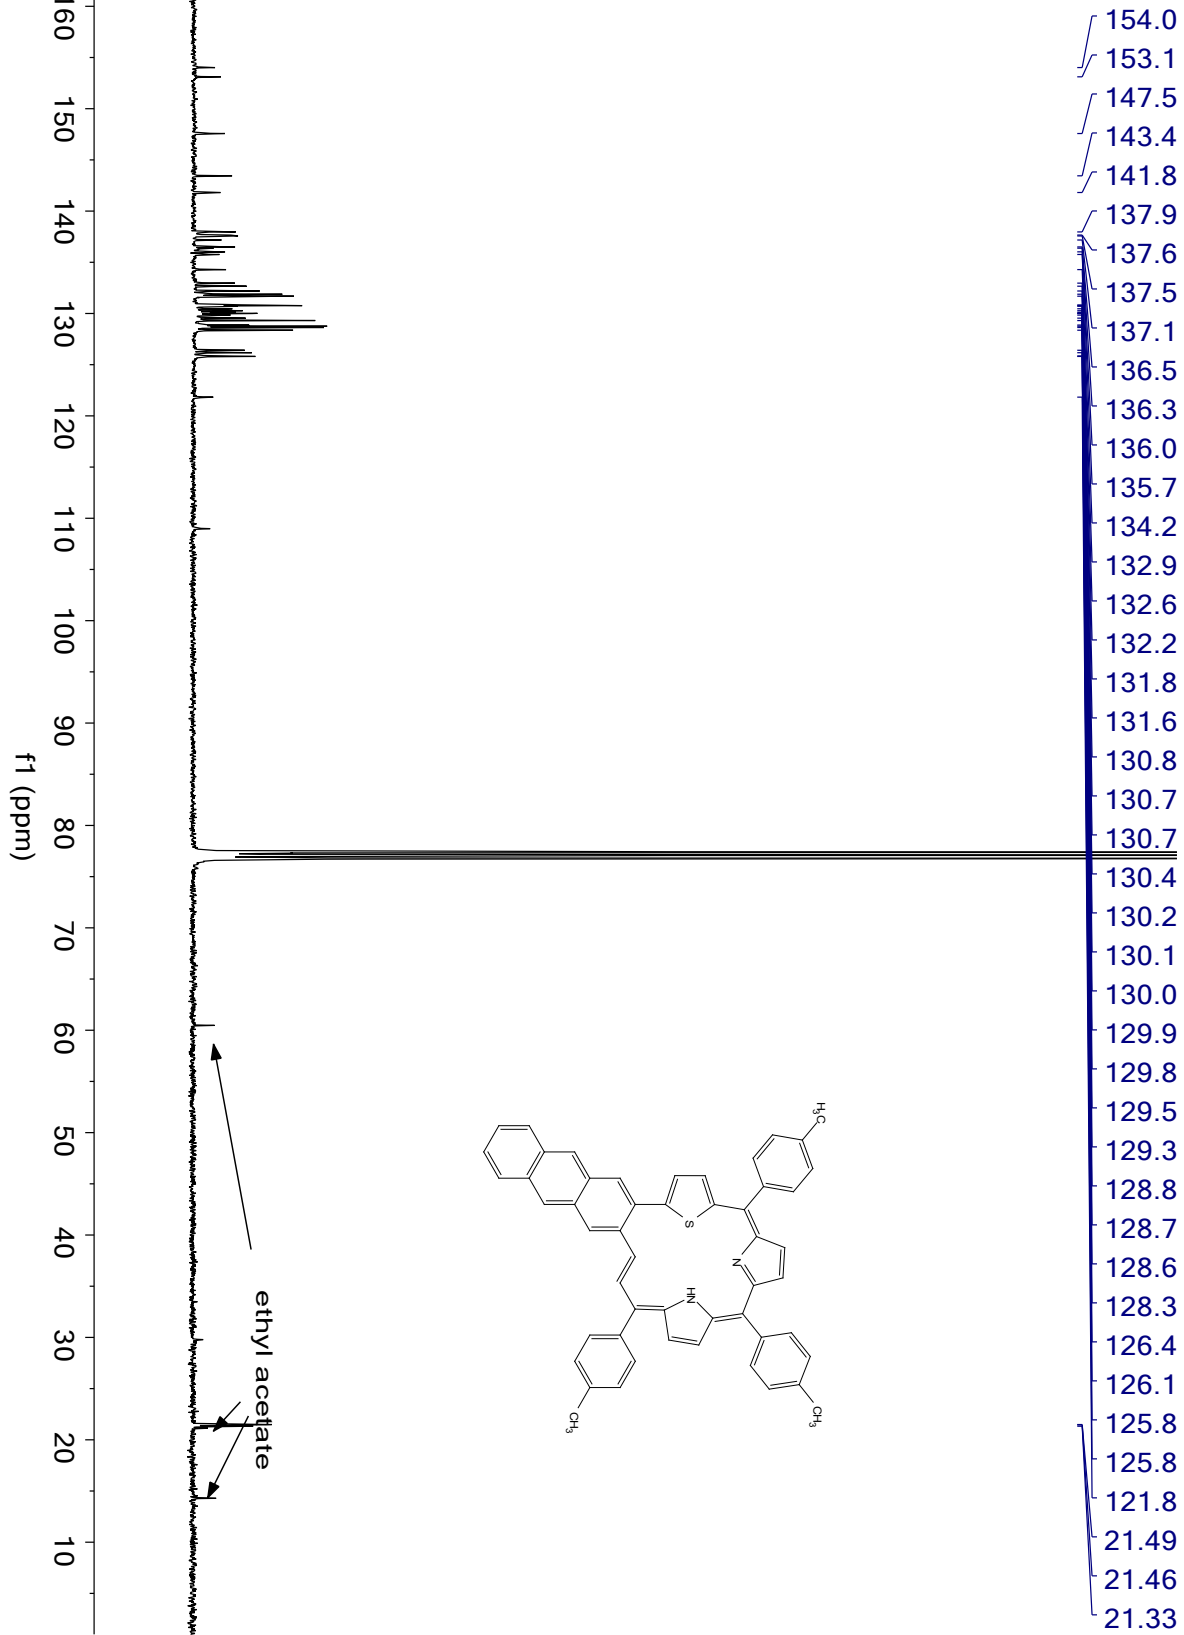

**Figure S40.**  $^{13}\text{C}$  NMR spectrum of **4b** recorded in  $\text{CDCl}_3$

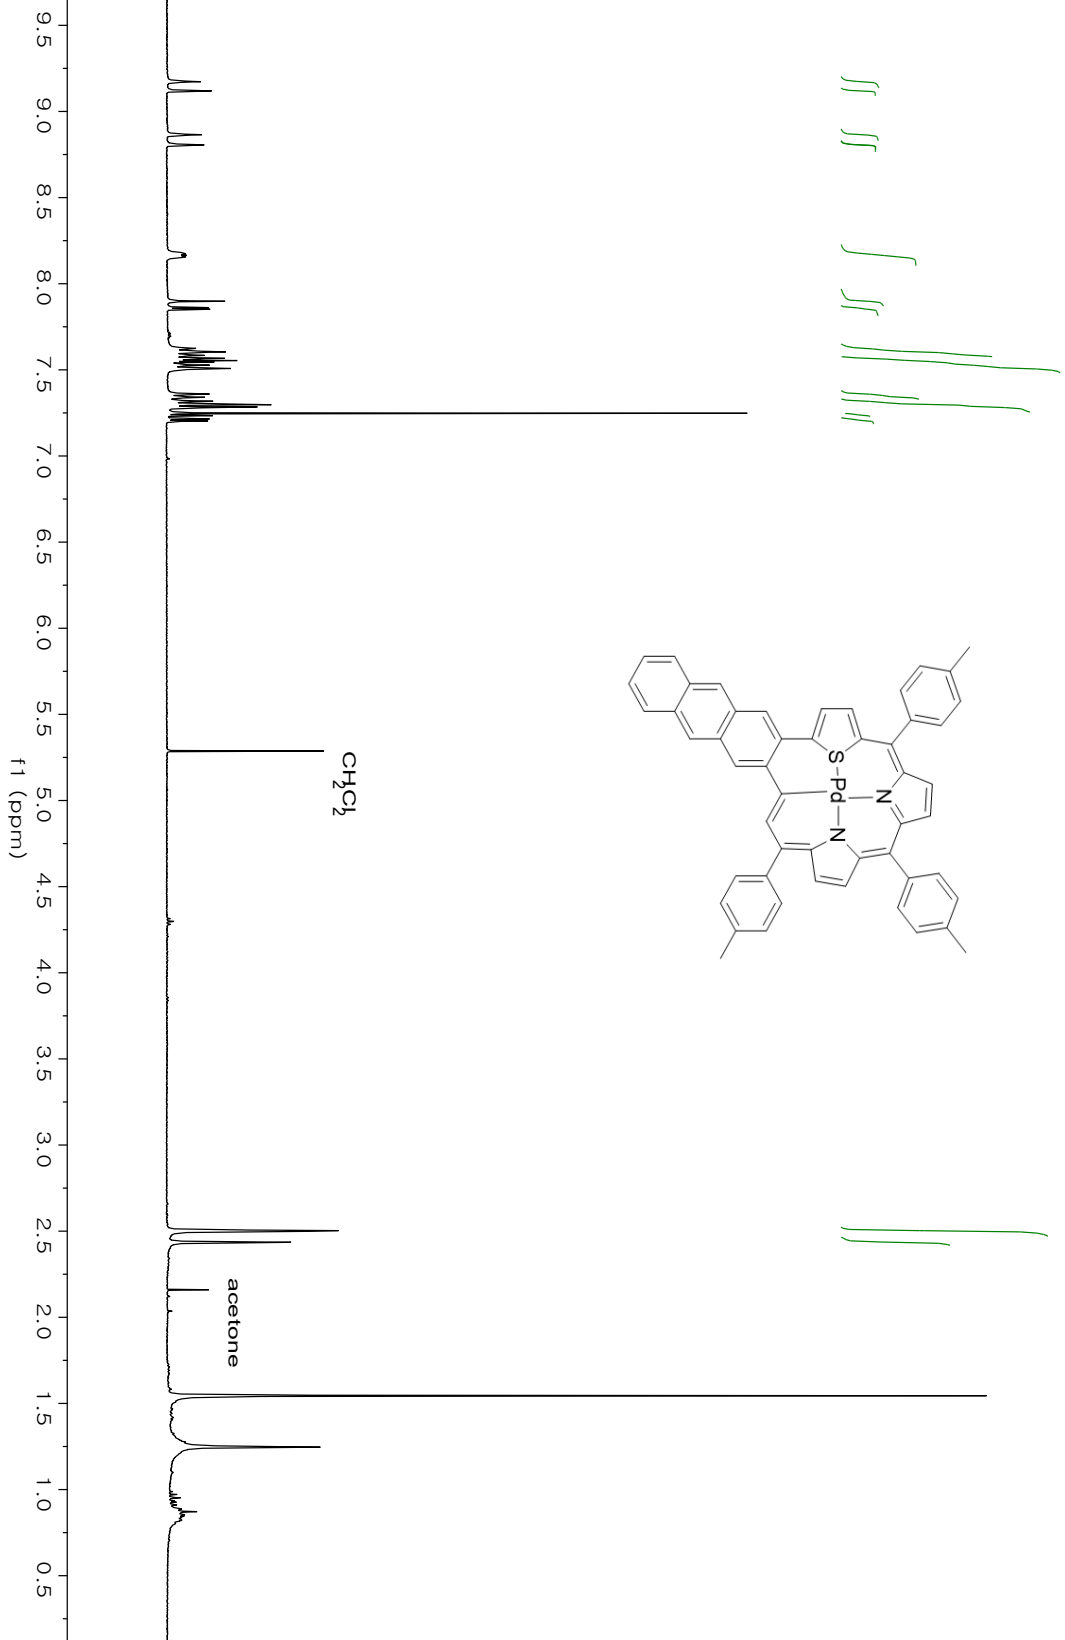

**Figure S41.**  $^1\text{H}$  NMR spectrum of **Pd-4b** recorded in  $\text{CDCl}_3$

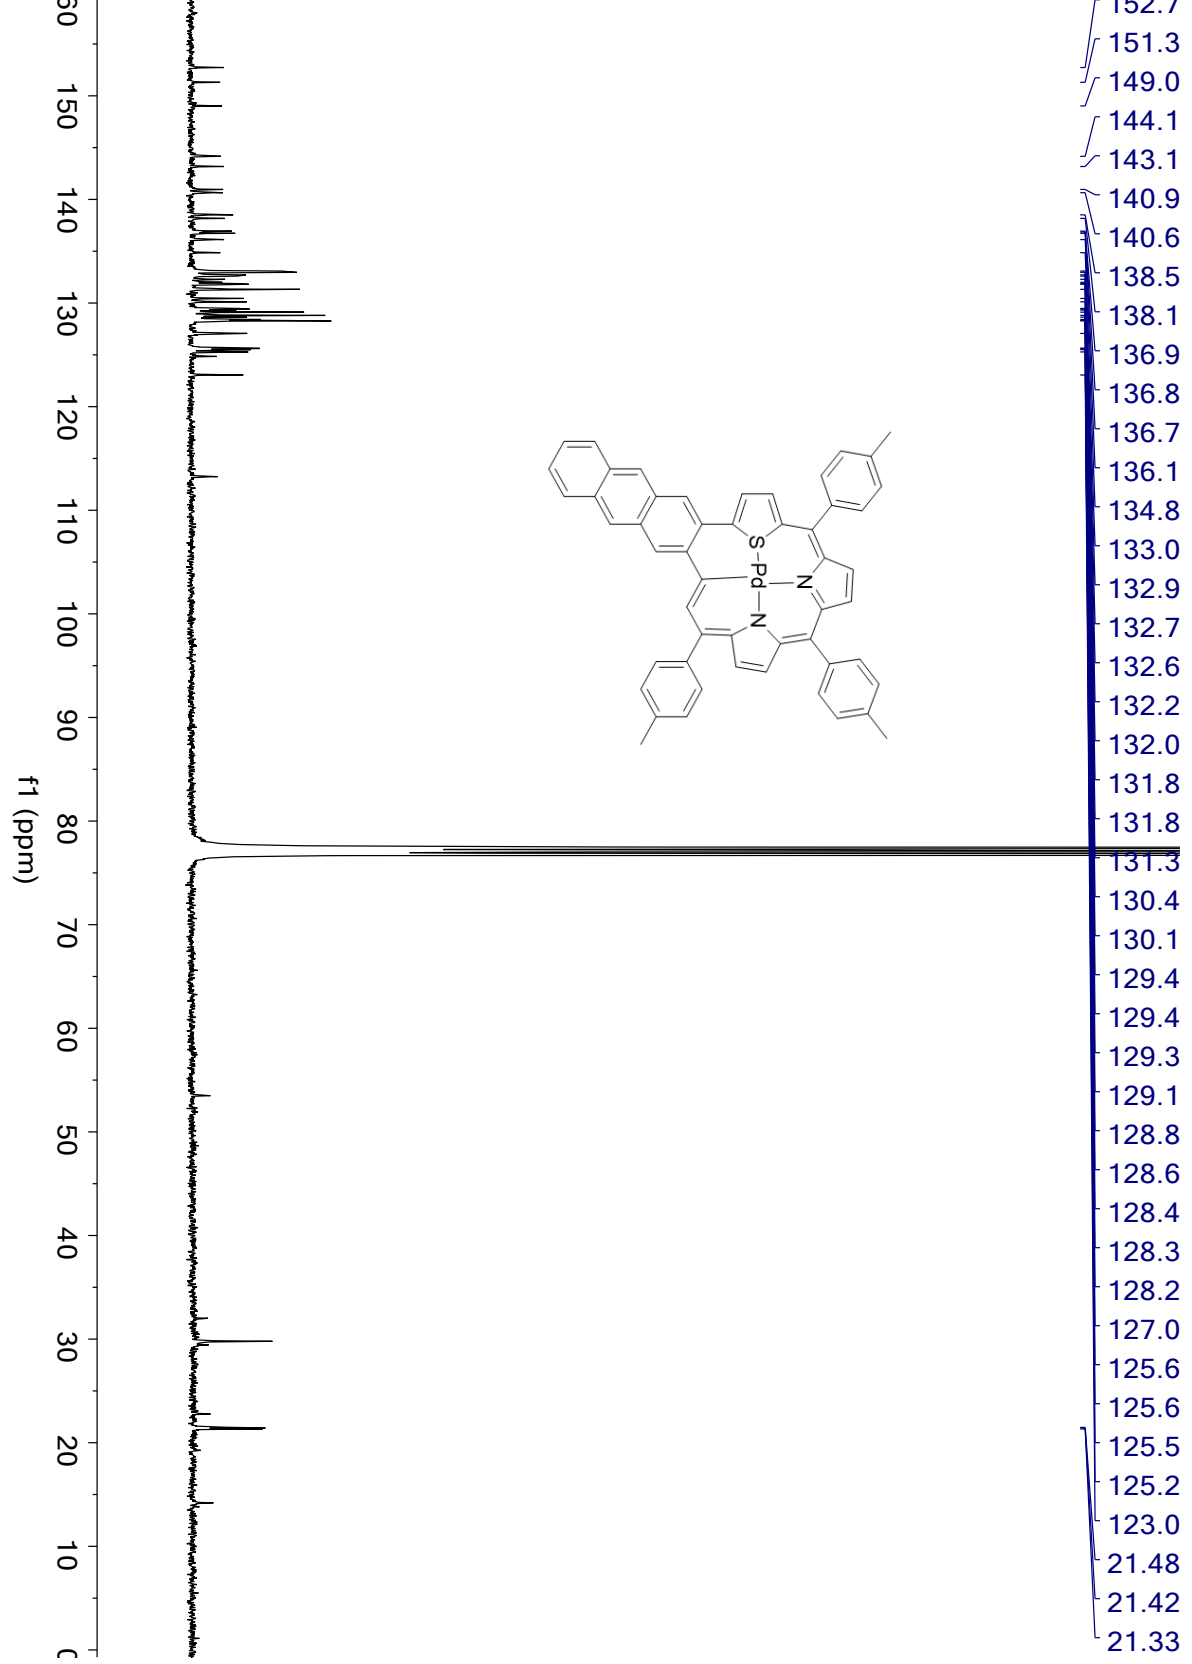

**Figure S42.**  $^{13}\text{C}$  NMR spectrum of **Pd-4b** recorded in  $\text{CDCl}_3$



## 7. Cartesian Coordinates of DFT-optimized Structures

**Table S4.** Cartesian coordinates (in Angstrom) of DFT-optimized structures without an imaginary structure

| <b>3a<sub>1</sub></b> |           |           |           | <b>3a<sub>2</sub></b> |           |           |           |
|-----------------------|-----------|-----------|-----------|-----------------------|-----------|-----------|-----------|
| C                     | -1.9169   | -2.356761 | 0.082002  | C                     | -2.534708 | 8.581746  | -0.633328 |
| C                     | -1.960223 | -3.719462 | 0.392061  | H                     | -3.540724 | 8.742193  | -0.233789 |
| H                     | -2.846188 | -4.195779 | 0.791152  | H                     | -2.512652 | 8.954691  | -1.661249 |
| C                     | -0.758141 | -4.397746 | 0.161264  | H                     | -1.850377 | 9.205837  | -0.044991 |
| H                     | -0.625196 | -5.449587 | 0.382412  | C                     | -4.357354 | -1.965396 | 0.403652  |
| C                     | 0.276974  | -3.599258 | -0.327313 | C                     | -5.120537 | -1.533258 | 1.500992  |
| C                     | 1.597657  | -4.118058 | -0.698568 | H                     | -4.700909 | -0.800998 | 2.183571  |
| C                     | 1.573444  | -5.450847 | -1.194419 | C                     | -6.399201 | -2.039744 | 1.728475  |
| H                     | 0.60883   | -5.896048 | -1.408038 | H                     | -6.964965 | -1.689063 | 2.587998  |
| C                     | 2.715067  | -6.192604 | -1.435129 | C                     | -6.965628 | -2.993688 | 0.872824  |
| H                     | 2.631916  | -7.201802 | -1.826618 | C                     | -6.204508 | -3.421963 | -0.224257 |
| C                     | 3.968784  | -5.629842 | -1.164631 | H                     | -6.623572 | -4.150868 | -0.913421 |
| H                     | 4.880242  | -6.196854 | -1.326573 | C                     | -4.923643 | -2.924871 | -0.453303 |
| C                     | 4.031738  | -4.328814 | -0.704226 | H                     | -4.360999 | -3.266385 | -1.316612 |
| H                     | 5.004342  | -3.885165 | -0.511847 | C                     | -8.339099 | -3.561862 | 1.137998  |
| C                     | 2.886908  | -3.508367 | -0.50944  | H                     | -8.280159 | -4.458555 | 1.767544  |
| C                     | 3.234064  | -2.15219  | -0.0963   | H                     | -8.838419 | -3.85105  | 0.208639  |
| H                     | 4.15867   | -2.107871 | 0.474736  | H                     | -8.976194 | -2.841391 | 1.65907   |
| C                     | 2.671416  | -0.952682 | -0.41491  | N                     | 0.976976  | 1.414566  | -0.272109 |
| H                     | 1.79266   | -0.930473 | -1.045947 | H                     | 0.346267  | 0.620671  | -0.155658 |
| C                     | 3.18504   | 0.338694  | -0.034106 | N                     | -1.634974 | 0.622368  | -0.08823  |
| C                     | 2.353733  | 1.454675  | -0.103907 | S                     | -0.299319 | -1.951035 | -0.471055 |
| C                     | 2.702602  | 2.855218  | -0.062871 |                       |           |           |           |
| H                     | 3.712772  | 3.227397  | 0.021502  |                       |           |           |           |
| C                     | 1.56111   | 3.592665  | -0.197528 |                       |           |           |           |
| H                     | 1.47905   | 4.668795  | -0.220902 |                       |           |           |           |
| C                     | 0.443433  | 2.683529  | -0.29812  |                       |           |           |           |
| C                     | -0.927436 | 2.967338  | -0.327247 |                       |           |           |           |
| C                     | -1.91665  | 1.938086  | -0.23975  |                       |           |           |           |
| C                     | -3.361937 | 2.149722  | -0.283271 |                       |           |           |           |
| H                     | -3.858897 | 3.097695  | -0.430057 |                       |           |           |           |
| C                     | -3.935687 | 0.929774  | -0.119413 |                       |           |           |           |
| H                     | -4.98955  | 0.692253  | -0.117011 |                       |           |           |           |
| C                     | -2.844273 | -0.031021 | 0.005109  |                       |           |           |           |
| C                     | -2.993264 | -1.413475 | 0.155475  |                       |           |           |           |
| C                     | 4.589198  | 0.509607  | 0.417428  |                       |           |           |           |
| C                     | 5.660911  | -0.020519 | -0.326271 |                       |           |           |           |
| H                     | 5.45359   | -0.560832 | -1.244721 |                       |           |           |           |
| C                     | 6.978221  | 0.162156  | 0.082777  |                       |           |           |           |
| H                     | 7.784627  | -0.24553  | -0.521923 |                       |           |           |           |
| C                     | 7.285956  | 0.871357  | 1.254119  |                       |           |           |           |
| C                     | 6.221182  | 1.396699  | 1.996549  |                       |           |           |           |
| H                     | 6.427271  | 1.947789  | 2.910676  |                       |           |           |           |
| C                     | 4.899061  | 1.218889  | 1.590871  |                       |           |           |           |
| H                     | 4.092991  | 1.622209  | 2.195846  |                       |           |           |           |
| C                     | 8.715923  | 1.036777  | 1.708733  |                       |           |           |           |
| H                     | 9.061807  | 0.150289  | 2.254925  |                       |           |           |           |
| H                     | 8.826843  | 1.895399  | 2.376749  |                       |           |           |           |
| H                     | 9.391732  | 1.174768  | 0.859089  |                       |           |           |           |
| C                     | -1.349904 | 4.394921  | -0.407176 |                       |           |           |           |
| C                     | -0.948061 | 5.207883  | -1.480108 |                       |           |           |           |
| H                     | -0.340997 | 4.779503  | -2.272245 |                       |           |           |           |
| C                     | -1.334301 | 6.545757  | -1.554963 |                       |           |           |           |
| H                     | -1.013068 | 7.14559   | -2.402957 |                       |           |           |           |
| C                     | -2.138754 | 7.125978  | -0.565887 |                       |           |           |           |
| C                     | -2.545757 | 6.314056  | 0.502265  |                       |           |           |           |
| H                     | -3.170107 | 6.735657  | 1.286356  |                       |           |           |           |
| C                     | -2.158026 | 4.978149  | 0.584209  |                       |           |           |           |
| H                     | -2.476126 | 4.378072  | 1.431391  |                       |           |           |           |

|   |           |           |           |
|---|-----------|-----------|-----------|
| H | 4.746731  | -1.049027 | -1.99137  |
| C | 6.665032  | -0.494202 | -1.19872  |
| H | 7.207479  | -0.945096 | -2.026218 |
| C | 7.378736  | 0.143173  | 0.172002  |
| C | 6.645772  | 0.713416  | -0.875285 |
| H | 7.171541  | 1.203859  | 1.69065   |
| C | 5.251448  | 0.657489  | 0.896472  |
| H | 4.708138  | 1.097793  | 1.727235  |
| C | 8.886156  | 0.223209  | -0.210562 |
| H | 9.330243  | -0.733447 | -0.504204 |
| H | 9.296564  | 0.504031  | 0.76314   |
| H | 9.224004  | 0.9705    | -0.939024 |
| C | -0.913704 | 4.637398  | -0.015109 |
| C | -1.732833 | 5.201454  | -1.008125 |
| H | -2.193711 | 4.554127  | -1.748234 |
| C | -1.950431 | 6.577247  | -1.066515 |
| H | -2.588187 | 6.982111  | -1.848556 |
| C | -1.355767 | 7.447972  | -0.143533 |
| C | -0.54035  | 6.886999  | 0.848624  |
| H | -0.075681 | 7.534606  | 1.588286  |
| C | -0.324362 | 5.511429  | 0.914673  |
| H | 0.294403  | 5.102796  | 1.708125  |
| C | -1.565412 | 8.941067  | -0.228911 |
| H | -1.563195 | 9.402793  | 0.763116  |
| H | -2.513793 | 9.184947  | -0.716201 |
| H | -0.767845 | 9.420424  | -0.810389 |
| C | -4.426287 | -1.611047 | 0.100013  |
| C | -5.301587 | -1.102144 | -0.880463 |
| H | -4.997739 | -0.244323 | -1.470518 |
| C | -6.528047 | -1.710603 | -1.131957 |
| H | -7.175802 | -1.301426 | -1.90302  |
| C | -6.933125 | -2.853362 | -0.428162 |
| C | -6.054447 | -3.37436  | 0.534124  |
| H | -6.338833 | -4.263712 | 1.09085   |
| C | -4.828176 | -2.772434 | 0.792052  |
| H | -4.174147 | -3.188494 | 1.551972  |
| C | -8.274377 | -3.495204 | -0.684757 |
| H | -9.029944 | -3.120557 | 0.017328  |
| H | -8.22864  | -4.581187 | -0.56003  |
| H | -8.634308 | -3.280393 | -1.694864 |
| N | 0.980361  | 1.350803  | 0.035281  |
| H | 0.232777  | 0.661565  | 0.158638  |
| N | -1.649689 | 0.939815  | 0.246421  |
| S | -1.454772 | -3.140155 | -0.300893 |

**3a<sub>3</sub>**

|   |           |           |           |
|---|-----------|-----------|-----------|
| C | -2.091362 | -1.709808 | 0.693341  |
| C | -1.176896 | -1.58335  | 1.722725  |
| H | -1.291    | -0.844583 | 2.507496  |
| C | -0.096547 | -2.491242 | 1.64802   |
| H | 0.716571  | -2.522457 | 2.363208  |
| C | -0.147308 | -3.320011 | 0.549272  |
| C | 0.845376  | -4.303919 | 0.103399  |
| C | 0.426772  | -5.620393 | -0.160273 |
| H | -0.62782  | -5.858346 | -0.057884 |
| C | 1.329996  | -6.622806 | -0.495477 |
| H | 0.976915  | -7.632966 | -0.677908 |
| C | 2.694771  | -6.323433 | -0.560727 |
| H | 3.416705  | -7.09852  | -0.799122 |
| C | 3.124325  | -5.025238 | -0.326548 |
| H | 4.182938  | -4.792935 | -0.403375 |
| C | 2.22735   | -3.969412 | -0.033551 |
| C | 2.831644  | -2.639587 | 0.042833  |
| H | 3.910897  | -2.679838 | 0.168483  |
| C | 2.287647  | -1.39523  | -0.112109 |
| H | 1.220909  | -1.273598 | -0.246474 |
| C | 3.044111  | -0.170704 | -0.092065 |
| C | 2.399749  | 1.069872  | -0.074987 |

|   |           |           |           |
|---|-----------|-----------|-----------|
| C | 3.049755  | 2.368084  | -0.238002 |
| H | 4.107928  | 2.528119  | -0.386336 |
| C | 2.066369  | 3.302558  | -0.216034 |
| H | 2.167972  | 4.371132  | -0.340122 |
| C | 0.808589  | 2.578659  | -0.021502 |
| C | -0.489101 | 3.187078  | 0.037304  |
| C | -1.650397 | 2.414666  | 0.150011  |
| C | -3.042378 | 2.812283  | 0.213163  |
| H | -3.3893   | 3.834938  | 0.216189  |
| C | -3.808389 | 1.684602  | 0.28161   |
| H | -4.883663 | 1.634305  | 0.367405  |
| C | -2.929782 | 0.531932  | 0.295123  |
| C | -3.209042 | -0.825682 | 0.378092  |
| C | 4.534228  | -0.205994 | -0.091086 |
| C | 5.246721  | -0.836363 | -1.12776  |
| H | 4.699677  | -1.303718 | -1.940924 |
| C | 6.638613  | -0.852182 | -1.13427  |
| H | 7.161846  | -1.337498 | -1.954607 |
| C | 7.37791   | -0.24993  | -0.104653 |
| C | 6.669159  | 0.367908  | 0.932459  |
| H | 7.214837  | 0.833466  | 1.749286  |
| C | 5.274108  | 0.393383  | 0.940393  |
| H | 4.748674  | 0.871352  | 1.761463  |
| C | 8.88766   | -0.255285 | -0.129695 |
| H | 9.279905  | -1.238593 | -0.408847 |
| H | 9.304549  | 0.013063  | 0.844769  |
| H | 9.273322  | 0.463601  | -0.862956 |
| C | -0.618089 | 4.669719  | -0.041501 |
| C | -1.373579 | 5.28439   | -1.053925 |
| H | -1.851135 | 4.667364  | -1.809317 |
| C | -1.506981 | 6.671521  | -1.11296  |
| H | -2.098748 | 7.115636  | -1.909709 |
| C | -0.884702 | 7.50211   | -0.172504 |
| C | -0.128613 | 6.890402  | 0.837459  |
| H | 0.356693  | 7.507564  | 1.589772  |
| C | 0.002028  | 5.504722  | 0.904526  |
| H | 0.578191  | 5.058373  | 1.709629  |
| C | -1.000949 | 9.005462  | -0.257079 |
| H | -1.007418 | 9.462838  | 0.737011  |
| H | -1.91449  | 9.307526  | -0.777254 |
| H | -0.1552   | 9.438114  | -0.806143 |
| C | -4.547247 | -1.382459 | 0.122163  |
| C | -5.423949 | -0.828494 | -0.832047 |
| H | -5.095228 | 0.012118  | -1.433845 |
| C | -6.687557 | -1.372119 | -1.047606 |
| H | -7.335644 | -0.92716  | -1.798427 |
| C | -7.129499 | -2.49626  | -0.336712 |
| C | -6.248976 | -3.064953 | 0.596503  |
| H | -6.559871 | -3.942794 | 1.157543  |
| C | -4.987805 | -2.525092 | 0.821917  |
| H | -4.333202 | -2.978045 | 1.560106  |
| C | -8.507772 | -3.070084 | -0.556649 |
| H | -9.216055 | -2.693071 | 0.191941  |
| H | -8.504672 | -4.161354 | -0.47561  |
| H | -8.900582 | -2.801063 | -1.541207 |
| N | 1.033373  | 1.247902  | 0.052031  |
| H | -0.752367 | 0.549134  | 0.188982  |
| N | -1.644981 | 1.047765  | 0.228855  |
| S | -1.60004  | -3.015481 | -0.380811 |

**3a<sub>4</sub>**

|   |           |           |           |
|---|-----------|-----------|-----------|
| C | -2.033857 | -2.229878 | 0.106939  |
| C | -1.972327 | -3.380041 | 0.882362  |
| H | -2.758523 | -3.651324 | 1.576249  |
| C | -0.77767  | -4.111028 | 0.727915  |
| H | -0.552144 | -5.012393 | 1.28608   |
| C | 0.125391  | -3.55712  | -0.164919 |
| C | 1.388188  | -4.19701  | -0.57634  |

|   |           |           |           |
|---|-----------|-----------|-----------|
| C | 1.245935  | -5.564285 | -0.911649 |
| H | 0.24381   | -5.979123 | -0.923467 |
| C | 2.317892  | -6.377358 | -1.248477 |
| H | 2.149001  | -7.416814 | -1.512127 |
| C | 3.606926  | -5.836862 | -1.249782 |
| H | 4.465797  | -6.44829  | -1.508952 |
| C | 3.779684  | -4.50634  | -0.911887 |
| H | 4.784959  | -4.095345 | -0.90319  |
| C | 2.709203  | -3.632593 | -0.578034 |
| C | 3.162562  | -2.291269 | -0.218814 |
| H | 4.231038  | -2.264424 | -0.021514 |
| C | 2.516562  | -1.092706 | -0.152442 |
| H | 1.462654  | -1.022554 | -0.368381 |
| C | 3.130243  | 0.169725  | 0.16023   |
| C | 2.345834  | 1.32458   | 0.166662  |
| C | 2.823605  | 2.697736  | 0.298837  |
| H | 3.850534  | 2.995009  | 0.455993  |
| C | 1.739118  | 3.501666  | 0.155912  |
| H | 1.707468  | 4.581205  | 0.191677  |
| C | 0.59077   | 2.616037  | -0.055082 |
| C | -0.76775  | 3.041443  | -0.222973 |
| C | -1.82021  | 2.120444  | -0.262251 |
| C | -3.2359   | 2.344884  | -0.449446 |
| H | -3.683536 | 3.308251  | -0.642109 |
| C | -3.875095 | 1.143531  | -0.358765 |
| H | -4.932512 | 0.960375  | -0.475138 |
| C | -2.889958 | 0.10858   | -0.121283 |
| C | -3.10232  | -1.252695 | 0.068347  |
| C | 4.587555  | 0.274903  | 0.451923  |
| C | 5.553138  | -0.09387  | -0.501854 |
| H | 5.231335  | -0.45764  | -1.473003 |
| C | 6.913105  | 0.022278  | -0.225599 |
| H | 7.636609  | -0.261829 | -0.985957 |
| C | 7.365858  | 0.503327  | 1.01209   |
| C | 6.404081  | 0.864601  | 1.963161  |
| H | 6.724593  | 1.233592  | 2.934151  |
| C | 5.040197  | 0.755996  | 1.690236  |
| H | 4.314792  | 1.034944  | 2.448412  |
| C | 8.842369  | 0.644097  | 1.295579  |
| H | 9.401758  | -0.229185 | 0.94491   |
| H | 9.034238  | 0.764199  | 2.365218  |
| H | 9.261247  | 1.519829  | 0.784843  |
| C | -1.075805 | 4.494604  | -0.33409  |
| C | -0.489522 | 5.283955  | -1.339534 |
| H | 0.186292  | 4.819971  | -2.051783 |
| C | -0.77816  | 6.642649  | -1.448217 |
| H | -0.315579 | 7.223284  | -2.242733 |
| C | -1.663499 | 7.271653  | -0.561333 |
| C | -2.251607 | 6.486184  | 0.438144  |
| H | -2.940858 | 6.94568   | 1.142432  |
| C | -1.961659 | 5.127001  | 0.554444  |
| H | -2.416836 | 4.548098  | 1.352472  |
| C | -1.951369 | 8.750436  | -0.665951 |
| H | -2.92419  | 9.000211  | -0.232785 |
| H | -1.944867 | 9.086159  | -1.70739  |
| H | -1.195569 | 9.339929  | -0.131889 |
| C | -4.479053 | -1.756513 | 0.305353  |
| C | -5.350764 | -1.128222 | 1.213072  |
| H | -5.003696 | -0.267492 | 1.775458  |
| C | -6.642543 | -1.609821 | 1.419975  |
| H | -7.290319 | -1.104354 | 2.131699  |
| C | -7.11492  | -2.740066 | 0.741368  |
| C | -6.242624 | -3.374326 | -0.15699  |
| H | -6.583677 | -4.249703 | -0.704196 |
| C | -4.952139 | -2.900259 | -0.36722  |
| H | -4.302748 | -3.406076 | -1.074687 |
| C | -8.502575 | -3.280281 | 0.988188  |
| H | -8.478487 | -4.127198 | 1.685223  |
| H | -8.961577 | -3.639862 | 0.061964  |

|   |           |           |           |
|---|-----------|-----------|-----------|
| H | -9.157417 | -2.518991 | 1.420911  |
| N | 0.97732   | 1.325453  | -0.035859 |
| H | -0.72592  | 0.388766  | 0.039046  |
| N | -1.666559 | 0.762588  | -0.105105 |
| S | -0.577147 | -2.117488 | -0.874845 |

---



---

**3a<sub>g</sub>**

---



---

|   |           |           |           |
|---|-----------|-----------|-----------|
| C | -2.619962 | -1.974641 | 0.068142  |
| C | -3.010846 | -3.30989  | 0.225459  |
| H | -3.98505  | -3.587952 | 0.60646   |
| C | -2.024357 | -4.239352 | -0.117269 |
| H | -2.171862 | -5.307079 | -0.013811 |
| C | -0.821482 | -3.668897 | -0.54177  |
| C | 0.403973  | -4.371835 | -0.891786 |
| C | 0.310728  | -5.767037 | -1.131287 |
| H | -0.670049 | -6.22688  | -1.169049 |
| C | 1.425172  | -6.560201 | -1.331434 |
| H | 1.305581  | -7.622515 | -1.521135 |
| C | 2.702342  | -5.981923 | -1.301745 |
| H | 3.586877  | -6.588854 | -1.468777 |
| C | 2.825258  | -4.618099 | -1.100751 |
| H | 3.80975   | -4.16441  | -1.139887 |
| C | 1.706555  | -3.770051 | -0.915457 |
| C | 1.954542  | -2.334485 | -0.769084 |
| H | 1.314386  | -1.646855 | -1.308825 |
| C | 3.016223  | -1.842456 | -0.063374 |
| H | 3.648279  | -2.580824 | 0.425247  |
| C | 3.474792  | -0.491796 | 0.112683  |
| C | 2.752641  | 0.692042  | -0.083212 |
| C | 3.333407  | 2.005856  | -0.216276 |
| H | 4.394945  | 2.19839   | -0.224116 |
| C | 2.333228  | 2.917667  | -0.374761 |
| H | 2.437374  | 3.983047  | -0.509811 |
| C | 1.072897  | 2.224596  | -0.322861 |
| C | -0.196404 | 2.814027  | -0.322577 |
| C | -1.419917 | 2.107132  | -0.13599  |
| C | -2.742996 | 2.727666  | -0.129474 |
| H | -2.951405 | 3.776588  | -0.281705 |
| C | -3.634761 | 1.726676  | 0.08732   |
| H | -4.711832 | 1.799184  | 0.128823  |
| C | -2.858348 | 0.49632   | 0.183521  |
| C | -3.396206 | -0.795984 | 0.268196  |
| C | 4.887902  | -0.369532 | 0.573547  |
| C | 5.904859  | -1.135006 | -0.025769 |
| H | 5.661706  | -1.777582 | -0.866967 |
| C | 7.223033  | -1.057704 | 0.417555  |
| H | 7.987307  | -1.650894 | -0.078393 |
| C | 7.583671  | -0.221921 | 1.483441  |
| C | 6.571647  | 0.537204  | 2.087171  |
| H | 6.817847  | 1.188195  | 2.922443  |
| C | 5.252046  | 0.463699  | 1.647481  |
| H | 4.486795  | 1.044064  | 2.153025  |
| C | 9.006474  | -0.163337 | 1.984694  |
| H | 9.162379  | -0.865059 | 2.813684  |
| H | 9.259499  | 0.834607  | 2.355053  |
| H | 9.718732  | -0.426875 | 1.197613  |
| C | -0.258646 | 4.299761  | -0.499373 |
| C | 0.103766  | 4.899041  | -1.715486 |
| H | 0.426263  | 4.272068  | -2.541759 |
| C | 0.040311  | 6.282678  | -1.88098  |
| H | 0.319812  | 6.718349  | -2.837121 |
| C | -0.386495 | 7.119163  | -0.841424 |
| C | -0.753161 | 6.519289  | 0.371323  |
| H | -1.090273 | 7.142858  | 1.195749  |
| C | -0.689378 | 5.137189  | 0.541944  |
| H | -0.973492 | 4.698633  | 1.49404   |
| C | -0.427346 | 8.619215  | -1.011993 |
| H | -1.241652 | 9.065762  | -0.433552 |

|   |           |           |           |
|---|-----------|-----------|-----------|
| H | -0.560495 | 8.898745  | -2.061038 |
| H | 0.505865  | 9.082246  | -0.667563 |
| C | -4.851886 | -0.9583   | 0.542294  |
| C | -5.434892 | -0.376473 | 1.680599  |
| H | -4.809502 | 0.179591  | 2.371959  |
| C | -6.797855 | -0.514949 | 1.937728  |
| H | -7.220097 | -0.056995 | 2.828665  |
| C | -7.631001 | -1.235688 | 1.072204  |
| C | -7.049177 | -1.811884 | -0.066301 |
| H | -7.673592 | -2.363846 | -0.764397 |
| C | -5.686949 | -1.682691 | -0.326038 |
| H | -5.266333 | -2.127058 | -1.222652 |
| C | -9.101381 | -1.408917 | 1.367556  |
| H | -9.283986 | -2.330872 | 1.933692  |
| H | -9.689122 | -1.473074 | 0.447086  |
| H | -9.489915 | -0.578947 | 1.964577  |
| N | 1.377106  | 0.877695  | -0.193241 |
| H | 0.645284  | 0.201544  | 0.003727  |
| N | -1.516089 | 0.771272  | 0.054054  |
| S | -0.954954 | -1.925444 | -0.498455 |

---

**3a<sub>g</sub>**

---

|   |           |           |           |
|---|-----------|-----------|-----------|
| C | -2.643465 | -1.987092 | 0.027466  |
| C | -2.931885 | -3.300983 | 0.402921  |
| H | -3.811877 | -3.561454 | 0.977331  |
| C | -1.946313 | -4.229722 | 0.029021  |
| H | -1.992202 | -5.278046 | 0.299294  |
| C | -0.857937 | -3.674749 | -0.639965 |
| C | 0.36583   | -4.339823 | -1.066585 |
| C | 0.281529  | -5.724284 | -1.347292 |
| H | -0.696272 | -6.194172 | -1.34511  |
| C | 1.398652  | -6.486809 | -1.642868 |
| H | 1.28975   | -7.543716 | -1.866096 |
| C | 2.66057   | -5.87913  | -1.672532 |
| H | 3.54477   | -6.457456 | -1.922531 |
| C | 2.771589  | -4.522555 | -1.41349  |
| H | 3.745023  | -4.04925  | -1.483119 |
| C | 1.653499  | -3.707085 | -1.1156   |
| C | 1.895882  | -2.284896 | -0.851129 |
| H | 1.219677  | -1.534683 | -1.236986 |
| C | 2.982217  | -1.855643 | -0.14457  |
| H | 3.641782  | -2.628522 | 0.243865  |
| C | 3.418156  | -0.518219 | 0.159343  |
| C | 2.700823  | 0.682538  | 0.013497  |
| C | 3.360927  | 1.988947  | 0.015211  |
| H | 4.423185  | 2.156442  | 0.111619  |
| C | 2.396147  | 2.916358  | -0.189669 |
| H | 2.511734  | 3.988037  | -0.255113 |
| C | 1.135433  | 2.184463  | -0.279561 |
| C | -0.130949 | 2.841476  | -0.363721 |
| C | -1.360607 | 2.187355  | -0.225454 |
| C | -2.690406 | 2.740114  | -0.267241 |
| H | -2.917445 | 3.777212  | -0.460853 |
| C | -3.581388 | 1.729546  | -0.041834 |
| H | -4.65838  | 1.801851  | -0.036538 |
| C | -2.854124 | 0.494459  | 0.11348   |
| C | -3.396246 | -0.789017 | 0.244058  |
| C | 4.805355  | -0.444457 | 0.703937  |
| C | 5.861916  | -1.14033  | 0.086829  |
| H | 5.67262   | -1.694342 | -0.828024 |
| C | 7.152623  | -1.100237 | 0.606426  |
| H | 7.950063  | -1.632738 | 0.093865  |
| C | 7.444494  | -0.379544 | 1.773996  |
| C | 6.393305  | 0.305891  | 2.396182  |
| H | 6.586289  | 0.867048  | 3.307101  |
| C | 5.100549  | 0.274758  | 1.875939  |
| H | 4.302131  | 0.798692  | 2.391376  |
| C | 8.83849   | -0.369113 | 2.353399  |

|   |           |           |           |
|---|-----------|-----------|-----------|
| H | 9.017116  | -1.259254 | 2.969544  |
| H | 9.000887  | 0.505538  | 2.989463  |
| H | 9.598474  | -0.36523  | 1.566012  |
| C | -0.156815 | 4.321666  | -0.569288 |
| C | 0.375426  | 4.893912  | -1.737124 |
| H | 0.805205  | 4.247404  | -2.496606 |
| C | 0.345104  | 6.272152  | -1.940554 |
| H | 0.757321  | 6.684002  | -2.858515 |
| C | -0.216284 | 7.135319  | -0.988951 |
| C | -0.749072 | 6.565255  | 0.174304  |
| H | -1.189651 | 7.208975  | 0.931698  |
| C | -0.717899 | 5.186549  | 0.383828  |
| H | -1.125702 | 4.773908  | 1.301912  |
| C | -0.221178 | 8.630677  | -1.200164 |
| H | -1.036862 | 9.109695  | -0.650965 |
| H | -0.327034 | 8.884812  | -2.259158 |
| H | 0.715802  | 9.08278   | -0.851442 |
| C | -4.831131 | -0.922804 | 0.611484  |
| C | -5.366384 | -0.226547 | 1.70923   |
| H | -4.715409 | 0.403141  | 2.30749   |
| C | -6.712862 | -0.34739  | 2.048276  |
| H | -7.096983 | 0.200958  | 2.904677  |
| C | -7.576513 | -1.168926 | 1.312516  |
| C | -7.042009 | -1.865409 | 0.218117  |
| H | -7.691313 | -2.500472 | -0.379357 |
| C | -5.697968 | -1.751253 | -0.124836 |
| H | -5.314811 | -2.291788 | -0.984564 |
| C | -9.027625 | -1.322848 | 1.698705  |
| H | -9.175972 | -2.206711 | 2.331637  |
| H | -9.664502 | -1.447071 | 0.817675  |
| H | -9.385973 | -0.455889 | 2.260724  |
| N | 1.340649  | 0.844022  | -0.179259 |
| H | -0.683677 | 0.254067  | 0.108462  |
| N | -1.511404 | 0.837151  | -0.005601 |
| S | -1.117453 | -1.967962 | -0.844948 |

---

**3b<sub>1</sub>**

---

|   |           |           |           |
|---|-----------|-----------|-----------|
| C | -1.964723 | -2.341356 | 0.07105   |
| C | -2.049807 | -3.719212 | 0.302172  |
| H | -2.961305 | -4.196342 | 0.637217  |
| C | -0.856562 | -4.411476 | 0.079038  |
| H | -0.759443 | -5.476832 | 0.247587  |
| C | 0.217352  | -3.611035 | -0.319474 |
| C | 1.540246  | -4.140145 | -0.649714 |
| C | 1.533124  | -5.471068 | -1.150568 |
| H | 0.582425  | -5.920655 | -1.411867 |
| C | 2.692698  | -6.194337 | -1.32715  |
| H | 2.673161  | -7.204441 | -1.721985 |
| C | 3.898459  | -5.582151 | -0.958306 |
| H | 4.839717  | -6.126495 | -1.015936 |
| N | 3.965581  | -4.331782 | -0.536013 |
| C | 2.841504  | -3.559651 | -0.440751 |
| C | 3.219201  | -2.201532 | -0.073763 |
| H | 4.171383  | -2.186263 | 0.447414  |
| C | 2.661372  | -0.999907 | -0.397368 |
| H | 1.763713  | -0.9764   | -1.000829 |
| C | 3.200928  | 0.288304  | -0.054036 |
| C | 2.381487  | 1.41519   | -0.126126 |
| C | 2.749646  | 2.810604  | -0.103742 |
| H | 3.766049  | 3.169712  | -0.042226 |
| C | 1.615021  | 3.562337  | -0.219111 |
| H | 1.546426  | 4.639217  | -0.248214 |
| C | 0.484853  | 2.667363  | -0.292046 |
| C | -0.882849 | 2.969316  | -0.301284 |
| C | -1.8864   | 1.956531  | -0.205297 |
| C | -3.327892 | 2.194096  | -0.238603 |
| H | -3.807994 | 3.152291  | -0.37398  |
| C | -3.921982 | 0.982975  | -0.085277 |

|   |           |           |           |
|---|-----------|-----------|-----------|
| H | -4.979682 | 0.76352   | -0.07987  |
| C | -2.846507 | 0.002167  | 0.024449  |
| C | -3.022211 | -1.38038  | 0.151441  |
| C | 4.614415  | 0.448477  | 0.371325  |
| C | 5.665945  | -0.115739 | -0.377263 |
| H | 5.43595   | -0.678879 | -1.276155 |
| C | 6.991103  | 0.053614  | 0.008054  |
| H | 7.780803  | -0.385364 | -0.596806 |
| C | 7.328238  | 0.784654  | 1.158677  |
| C | 6.284231  | 1.339502  | 1.907431  |
| H | 6.513007  | 1.901583  | 2.809247  |
| C | 4.952636  | 1.175396  | 1.525062  |
| H | 4.162712  | 1.599892  | 2.136793  |
| C | 8.770957  | 0.95704   | 1.568191  |
| H | 9.253084  | -0.011722 | 1.74155   |
| H | 8.858766  | 1.544703  | 2.485648  |
| H | 9.347665  | 1.464888  | 0.786665  |
| C | -1.285798 | 4.403209  | -0.374789 |
| C | -0.894753 | 5.208812  | -1.456927 |
| H | -0.310654 | 4.771197  | -2.261164 |
| C | -1.263486 | 6.552024  | -1.524892 |
| H | -0.951865 | 7.146691  | -2.380016 |
| C | -2.038002 | 7.14436   | -0.519283 |
| C | -2.433888 | 6.339367  | 0.558316  |
| H | -3.035198 | 6.770595  | 1.355027  |
| C | -2.064266 | 4.997993  | 0.633159  |
| H | -2.373323 | 4.402765  | 1.487115  |
| C | -2.414447 | 8.605549  | -0.579593 |
| H | -3.413945 | 8.77891   | -0.169196 |
| H | -2.397866 | 8.980369  | -1.606871 |
| H | -1.715504 | 9.218504  | 0.003168  |
| C | -4.400848 | -1.908966 | 0.374044  |
| C | -5.155093 | -1.502216 | 1.486938  |
| H | -4.719434 | -0.807657 | 2.198389  |
| C | -6.446415 | -1.985334 | 1.692186  |
| H | -7.005437 | -1.654875 | 2.564027  |
| C | -7.034346 | -2.889994 | 0.798155  |
| C | -6.282022 | -3.292013 | -0.314538 |
| H | -6.717548 | -3.981628 | -1.033245 |
| C | -4.988728 | -2.817416 | -0.522314 |
| H | -4.433621 | -3.136649 | -1.398988 |
| C | -8.422121 | -3.433697 | 1.038977  |
| H | -8.388457 | -4.343257 | 1.65167   |
| H | -8.918217 | -3.693919 | 0.099474  |
| H | -9.048941 | -2.710047 | 1.568155  |
| N | 1.00213   | 1.391884  | -0.266243 |
| H | 0.363774  | 0.606045  | -0.142114 |
| N | -1.626809 | 0.634035  | -0.064918 |
| S | -0.316759 | -1.942871 | -0.388011 |

### 3b<sub>2</sub>

|   |           |           |           |
|---|-----------|-----------|-----------|
| C | -1.985522 | -1.81302  | 0.728178  |
| C | -1.056883 | -1.600407 | 1.732459  |
| H | -1.190342 | -0.828742 | 2.479996  |
| C | 0.05748   | -2.461058 | 1.674745  |
| H | 0.88659   | -2.425698 | 2.371174  |
| C | 0.026751  | -3.333305 | 0.605452  |
| C | 1.066658  | -4.262836 | 0.165959  |
| C | 0.740276  | -5.6033   | -0.099626 |
| H | -0.294787 | -5.920888 | -0.013761 |
| C | 1.732766  | -6.519286 | -0.413837 |
| H | 1.501303  | -7.561476 | -0.604754 |
| C | 3.055722  | -6.063254 | -0.426912 |
| H | 3.87374   | -6.757589 | -0.612251 |
| N | 3.397478  | -4.79542  | -0.224992 |
| C | 2.432384  | -3.866315 | 0.015642  |
| C | 2.97496   | -2.510387 | 0.054981  |
| H | 4.056372  | -2.523789 | 0.148072  |

|   |           |           |           |
|---|-----------|-----------|-----------|
| C | 2.365634  | -1.296782 | -0.114358 |
| H | 1.290098  | -1.260485 | -0.24228  |
| C | 3.049425  | -0.033678 | -0.125819 |
| C | 2.350153  | 1.174438  | -0.107627 |
| C | 2.887495  | 2.508063  | -0.277419 |
| H | 3.932461  | 2.723123  | -0.441939 |
| C | 1.860161  | 3.404094  | -0.23775  |
| H | 1.923023  | 4.474696  | -0.36233  |
| C | 0.630604  | 2.674689  | -0.025666 |
| C | -0.680214 | 3.159772  | 0.060701  |
| C | -1.794889 | 2.268713  | 0.197166  |
| C | -3.211942 | 2.633318  | 0.277957  |
| H | -3.61027  | 3.638001  | 0.295409  |
| C | -3.908402 | 1.466967  | 0.335345  |
| H | -4.977633 | 1.342532  | 0.433147  |
| C | -2.919477 | 0.391872  | 0.330643  |
| C | -3.132122 | -0.985346 | 0.395206  |
| C | 4.540175  | 0.018971  | -0.144661 |
| C | 5.271148  | -0.570264 | -1.191921 |
| H | 4.739267  | -1.069236 | -1.996257 |
| C | 6.661329  | -0.506597 | -1.219393 |
| H | 7.198814  | -0.960274 | -2.048509 |
| C | 7.38071   | 0.137617  | -0.201144 |
| C | 6.653635  | 0.721065  | 0.843032  |
| H | 7.183716  | 1.224901  | 1.647366  |
| C | 5.259757  | 0.66285   | 0.873922  |
| H | 4.720935  | 1.115214  | 1.701165  |
| C | 8.889923  | 0.177182  | -0.225457 |
| H | 9.315485  | -0.790373 | 0.067669  |
| H | 9.281633  | 0.930899  | 0.462976  |
| H | 9.267346  | 0.402266  | -1.228167 |
| C | -0.91027  | 4.630012  | -0.008289 |
| C | -1.730202 | 5.193458  | -1.000848 |
| H | -2.192643 | 4.545976  | -1.739821 |
| C | -1.946087 | 6.569418  | -1.06023  |
| H | -2.584132 | 6.974379  | -1.841926 |
| C | -1.349557 | 7.44014   | -0.138404 |
| C | -0.53361  | 6.879313  | 0.853404  |
| H | -0.067478 | 7.527066  | 1.591947  |
| C | -0.318522 | 5.503666  | 0.920144  |
| H | 0.30105   | 5.09497   | 1.712909  |
| C | -1.557899 | 8.933306  | -0.224683 |
| H | -1.555196 | 9.395605  | 0.767046  |
| H | -2.50599  | 9.177699  | -0.712216 |
| H | -0.759762 | 9.411297  | -0.806449 |
| C | -4.429854 | -1.611617 | 0.096526  |
| C | -5.299992 | -1.096834 | -0.885488 |
| H | -4.992497 | -0.236594 | -1.470072 |
| C | -6.525824 | -1.702856 | -1.145264 |
| H | -7.169712 | -1.289611 | -1.917332 |
| C | -6.935274 | -2.84828  | -0.448239 |
| C | -6.061768 | -3.374677 | 0.515849  |
| H | -6.350012 | -4.265894 | 1.067504  |
| C | -4.835986 | -2.775467 | 0.781935  |
| H | -4.186369 | -3.195257 | 1.543579  |
| C | -8.27609  | -3.487223 | -0.713569 |
| H | -9.034305 | -3.11329  | -0.013999 |
| H | -8.232666 | -4.573597 | -0.591751 |
| H | -8.630677 | -3.268665 | -1.724735 |
| N | 0.982815  | 1.342868  | 0.041059  |
| H | 0.236336  | 0.653403  | 0.16747   |
| N | -1.650695 | 0.933912  | 0.257625  |
| S | -1.46259  | -3.144807 | -0.296285 |

### 3b<sub>3</sub>

|   |           |           |          |
|---|-----------|-----------|----------|
| C | -2.095418 | -1.717553 | 0.700174 |
| C | -1.181047 | -1.58759  | 1.730224 |
| H | -1.29695  | -0.847852 | 2.513666 |

|   |           |           |            |
|---|-----------|-----------|------------|
| C | -0.100429 | -2.493583 | 1.658137   |
| H | 0.713128  | -2.52193  | 2.372926   |
| C | -0.151092 | -3.32482  | 0.560433   |
| C | 0.845844  | -4.299355 | 0.115367   |
| C | 0.455852  | -5.617885 | -0.171892  |
| H | -0.594109 | -5.885434 | -0.098334  |
| C | 1.405131  | -6.575822 | -0.495368  |
| H | 1.124334  | -7.6024   | -0.704031  |
| C | 2.748439  | -6.184647 | -0.497498  |
| H | 3.532685  | -6.91391  | -0.693526  |
| N | 3.14956   | -4.938034 | -0.271829  |
| C | 2.22897   | -3.969556 | -0.017672  |
| C | 2.838099  | -2.640752 | 0.048491   |
| H | 3.917247  | -2.713468 | 0.141869   |
| C | 2.29175   | -1.396898 | -0.099468  |
| H | 1.22259   | -1.274539 | -0.212591  |
| C | 3.047002  | -0.172159 | -0.097046  |
| C | 2.397513  | 1.06651   | -0.081266  |
| C | 3.044027  | 2.366134  | -0.255413  |
| H | 4.100441  | 2.526923  | -0.414317  |
| C | 2.059656  | 3.298402  | -0.227888  |
| H | 2.157484  | 4.366652  | -0.357303  |
| C | 0.804438  | 2.572348  | -0.020021  |
| C | -0.491908 | 3.179435  | 0.045326   |
| C | -1.653509 | 2.406502  | 0.16282    |
| C | -3.044927 | 2.8043    | 0.227451   |
| H | -3.391726 | 3.82694   | -0.232122  |
| C | -3.810964 | 1.676225  | 0.29394    |
| H | -4.886217 | 1.625331  | 0.379503   |
| C | -2.93214  | 0.524402  | 0.305674   |
| C | -3.211512 | -0.834071 | 0.382917   |
| C | 4.536625  | -0.20548  | -0.105988  |
| C | 5.243148  | -0.847587 | -1.139371  |
| H | 4.692284  | -1.324781 | -1.944029  |
| C | 6.63482   | -0.859243 | -1.155661  |
| H | 7.153456  | -1.350613 | -1.97522   |
| C | 7.379683  | -0.244669 | -0.137485  |
| C | 6.676894  | 0.389791  | 0.893635   |
| H | 7.227152  | 0.872494  | 1.697352   |
| C | 5.28201   | 0.411414  | 0.91124    |
| H | 4.761254  | 0.903716  | 1.72684    |
| C | 8.888889  | -0.287594 | -0.148826  |
| H | 9.258434  | -1.279848 | 0.137462   |
| H | 9.314903  | 0.436965  | 0.55039    |
| H | 9.286711  | -0.073419 | -1.146102  |
| C | -0.62217  | 4.662088  | -0.033072  |
| C | -1.380385 | 5.276257  | -1.043656  |
| H | -1.859435 | 4.659292  | -1.1798144 |
| C | -1.514181 | 6.663326  | -1.102093  |
| H | -2.107773 | 7.107479  | -1.897414  |
| C | -0.890123 | 7.493818  | -0.162674  |
| C | -0.131522 | 6.88228   | 0.845484   |
| H | 0.355275  | 7.499442  | 1.596779   |
| C | -0.000009 | 5.496653  | 0.911839   |
| H | 0.57831   | 5.050214  | 1.715342   |
| C | -1.007252 | 8.997097  | -0.246557  |
| H | -1.011635 | 9.454158  | 0.747663   |
| H | -1.922034 | 9.298878  | -0.764671  |
| H | -0.162832 | 9.430035  | -0.797391  |
| C | -4.547611 | -1.390289 | 0.115929   |
| C | -5.417242 | -0.832856 | -0.842659  |
| H | -5.084272 | 0.009919  | -1.439039  |
| C | -6.679079 | -1.376011 | -1.069068  |
| H | -7.321904 | -0.9288   | -1.822993  |
| C | -7.125834 | -2.502455 | -0.364794  |
| C | -6.252236 | -3.074114 | 0.573187   |
| H | -6.567427 | -3.953412 | 1.12944    |
| C | -4.99281  | -2.534996 | 0.809335   |
| H | -4.343939 | -2.989719 | 1.551477   |

|   |           |           |           |
|---|-----------|-----------|-----------|
| C | -8.502327 | -3.07572  | -0.596289 |
| H | -9.214586 | -2.704383 | 0.151313  |
| H | -8.498797 | -4.167502 | -0.522721 |
| H | -8.890074 | -2.800032 | -1.580959 |
| N | 1.032621  | 1.241784  | 0.056618  |
| H | -0.754561 | 0.541941  | 0.196873  |
| N | -1.647298 | 1.040149  | 0.240982  |
| S | -1.604373 | -3.02583  | -0.370744 |

**3b<sub>4</sub>**

|   |           |           |           |
|---|-----------|-----------|-----------|
| C | -2.066844 | -2.220184 | 0.096797  |
| C | -2.039126 | -3.377489 | 0.865229  |
| H | -2.845338 | -3.64345  | 1.537635  |
| C | -0.849896 | -4.118993 | 0.738361  |
| H | -0.648504 | -5.023035 | 1.301455  |
| C | 0.083363  | -3.568527 | -0.127723 |
| C | 1.348558  | -4.218573 | -0.500048 |
| C | 1.227439  | -5.599408 | -0.779936 |
| H | 0.236154  | -6.039611 | -0.77184  |
| C | 2.325019  | -6.380155 | -1.090763 |
| H | 2.222796  | -7.435421 | -1.319542 |
| C | 3.573757  | -5.750915 | -1.111316 |
| H | 4.474075  | -6.31336  | -1.354081 |
| N | 3.740484  | -4.466265 | -0.838615 |
| C | 2.67413   | -3.665879 | -0.536305 |
| C | 3.146314  | -2.320654 | -0.22246  |
| H | 4.227901  | -2.320807 | -0.135316 |
| C | 2.502545  | -1.126228 | -0.09088  |
| H | 1.434056  | -1.057012 | -0.217027 |
| C | 3.136369  | 0.135404  | 0.177046  |
| C | 2.359643  | 1.2959    | 0.192789  |
| C | 2.85293   | 2.665757  | 0.311784  |
| H | 3.884607  | 2.952656  | 0.455891  |
| C | 1.774972  | 3.479135  | 0.180811  |
| H | 1.753593  | 4.558941  | 0.21395   |
| C | 0.615564  | 2.60332   | -0.015336 |
| C | -0.736546 | 3.042169  | -0.186404 |
| C | -1.798476 | 2.131704  | -0.241596 |
| C | -3.208406 | 2.372776  | -0.445683 |
| H | -3.643221 | 3.342448  | -0.635852 |
| C | -3.860812 | 1.176892  | -0.375336 |
| H | -4.918097 | 1.00515   | -0.508594 |
| C | -2.889529 | 0.13074   | -0.132955 |
| C | -3.120445 | -1.229925 | 0.045079  |
| C | 4.60415   | 0.234184  | 0.415992  |
| C | 5.533548  | -0.129095 | -0.574618 |
| H | 5.177187  | -0.484289 | -1.536695 |
| C | 6.902657  | -0.021018 | -0.34454  |
| H | 7.597893  | -0.302558 | -1.131635 |
| C | 7.400189  | 0.446551  | 0.881017  |
| C | 6.473987  | 0.803339  | 1.86813   |
| H | 6.829799  | 1.162655  | 2.830433  |
| C | 5.100866  | 0.702259  | 1.642006  |
| H | 4.40359   | 0.977296  | 2.427643  |
| C | 8.886598  | 0.574141  | 1.115025  |
| H | 9.420865  | -0.323279 | 0.78625   |
| H | 9.111966  | 0.735222  | 2.172612  |
| H | 9.3046    | 1.419369  | 0.554821  |
| C | -1.031816 | 4.498642  | -0.292731 |
| C | -0.44121  | 5.28621   | -1.296797 |
| H | 0.229168  | 4.81931   | -2.012238 |
| C | -0.719333 | 6.647543  | -1.400029 |
| H | -0.253849 | 7.227279  | -2.193447 |
| C | -1.597727 | 7.280318  | -0.508964 |
| C | -2.190387 | 6.49611   | 0.488852  |
| H | -2.874782 | 6.958545  | 1.195888  |
| C | -1.911391 | 5.134208  | 0.599562  |
| H | -2.37033  | 4.555721  | 1.395763  |

|   |           |           |           |
|---|-----------|-----------|-----------|
| C | -1.873937 | 8.761682  | -0.607741 |
| H | -2.844402 | 9.017518  | -0.17288  |
| H | -1.865364 | 9.10127   | -1.647879 |
| H | -1.113011 | 9.342843  | -0.071881 |
| C | -4.506973 | -1.717551 | 0.259336  |
| C | -5.381666 | -1.086721 | 1.162126  |
| H | -5.03074  | -0.236284 | 1.737602  |
| C | -6.682141 | -1.553524 | 1.347464  |
| H | -7.332464 | -1.047056 | 2.056053  |
| C | -7.160356 | -2.670233 | 0.650837  |
| C | -6.285001 | -3.306899 | -0.242954 |
| H | -6.630436 | -4.171889 | -0.803703 |
| C | -4.985844 | -2.847906 | -0.431504 |
| H | -4.334072 | -3.354712 | -1.136086 |
| C | -8.558442 | -3.193909 | 0.872744  |
| H | -8.552499 | -4.065073 | 1.539523  |
| H | -9.019033 | -3.512935 | -0.067528 |
| H | -9.201861 | -2.436537 | 1.32863   |
| N | 0.989439  | 1.308545  | 0.008705  |
| H | -0.725084 | 0.387685  | 0.060301  |
| N | -1.660228 | 0.771719  | -0.092703 |
| S | -0.584423 | -2.116612 | -0.846633 |

---

**3b<sub>s</sub>**

---

|   |           |           |           |
|---|-----------|-----------|-----------|
| C | -2.723842 | -1.941195 | 0.026375  |
| C | -3.177012 | -3.269601 | 0.057925  |
| H | -4.199599 | -3.527267 | 0.301031  |
| C | -2.192275 | -4.216589 | -0.220442 |
| H | -2.394975 | -5.280122 | -0.206138 |
| C | -0.921631 | -3.674671 | -0.458329 |
| C | 0.311448  | -4.405772 | -0.663979 |
| C | 0.234418  | -5.813596 | -0.834619 |
| H | -0.735115 | -6.284594 | -0.947634 |
| C | 1.368856  | -6.592882 | -0.854108 |
| H | 1.313079  | -7.667611 | -0.989504 |
| C | 2.609074  | -5.952853 | -0.677746 |
| H | 3.52844   | -6.535537 | -0.641898 |
| N | 2.736853  | -4.643101 | -0.572361 |
| C | 1.635201  | -3.841596 | -0.614553 |
| C | 1.911622  | -2.41706  | -0.587329 |
| H | 1.196812  | -1.747357 | -1.042835 |
| C | 3.077834  | -1.910802 | -0.072384 |
| H | 3.779285  | -2.655941 | 0.290833  |
| C | 3.534562  | -0.56354  | 0.035625  |
| C | 2.795923  | 0.624509  | -0.118213 |
| C | 3.374762  | 1.932657  | -0.283296 |
| H | 4.434569  | 2.119163  | -0.356276 |
| C | 2.372598  | 2.853462  | -0.369981 |
| H | 2.476586  | 3.918695  | -0.504666 |
| C | 1.114586  | 2.169431  | -0.252763 |
| C | -0.147873 | 2.776394  | -0.208153 |
| C | -1.388666 | 2.102495  | -0.033824 |
| C | -2.690112 | 2.767582  | -0.023658 |
| H | -2.860031 | 3.828167  | -0.137404 |
| C | -3.618995 | 1.789671  | 0.131872  |
| H | -4.693641 | 1.897017  | 0.156373  |
| C | -2.884996 | 0.531444  | 0.19676   |
| C | -3.46991  | -0.746483 | 0.214036  |
| C | 4.982005  | -0.425934 | 0.378624  |
| C | 5.951476  | -1.17935  | -0.308247 |
| H | 5.642162  | -1.827394 | -1.123024 |
| C | 7.300104  | -1.095656 | 0.027683  |
| H | 8.024491  | -1.685511 | -0.528536 |
| C | 7.74063   | -0.263054 | 1.06663   |
| C | 6.775223  | 0.476132  | 1.762479  |
| H | 7.082476  | 1.113351  | 2.587972  |
| C | 5.424229  | 0.397474  | 1.429043  |
| H | 4.698143  | 0.961621  | 2.005911  |

|   |           |           |           |
|---|-----------|-----------|-----------|
| C | 9.206806  | -0.154902 | 1.40967   |
| H | 9.719009  | -1.113876 | 1.285573  |
| H | 9.352572  | 0.179177  | 2.440805  |
| H | 9.712693  | 0.568014  | 0.75743   |
| C | -0.18264  | 4.268661  | -0.352472 |
| C | 0.112574  | 4.883687  | -1.578324 |
| H | 0.36673   | 4.266985  | -2.43557  |
| C | 0.070067  | 6.271458  | -1.712351 |
| H | 0.296127  | 6.720738  | -2.676218 |
| C | -0.267514 | 7.094964  | -0.630292 |
| C | -0.567577 | 6.47829   | 0.592115  |
| H | -0.836088 | 7.091682  | 1.448704  |
| C | -0.525269 | 5.09155   | 0.731294  |
| H | -0.758964 | 4.638886  | 1.690501  |
| C | -0.284176 | 8.598745  | -0.768924 |
| H | -1.032338 | 9.052676  | -0.112366 |
| H | -0.501808 | 8.903222  | -1.796719 |
| H | 0.687746  | 9.031281  | -0.500378 |
| C | -4.945221 | -0.865742 | 0.397329  |
| C | -5.568488 | -0.340734 | 1.541238  |
| H | -4.963396 | 0.143477  | 2.301461  |
| C | -6.947736 | -0.444155 | 1.71611   |
| H | -7.402358 | -0.032151 | 2.613466  |
| C | -7.756491 | -1.071276 | 0.759364  |
| C | -7.133643 | -1.588761 | -0.385468 |
| H | -7.737466 | -2.066592 | -1.152918 |
| C | -5.755411 | -1.493996 | -0.563874 |
| H | -5.302094 | -1.890246 | -1.467208 |
| C | -9.246173 | -1.208018 | 0.963091  |
| H | -9.494225 | -2.171282 | 1.426097  |
| H | -9.78559  | -1.158592 | 0.012505  |
| H | -9.634316 | -0.422756 | 1.617858  |
| N | 1.418225  | 0.819231  | -0.14035  |
| H | 0.696393  | 0.140493  | 0.075458  |
| N | -1.534006 | 0.763338  | 0.108769  |
| S | -1.004556 | -1.929152 | -0.334293 |

---

**3b<sub>e</sub>**

---

|   |           |           |           |
|---|-----------|-----------|-----------|
| C | -2.807089 | -1.909426 | 0.011143  |
| C | -3.261566 | -3.197064 | 0.333006  |
| H | -4.292398 | -3.399657 | 0.593265  |
| C | -2.26334  | -4.174281 | 0.325     |
| H | -2.456704 | -5.205065 | 0.595796  |
| C | -0.992532 | -3.692888 | -0.010135 |
| C | 0.236441  | -4.456981 | -0.114481 |
| C | 0.126406  | -5.864911 | -0.24711  |
| H | -0.857046 | -6.320975 | -0.254824 |
| C | 1.242103  | -6.655149 | -0.412985 |
| H | 1.161061  | -7.730661 | -0.526775 |
| C | 2.496005  | -6.018384 | -0.462892 |
| H | 3.401159  | -6.603264 | -0.621042 |
| N | 2.653532  | -4.715806 | -0.325882 |
| C | 1.569761  | -3.911816 | -0.127234 |
| C | 1.862875  | -2.509789 | 0.077295  |
| H | 1.058543  | -1.880136 | 0.420141  |
| C | 3.112822  | -1.968194 | -0.062935 |
| H | 3.902804  | -2.676744 | -0.294895 |
| C | 3.552211  | -0.619034 | 0.094316  |
| C | 2.805839  | 0.569921  | 0.1252    |
| C | 3.3943    | 1.888047  | 0.168424  |
| H | 4.454624  | 2.07291   | 0.230724  |
| C | 2.40669   | 2.821707  | 0.100956  |
| H | 2.522828  | 3.894091  | 0.108981  |
| C | 1.141862  | 2.143358  | 0.000661  |
| C | -0.107809 | 2.765022  | -0.105472 |
| C | -1.373171 | 2.107936  | -0.14882  |
| C | -2.65212  | 2.802226  | -0.296622 |
| H | -2.785148 | 3.867062  | -0.419283 |

|   |           |           |           |
|---|-----------|-----------|-----------|
| C | -3.61417  | 1.845195  | -0.257326 |
| H | -4.681655 | 1.978325  | -0.355879 |
| C | -2.922514 | 0.571585  | -0.095083 |
| C | -3.540031 | -0.686486 | -0.010023 |
| C | 5.045783  | -0.481744 | 0.181314  |
| C | 5.867578  | -0.905335 | -0.875212 |
| H | 5.413473  | -1.295634 | -1.781706 |
| C | 7.255645  | -0.823072 | -0.782056 |
| H | 7.865533  | -1.154119 | -1.619078 |
| C | 7.87885   | -0.319327 | 0.368081  |
| C | 7.058621  | 0.092112  | 1.426334  |
| H | 7.512505  | 0.471454  | 2.338574  |
| C | 5.668844  | 0.011569  | 1.338172  |
| H | 5.05831   | 0.320342  | 2.181676  |
| C | 9.38235   | -0.205449 | 0.453678  |
| H | 9.876617  | -1.007455 | -0.10272  |
| H | 9.727711  | -0.246528 | 1.490705  |
| H | 9.732212  | 0.744804  | 0.031089  |
| C | -0.109454 | 4.263911  | -0.16485  |
| C | 0.37825   | 4.945825  | -1.289917 |
| H | 0.760786  | 4.376896  | -2.132351 |
| C | 0.36454   | 6.339486  | -1.345477 |
| H | 0.74151   | 6.841096  | -2.233335 |
| C | -0.134006 | 7.103154  | -0.281813 |
| C | -0.625351 | 6.420411  | 0.839389  |
| H | -1.021222 | 6.986564  | 1.678934  |
| C | -0.613579 | 5.02747   | 0.899279  |
| H | -0.997772 | 4.522844  | 1.780958  |
| C | -0.120193 | 8.612576  | -0.331261 |
| H | -0.950486 | 9.039287  | 0.239128  |
| H | -0.187816 | 8.979254  | -1.359593 |
| H | 0.807135  | 9.013523  | 0.096679  |
| C | -5.023196 | -0.77327  | 0.096057  |
| C | -5.721868 | -0.081222 | 1.10056   |
| H | -5.167746 | 0.5133    | 1.819863  |
| C | -7.109601 | -0.162003 | 1.19254   |
| H | -7.622637 | 0.38129   | 1.982137  |
| C | -7.854408 | -0.934327 | 0.290399  |
| C | -7.157105 | -1.623758 | -0.711123 |
| H | -7.709382 | -2.220526 | -1.43251  |
| C | -5.768921 | -1.551713 | -0.805722 |
| H | -5.255876 | -2.085238 | -1.599847 |
| C | -9.355564 | -1.03977  | 0.410922  |
| H | -9.639548 | -1.809532 | 1.139296  |
| H | -9.815033 | -1.309333 | -0.544139 |
| H | -9.796894 | -0.097476 | 0.749197  |
| N | 1.43128   | 0.785216  | 0.030189  |
| H | 0.689204  | 0.099273  | -0.026278 |
| N | -1.561139 | 0.773979  | -0.051188 |
| S | -1.089719 | -1.972525 | -0.319362 |

---

**3b<sub>g</sub>**

---

|   |           |           |           |
|---|-----------|-----------|-----------|
| C | -2.819282 | -1.943852 | -0.037636 |
| C | -3.16226  | -3.205099 | 0.458869  |
| H | -4.090449 | -3.389273 | 0.984832  |
| C | -2.160043 | -4.172158 | 0.291823  |
| H | -2.239688 | -5.17675  | 0.690231  |
| C | -1.006985 | -3.704023 | -0.338076 |
| C | 0.233239  | -4.424285 | -0.558701 |
| C | 0.147545  | -5.829621 | -0.712256 |
| H | -0.831519 | -6.296896 | -0.727612 |
| C | 1.280407  | -6.59714  | -0.876755 |
| H | 1.222216  | -7.67176  | -1.011151 |
| C | 2.521383  | -5.93555  | -0.888616 |
| H | 3.441548  | -6.501303 | -1.028649 |
| N | 2.650611  | -4.629959 | -0.744079 |
| C | 1.550107  | -3.842068 | -0.574408 |
| C | 1.819361  | -2.430867 | -0.36935  |

|   |           |           |           |
|---|-----------|-----------|-----------|
| H | 1.004068  | -1.72797  | -0.322825 |
| C | 3.081994  | -1.94402  | -0.166923 |
| H | 3.876162  | -2.684094 | -0.166457 |
| C | 3.512184  | -0.602259 | 0.081991  |
| C | 2.765356  | 0.594785  | 0.053159  |
| C | 3.425783  | 1.902671  | 0.079045  |
| H | 4.490113  | 2.06931   | 0.14094   |
| C | 2.455022  | 2.835991  | -0.037385 |
| H | 2.568706  | 3.909256  | -0.062409 |
| C | 1.191969  | 2.107041  | -0.126547 |
| C | -0.059756 | 2.785768  | -0.222013 |
| C | -1.318686 | 2.173883  | -0.194641 |
| C | -2.612825 | 2.794184  | -0.311005 |
| H | -2.773731 | 3.849545  | -0.468351 |
| C | -3.565951 | 1.820913  | -0.208957 |
| H | -4.635206 | 1.948237  | -0.282365 |
| C | -2.913677 | 0.547182  | -0.043027 |
| C | -3.530266 | -0.706057 | 0.061933  |
| C | 4.973188  | -0.503145 | 0.396943  |
| C | 5.93795   | -1.059468 | -0.461464 |
| H | 5.620802  | -1.523072 | -1.391181 |
| C | 7.294734  | -1.000008 | -0.153524 |
| H | 8.017148  | -1.422897 | -0.847438 |
| C | 7.746262  | -0.400351 | 1.031206  |
| C | 6.785749  | 0.144599  | 1.892312  |
| H | 7.10402   | 0.610344  | 2.821743  |
| C | 5.4265    | 0.094572  | 1.584765  |
| H | 4.703272  | 0.512356  | 2.278206  |
| C | 9.215592  | -0.370968 | 1.377984  |
| H | 9.532585  | -1.314624 | 1.83944   |
| H | 9.443202  | 0.43069   | 2.086287  |
| H | 9.834064  | -0.225213 | 0.486958  |
| C | -0.049048 | 4.279156  | -0.345014 |
| C | 0.454482  | 4.90546   | -1.496381 |
| H | 0.840347  | 4.295226  | -2.307695 |
| C | 0.453843  | 6.294341  | -1.616016 |
| H | 0.84307   | 6.751075  | -2.522681 |
| C | -0.047524 | 7.111519  | -0.593267 |
| C | -0.554113 | 6.485876  | 0.553248  |
| H | -0.951128 | 7.093366  | 1.362849  |
| C | -0.554054 | 5.096531  | 0.677811  |
| H | -0.945319 | 4.637468  | 1.581096  |
| C | -0.018311 | 8.616689  | -0.713227 |
| H | -0.82598  | 9.079773  | -0.138904 |
| H | -0.112773 | 8.936613  | -1.755134 |
| H | 0.926353  | 9.025314  | -0.333107 |
| C | -4.992157 | -0.771584 | 0.324988  |
| C | -5.585854 | -0.025688 | 1.358044  |
| H | -4.962384 | 0.600431  | 1.988343  |
| C | -6.957561 | -0.0951   | 1.595127  |
| H | -7.387764 | 0.490628  | 2.403415  |
| C | -7.789015 | -0.913052 | 0.819265  |
| C | -7.195783 | -1.661248 | -0.208848 |
| H | -7.817722 | -2.296424 | -0.834588 |
| C | -5.826736 | -1.598365 | -0.450054 |
| H | -5.39602  | -2.178611 | -1.26004  |
| C | -9.269861 | -1.009704 | 1.095187  |
| H | -9.500755 | -1.893328 | 1.703089  |
| H | -9.843901 | -1.098312 | 0.167777  |
| H | -9.633059 | -0.13413  | 1.64023   |
| N | 1.398063  | 0.760781  | -0.075879 |
| H | -0.772627 | 0.186946  | 0.087465  |
| N | -1.550094 | 0.825855  | -0.050297 |
| S | -1.245945 | -2.041345 | -0.805512 |

---

**4a<sub>1</sub>**

---

|   |           |          |          |
|---|-----------|----------|----------|
| C | 0.423675  | 2.814343 | 0.304138 |
| C | -0.447521 | 3.785088 | 0.796945 |



|   |           |           |           |
|---|-----------|-----------|-----------|
| H | -0.096826 | 4.691342  | 1.273522  |
| C | -1.806505 | 3.465061  | 0.644437  |
| H | -2.609301 | 4.098723  | 1.001711  |
| C | -2.04435  | 2.239446  | 0.032042  |
| C | -3.389261 | 1.748808  | -0.315952 |
| C | -4.264408 | 2.745272  | -0.756119 |
| H | -3.863208 | 3.734412  | -0.950359 |
| C | -5.643107 | 2.544725  | -0.967957 |
| C | -6.189196 | 1.252539  | -0.690686 |
| C | -5.308097 | 0.240439  | -0.266021 |
| H | -5.723992 | -0.745711 | -0.075744 |
| C | -3.928004 | 0.409536  | -0.120933 |
| C | -3.230271 | -0.824776 | 0.251205  |
| H | -3.836706 | -1.488147 | 0.863697  |
| C | -2.027954 | -1.310279 | -0.156395 |
| H | -1.414959 | -0.716371 | -0.821756 |
| C | -1.493422 | -2.613292 | 0.170582  |
| C | -0.135217 | -2.858416 | 0.003011  |
| C | 0.565281  | -4.122909 | -0.029674 |
| H | 0.086247  | -5.085011 | 0.075281  |
| C | 1.887593  | -3.883046 | -0.263581 |
| H | 2.675742  | -4.614268 | -0.361184 |
| C | 2.08155   | -2.452718 | -0.354777 |
| C | 3.274634  | -1.731353 | -0.465038 |
| C | 3.309236  | -0.304071 | -0.347134 |
| C | 4.507836  | 0.526128  | -0.462745 |
| H | 5.501022  | 0.174253  | -0.701369 |
| C | 4.116337  | 1.804381  | -0.22581  |
| H | 4.72685   | 2.695366  | -0.246939 |
| C | 2.676843  | 1.762116  | 0.014098  |
| C | 1.861455  | 2.864021  | 0.274109  |
| C | -2.372555 | -3.704326 | 0.660668  |
| C | -3.567678 | -4.031793 | -0.009916 |
| H | -3.847954 | -3.474303 | -0.898243 |
| C | -4.379303 | -5.069574 | 0.435264  |
| H | -5.289577 | -5.304837 | -0.111077 |
| C | -4.041719 | -5.82359  | 1.570741  |
| C | -2.859956 | -5.49333  | 2.243915  |
| H | -2.578748 | -6.049612 | 3.134453  |
| C | -2.040325 | -4.454815 | 1.80117   |
| H | -1.140266 | -4.207751 | 2.355525  |
| C | -4.923525 | -6.956648 | 2.037208  |
| H | -5.970447 | -6.643623 | 2.111171  |
| H | -4.610776 | -7.329553 | 3.016085  |
| H | -4.890849 | -7.798332 | 1.33492   |
| C | 4.544359  | -2.488059 | -0.660205 |
| C | 4.718835  | -3.333169 | -1.768973 |
| H | 3.922621  | -3.415675 | -2.503008 |
| C | 5.902768  | -4.046948 | -1.952221 |
| H | 6.009725  | -4.686218 | -2.825175 |
| C | 6.961092  | -3.944437 | -1.040191 |
| C | 6.790796  | -3.097186 | 0.063715  |
| H | 7.594318  | -2.997691 | 0.789512  |
| C | 5.607282  | -2.386648 | 0.25426   |
| H | 5.498328  | -1.749926 | 1.127061  |
| C | 8.232946  | -4.737433 | -1.225308 |
| H | 9.104561  | -4.187696 | -0.857389 |
| H | 8.402561  | -4.980825 | -2.278124 |
| H | 8.192626  | -5.685437 | -0.674209 |
| C | 2.493998  | 4.186166  | 0.543525  |
| C | 3.460035  | 4.332153  | 1.553272  |
| H | 3.730063  | 3.472112  | 2.157727  |
| C | 4.062392  | 5.565772  | 1.796466  |
| H | 4.803361  | 5.648766  | 2.587517  |
| C | 3.726408  | 6.699017  | 1.045055  |
| C | 2.761972  | 6.552867  | 0.036751  |
| H | 2.490106  | 7.412195  | -0.571156 |
| C | 2.151163  | 5.325711  | -0.206355 |
| H | 1.415697  | 5.239388  | -1.000099 |

|   |           |           |           |
|---|-----------|-----------|-----------|
| C | 4.359189  | 8.040371  | 1.326822  |
| H | 3.73075   | 8.640368  | 1.99683   |
| H | 4.494599  | 8.619133  | 0.408127  |
| H | 5.334834  | 7.929235  | 1.808149  |
| N | 0.832475  | -1.887406 | -0.223667 |
| H | 0.763442  | -0.879497 | -0.078168 |
| N | 2.226604  | 0.460644  | -0.087117 |
| S | -0.514631 | 1.474854  | -0.335901 |
| C | -7.584863 | 1.036176  | -0.873437 |
| C | -8.395651 | 2.05513   | -1.314749 |
| H | -9.459071 | 1.884048  | -1.45242  |
| C | -7.851818 | 3.337679  | -1.596564 |
| H | -8.506639 | 4.130311  | -1.945866 |
| C | -6.508167 | 3.577478  | -1.428292 |
| H | -6.090023 | 4.557871  | -1.640207 |
| H | -7.996374 | 0.053015  | -0.661641 |

---



---

**4a<sub>2</sub>**

---



---

|   |           |           |           |
|---|-----------|-----------|-----------|
| C | -0.025067 | 2.488289  | 0.793811  |
| C | -0.250141 | 1.579079  | 1.809443  |
| H | 0.509043  | 1.341765  | 2.544138  |
| C | -1.534945 | 0.99226   | 1.779994  |
| H | -1.877099 | 0.249369  | 2.490462  |
| C | -2.310744 | 1.417078  | 0.723191  |
| C | -3.640678 | 0.941433  | 0.319649  |
| C | -4.653408 | 1.865197  | 0.117437  |
| H | -4.429512 | 2.922272  | 0.23343   |
| C | -5.98544  | 1.487261  | -0.17505  |
| C | -6.294105 | 0.090273  | -0.24138  |
| C | -5.249777 | -0.841395 | -0.059798 |
| H | -5.487534 | -1.898715 | -0.147234 |
| C | -3.923233 | -0.472876 | 0.171078  |
| C | -2.956583 | -1.570106 | 0.193957  |
| H | -3.429796 | -2.538756 | 0.333749  |
| C | -1.606882 | -1.586479 | -0.021804 |
| H | -1.084793 | -0.651214 | -0.186533 |
| C | -0.801605 | -2.7813   | -0.042869 |
| C | 0.590009  | -2.72624  | -0.063296 |
| C | 1.516083  | -3.823286 | -0.256928 |
| H | 1.215776  | -4.849229 | -0.40778  |
| C | 2.7871    | -3.3308   | -0.260234 |
| H | 3.701125  | -3.885115 | -0.411571 |
| C | 2.720394  | -1.900839 | -0.051969 |
| C | 3.761474  | -0.965976 | -0.000456 |
| C | 3.490364  | 0.435053  | 0.145113  |
| C | 4.471906  | 1.523486  | 0.197561  |
| H | 5.546856  | 1.411312  | 0.178589  |
| C | 3.763137  | 2.679875  | 0.283872  |
| H | 4.151464  | 3.68468   | 0.373247  |
| C | 2.352009  | 2.301172  | 0.323573  |
| C | 1.23521   | 3.124899  | 0.433     |
| C | -1.448172 | -4.125979 | -0.039234 |
| C | -2.335661 | -4.504455 | -1.06329  |
| H | -2.550005 | -3.804997 | -1.865765 |
| C | -2.929704 | -5.763194 | -1.068377 |
| H | -3.604724 | -6.030358 | -1.877868 |
| C | -2.669337 | -6.694919 | -0.051523 |
| C | -1.793221 | -6.31569  | 0.972045  |
| H | -1.580879 | -7.012268 | 1.779196  |
| C | -1.192632 | -5.055843 | 0.98035   |
| H | -0.526093 | -4.782767 | 1.792954  |
| C | -3.303592 | -8.065001 | -0.075779 |
| H | -4.368072 | -8.008379 | -0.325584 |
| H | -3.207546 | -8.567234 | 0.890644  |
| H | -2.831041 | -8.70645  | -0.829696 |
| C | 5.168156  | -1.442127 | -0.115662 |
| C | 6.016233  | -0.970643 | -1.132645 |
| H | 5.632824  | -0.257536 | -1.856372 |

|   |           |           |           |
|---|-----------|-----------|-----------|
| C | 7.334046  | -1.413227 | -1.235071 |
| H | 7.963229  | -1.02934  | -2.034506 |
| C | 7.859588  | -2.349308 | -0.334153 |
| C | 7.016154  | -2.819637 | 0.681117  |
| H | 7.398253  | -3.535803 | 1.404681  |
| C | 5.699361  | -2.37517  | 0.791571  |
| H | 5.076788  | -2.739968 | 1.603202  |
| C | 9.277533  | -2.851771 | -0.467151 |
| H | 9.704341  | -3.107274 | 0.50733   |
| H | 9.924158  | -2.105272 | -0.937562 |
| H | 9.321292  | -3.756201 | -1.086993 |
| C | 1.272188  | 4.570663  | 0.160509  |
| C | 2.098193  | 5.121397  | -0.840448 |
| H | 2.698455  | 4.460893  | -1.456679 |
| C | 2.118757  | 6.492416  | -1.078324 |
| H | 2.756264  | 6.885673  | -1.866609 |
| C | 1.315773  | 7.372843  | -0.339207 |
| C | 0.477622  | 6.825107  | 0.643804  |
| H | -0.16108  | 7.483119  | 1.227518  |
| C | 0.450203  | 5.456374  | 0.887313  |
| H | -0.198746 | 5.060222  | 1.66205   |
| C | 1.361347  | 8.861224  | -0.583119 |
| H | 2.112201  | 9.341632  | 0.05693   |
| H | 0.399203  | 9.33282   | -0.363014 |
| H | 1.626141  | 9.088583  | -1.61975  |
| N | 1.380992  | -1.592339 | 0.054725  |
| H | 1.122851  | -0.610445 | 0.190627  |
| N | 2.244115  | 0.923782  | 0.248628  |
| S | -1.463079 | 2.631598  | -0.20896  |
| C | -7.635928 | -0.30635  | -0.503301 |
| C | -8.620977 | 0.636103  | -0.6899   |
| H | -9.641598 | 0.32394   | -0.890003 |
| C | -8.313695 | 2.019916  | -0.62239  |
| H | -9.102167 | 2.751342  | -0.77183  |
| C | -7.025646 | 2.435573  | -0.369044 |
| H | -6.787702 | 3.494457  | -0.314387 |
| H | -7.868355 | -1.366607 | -0.555541 |

---

**4a<sub>3</sub>**

---

|   |           |           |           |
|---|-----------|-----------|-----------|
| C | -0.014233 | 2.515286  | 0.765352  |
| C | -0.262013 | 1.646613  | 1.809949  |
| H | 0.472916  | 1.447269  | 2.581265  |
| C | -1.543486 | 1.046925  | 1.76884   |
| H | -1.899022 | 0.331548  | 2.500627  |
| C | -2.295177 | 1.42965   | 0.681733  |
| C | -3.623974 | 0.949413  | 0.276225  |
| C | -4.631296 | 1.871705  | 0.046372  |
| H | -4.404638 | 2.930308  | 0.140544  |
| C | -5.962488 | 1.491753  | -0.24999  |
| C | -6.276216 | 0.095174  | -0.289402 |
| C | -5.236582 | -0.835918 | -0.078143 |
| H | -5.4769   | -1.894119 | -0.144785 |
| C | -3.911638 | -0.465691 | 0.156684  |
| C | -2.948535 | -1.565765 | 0.203183  |
| H | -3.428533 | -2.53064  | 0.346101  |
| C | -1.597426 | -1.587419 | 0.00411   |
| H | -1.047063 | -0.668762 | -0.1492   |
| C | -0.800644 | -2.788969 | -0.004367 |
| C | 0.593735  | -2.725293 | -0.037136 |
| C | 1.493037  | -3.859697 | -0.234623 |
| H | 1.188947  | -4.886811 | -0.375384 |
| C | 2.753729  | -3.359302 | -0.256315 |
| H | 3.67576   | -3.899775 | -0.415069 |
| C | 2.631564  | -1.913835 | -0.053715 |
| C | 3.731816  | -0.991459 | -0.029575 |
| C | 3.522878  | 0.385112  | 0.095802  |
| C | 4.472269  | 1.480707  | 0.135995  |
| H | 5.545356  | 1.36367   | 0.103873  |

|   |           |           |           |
|---|-----------|-----------|-----------|
| C | 3.776031  | 2.649354  | 0.235836  |
| H | 4.186566  | 3.644849  | 0.316668  |
| C | 2.360016  | 2.338586  | 0.292145  |
| C | 1.251965  | 3.162094  | 0.42025   |
| C | -1.458188 | -4.126533 | 0.019035  |
| C | -2.36278  | -4.510092 | -0.988013 |
| H | -2.581492 | -3.81995  | -1.797258 |
| C | -2.958173 | -5.768432 | -0.974931 |
| H | -3.639995 | -6.043612 | -1.775905 |
| C | -2.688686 | -6.690165 | 0.048147  |
| C | -1.7924   | -6.30679  | 1.053073  |
| H | -1.564854 | -6.99991  | 1.859003  |
| C | -1.186504 | -5.050208 | 1.040792  |
| H | -0.499437 | -4.775148 | 1.835061  |
| C | -3.362177 | -8.041405 | 0.07156   |
| H | -4.393475 | -7.96334  | 0.4374    |
| H | -2.834095 | -8.740007 | 0.726264  |
| H | -3.409481 | -8.481332 | -0.929647 |
| C | 5.127314  | -1.498347 | -0.159129 |
| C | 5.966629  | -1.068498 | -1.200388 |
| H | 5.581795  | -0.371754 | -1.939275 |
| C | 7.277541  | -1.532594 | -1.308972 |
| H | 7.900578  | -1.179731 | -2.127268 |
| C | 7.801413  | -2.451506 | -0.391087 |
| C | 6.964636  | -2.882853 | 0.648062  |
| H | 7.346188  | -3.586264 | 1.384354  |
| C | 5.656782  | -2.416703 | 0.764698  |
| H | 5.039145  | -2.754118 | 1.591778  |
| C | 9.209428  | -2.980188 | -0.52797  |
| H | 9.666542  | -3.15816  | 0.450238  |
| H | 9.846447  | -2.283442 | -1.080285 |
| H | 9.223853  | -3.934499 | -1.069307 |
| C | 1.302059  | 4.614755  | 0.191159  |
| C | 2.148314  | 5.197052  | -0.773443 |
| H | 2.75843   | 4.558359  | -1.403263 |
| C | 2.179123  | 6.576378  | -0.963089 |
| H | 2.836353  | 6.993322  | -1.721967 |
| C | 1.361561  | 7.434384  | -0.215466 |
| C | 0.499012  | 6.855024  | 0.728438  |
| H | -0.153666 | 7.494077  | 1.318133  |
| C | 0.465869  | 5.479864  | 0.927927  |
| H | -0.201884 | 5.060263  | 1.673973  |
| C | 1.409814  | 8.930272  | -0.408774 |
| H | 1.994298  | 9.412333  | 0.384886  |
| H | 0.407924  | 9.370279  | -0.381025 |
| H | 1.872517  | 9.195345  | -1.363356 |
| N | 1.334258  | -1.558952 | 0.065408  |
| H | 1.454528  | 0.358075  | 0.207135  |
| N | 2.284154  | 0.956076  | 0.217703  |
| S | -1.424556 | 2.602259  | -0.283732 |
| C | -7.616704 | -0.302826 | -0.554591 |
| C | -8.596665 | 0.638887  | -0.770163 |
| H | -9.616628 | 0.32627   | -0.972631 |
| C | -8.284439 | 2.022424  | -0.729774 |
| H | -9.068696 | 2.753331  | -0.90213  |
| C | -6.997109 | 2.439247  | -0.473882 |
| H | -6.755933 | 3.498211  | -0.440042 |
| H | -7.852341 | -1.363158 | -0.586141 |

---

**4a<sub>4</sub>**

---

|   |           |          |           |
|---|-----------|----------|-----------|
| C | 0.327253  | 2.761902 | 0.359285  |
| C | -0.495763 | 3.32359  | 1.317818  |
| H | -0.116993 | 3.980899 | 2.091421  |
| C | -1.847881 | 2.916952 | 1.221935  |
| H | -2.62259  | 3.238287 | 1.908713  |
| C | -2.104474 | 2.037333 | 0.19066   |
| C | -3.452874 | 1.571815 | -0.206884 |
| C | -4.346509 | 2.594202 | -0.499896 |

|   |           |           |           |
|---|-----------|-----------|-----------|
| H | -3.977668 | 3.615387  | -0.497825 |
| C | -5.708435 | 2.378767  | -0.814322 |
| C | -6.193488 | 1.034507  | -0.812549 |
| C | -5.28947  | 0.000642  | -0.496682 |
| H | -5.67158  | -1.016815 | -0.483875 |
| C | -3.935321 | 0.200247  | -0.208123 |
| C | -3.210803 | -1.030068 | 0.10743   |
| H | -3.883561 | -1.857066 | 0.318868  |
| C | -1.881044 | -1.321987 | 0.1077    |
| H | -1.14946  | -0.563821 | -0.125576 |
| C | -1.319587 | -2.625536 | 0.361044  |
| C | 0.058545  | -2.807943 | 0.277333  |
| C | 0.770529  | -4.081134 | 0.342182  |
| H | 0.31887   | -5.046715 | 0.519427  |
| C | 2.078969  | -3.806581 | 0.108955  |
| H | 2.904672  | -4.502901 | 0.076278  |
| C | 2.170569  | -2.356556 | -0.089247 |
| C | 3.381831  | -1.625178 | -0.336925 |
| C | 3.394596  | -0.228253 | -0.343891 |
| C | 4.48957   | 0.685343  | -0.597826 |
| H | 5.486275  | 0.382162  | -0.881228 |
| C | 4.031836  | 1.958257  | -0.437683 |
| H | 4.590164  | 2.871336  | -0.578774 |
| C | 2.62532   | 1.906674  | -0.085057 |
| C | 1.76397   | 2.953201  | 0.205269  |
| C | -2.190766 | -3.792211 | 0.680754  |
| C | -3.139223 | -4.271982 | -0.239488 |
| H | -3.235879 | -3.788897 | -1.207208 |
| C | -3.933725 | -5.375862 | 0.061849  |
| H | -4.647696 | -5.734827 | -0.675433 |
| C | -3.822997 | -6.037772 | 1.293334  |
| C | -2.878    | -5.559089 | 2.209242  |
| H | -2.766802 | -6.05404  | 3.170718  |
| C | -2.075207 | -4.458078 | 1.910947  |
| H | -1.352185 | -4.104518 | 2.639763  |
| C | -4.709578 | -7.21429  | 1.625248  |
| H | -5.693894 | -6.88106  | 1.977013  |
| H | -4.273349 | -7.833367 | 2.414046  |
| H | -4.878488 | -7.847058 | 0.748489  |
| C | 4.654462  | -2.36308  | -0.567838 |
| C | 4.763714  | -3.313137 | -1.599227 |
| H | 3.908553  | -3.499067 | -2.24224  |
| C | 5.954774  | -4.000458 | -1.822677 |
| H | 6.008725  | -4.721753 | -2.634587 |
| C | 7.088407  | -3.768848 | -1.030613 |
| C | 6.983007  | -2.820734 | -0.005105 |
| H | 7.843731  | -2.621091 | 0.628589  |
| C | 5.790648  | -2.13556  | 0.227189  |
| H | 5.733161  | -1.422174 | 1.043928  |
| C | 8.369114  | -4.535401 | -1.260463 |
| H | 9.238126  | -3.981784 | -0.893445 |
| H | 8.523183  | -4.746965 | -2.322996 |
| H | 8.352862  | -5.500256 | -0.738197 |
| C | 2.28817   | 4.319217  | 0.44016   |
| C | 3.437734  | 4.551755  | 1.218157  |
| H | 3.942328  | 3.713344  | 1.686975  |
| C | 3.919529  | 5.843656  | 1.421843  |
| H | 4.807466  | 5.988918  | 2.032033  |
| C | 3.272519  | 6.957248  | 0.87169   |
| C | 2.117537  | 6.728648  | 0.107335  |
| H | 1.596025  | 7.572672  | -0.337401 |
| C | 1.630229  | 5.442861  | -0.099046 |
| H | 0.738713  | 5.296816  | -0.700678 |
| C | 3.776394  | 8.358473  | 1.118308  |
| H | 3.225306  | 8.838768  | 1.936571  |
| H | 3.650609  | 8.989287  | 0.23289   |
| H | 4.835081  | 8.360495  | 1.392076  |
| N | 0.958829  | -1.78423  | 0.026234  |
| H | 1.402586  | 0.105492  | 0.116364  |

|   |           |           |           |
|---|-----------|-----------|-----------|
| N | 2.298071  | 0.557556  | -0.079043 |
| S | -0.633267 | 1.752867  | -0.718799 |
| C | -7.561782 | 0.793238  | -1.122781 |
| C | -8.403806 | 1.83956   | -1.421333 |
| H | -9.446271 | 1.648537  | -1.657703 |
| C | -7.920132 | 3.174164  | -1.423801 |
| H | -8.598176 | 3.98825   | -1.661514 |
| C | -6.601788 | 3.438324  | -1.126989 |
| H | -6.228454 | 4.458823  | -1.12784  |
| H | -7.92885  | -0.229494 | -1.120525 |

---



---

4a<sub>5</sub>

---



---

|   |           |           |           |
|---|-----------|-----------|-----------|
| C | -1.327892 | -2.823044 | 0.284706  |
| C | -0.784958 | -4.061873 | 0.632862  |
| H | -1.371338 | -4.841243 | 1.102405  |
| C | 0.585473  | -4.182639 | 0.360923  |
| H | 1.15889   | -5.065616 | 0.615818  |
| C | 1.153603  | -3.044546 | -0.205974 |
| C | 2.558105  | -2.845655 | -0.554156 |
| C | 3.347243  | -3.980153 | -0.742926 |
| H | 2.875662  | -4.957565 | -0.739653 |
| C | 4.740463  | -3.923358 | -0.946465 |
| C | 5.377174  | -2.640925 | -0.962521 |
| C | 4.572521  | -1.49163  | -0.804184 |
| H | 5.050576  | -0.519495 | -0.875666 |
| C | 3.194262  | -1.542063 | -0.624108 |
| C | 2.467918  | -0.263382 | -0.525142 |
| H | 1.604536  | -0.114173 | -1.164392 |
| C | 2.918709  | 0.764366  | 0.245294  |
| H | 3.814605  | 0.566111  | 0.830633  |
| C | 2.433942  | 2.120258  | 0.364027  |
| C | 1.156214  | 2.590692  | 0.059652  |
| C | 0.798766  | 3.977326  | -0.136037 |
| H | 1.505339  | 4.792241  | -0.105503 |
| C | -0.531985 | 4.056173  | -0.410671 |
| H | -1.104159 | 4.94734   | -0.617425 |
| C | -1.086461 | 2.725563  | -0.369856 |
| C | -2.438994 | 2.387718  | -0.4666   |
| C | -2.956095 | 1.072241  | -0.259925 |
| C | -4.371658 | 0.713632  | -0.33764  |
| H | -5.181945 | 1.38206   | -0.589921 |
| C | -4.448578 | -0.609988 | -0.044903 |
| H | -5.330941 | -1.23321  | -0.032089 |
| C | -3.080775 | -1.064085 | 0.177753  |
| C | -2.689335 | -2.391842 | 0.378388  |
| C | 3.433469  | 3.098395  | 0.87732   |
| C | 4.752438  | 3.101994  | 0.385618  |
| H | 5.024703  | 2.417067  | -0.412025 |
| C | 5.706604  | 3.984075  | 0.885283  |
| H | 6.714085  | 3.966282  | 0.476944  |
| C | 5.391016  | 4.897907  | 1.90122   |
| C | 4.082684  | 4.887866  | 2.402495  |
| H | 3.813234  | 5.569181  | 3.205666  |
| C | 3.123775  | 4.007307  | 1.905714  |
| H | 2.127832  | 4.002281  | 2.337036  |
| C | 6.421651  | 5.869942  | 2.422628  |
| H | 7.422507  | 5.427742  | 2.428146  |
| H | 6.185859  | 6.19474   | 3.439976  |
| H | 6.469321  | 6.769243  | 1.795735  |
| C | -3.403263 | 3.492296  | -0.76684  |
| C | -3.381544 | 4.152181  | -2.005801 |
| H | -2.659825 | 3.84608   | -2.757638 |
| C | -4.280456 | 5.180165  | -2.288669 |
| H | -4.244268 | 5.66744   | -3.259985 |
| C | -5.235542 | 5.588358  | -1.348235 |
| C | -5.260813 | 4.925599  | -0.113527 |
| H | -5.991901 | 5.219325  | 0.635757  |
| C | -4.361987 | 3.89939   | 0.174588  |

|   |           |           |           |
|---|-----------|-----------|-----------|
| H | -4.398964 | 3.407829  | 1.142337  |
| C | -6.189021 | 6.721253  | -1.645536 |
| H | -7.130576 | 6.605268  | -1.100827 |
| H | -6.417702 | 6.781613  | -2.713647 |
| H | -5.760147 | 7.687173  | -1.350518 |
| C | -3.72351  | -3.421181 | 0.672052  |
| C | -4.638766 | -3.240755 | 1.723144  |
| H | -4.57161  | -2.348513 | 2.337456  |
| C | -5.616538 | -4.196606 | 1.994235  |
| H | -6.307472 | -4.032042 | 2.817136  |
| C | -5.720927 | -5.366058 | 1.230248  |
| C | -4.8095   | -5.544046 | 0.178877  |
| H | -4.87611  | -6.434999 | -0.440494 |
| C | -3.825998 | -4.597084 | -0.09303  |
| H | -3.142888 | -4.755082 | -0.921571 |
| C | -6.761434 | -6.414362 | 1.54219   |
| H | -6.350563 | -7.196247 | 2.193119  |
| H | -7.117409 | -6.906731 | 0.632218  |
| H | -7.623788 | -5.981988 | 2.057362  |
| N | -0.02164  | 1.870508  | -0.132786 |
| H | -0.18827  | 0.891857  | 0.084134  |
| N | -2.204185 | -0.006693 | 0.044897  |
| S | -0.0597   | -1.802514 | -0.382003 |
| C | 6.78299   | -2.569785 | -1.169797 |
| C | 7.523386  | -3.715704 | -1.34635  |
| H | 8.596438  | -3.652552 | -1.500169 |
| C | 6.892382  | -4.988357 | -1.330985 |
| H | 7.490477  | -5.88339  | -1.473671 |
| C | 5.5346    | -5.090164 | -1.138791 |
| H | 5.049412  | -6.062463 | -1.12777  |
| H | 7.262221  | -1.594513 | -1.184927 |

---

**4a<sub>g</sub>**

---

|   |           |           |           |
|---|-----------|-----------|-----------|
| C | -1.245431 | -2.879079 | 0.299845  |
| C | -0.615143 | -3.975196 | 0.882425  |
| H | -1.13415  | -4.662467 | 1.538857  |
| C | 0.762684  | -4.059081 | 0.597133  |
| H | 1.413503  | -4.812534 | 1.025385  |
| C | 1.237925  | -3.037188 | -0.212402 |
| C | 2.618299  | -2.782492 | -0.621081 |
| C | 3.446174  | -3.882798 | -0.819282 |
| H | 3.015308  | -4.878289 | -0.768091 |
| C | 4.824899  | -3.764315 | -1.097304 |
| C | 5.392157  | -2.452674 | -1.181371 |
| C | 4.54486   | -1.337831 | -0.990402 |
| H | 4.974798  | -0.346128 | -1.092796 |
| C | 3.184028  | -1.448298 | -0.724923 |
| C | 2.413371  | -0.204611 | -0.539051 |
| H | 1.466676  | -0.072041 | -1.04694  |
| C | 2.884969  | 0.816402  | 0.225903  |
| H | 3.83431   | 0.642859  | 0.728552  |
| C | 2.340082  | 2.138077  | 0.445007  |
| C | 1.042386  | 2.585477  | 0.165705  |
| C | 0.698337  | 4.006249  | 0.08445   |
| H | 1.386561  | 4.827843  | 0.215934  |
| C | -0.61162  | 4.073806  | -0.250146 |
| H | -1.209681 | 4.959206  | -0.407505 |
| C | -1.086618 | 2.693665  | -0.333605 |
| C | -2.465927 | 2.36038   | -0.528963 |
| C | -2.978324 | 1.071075  | -0.362086 |
| C | -4.341574 | 0.613148  | -0.489639 |
| H | -5.169756 | 1.234353  | -0.794568 |
| C | -4.378693 | -0.714701 | -0.179267 |
| H | -5.240442 | -1.364348 | -0.204201 |
| C | -3.037873 | -1.161172 | 0.11821   |
| C | -2.621322 | -2.466771 | 0.378232  |
| C | 3.307659  | 3.100159  | 1.044448  |
| C | 4.62196   | 3.20652   | 0.551688  |

|   |           |           |           |
|---|-----------|-----------|-----------|
| H | 4.917522  | 2.61537   | -0.310198 |
| C | 5.538193  | 4.084289  | 1.12435   |
| H | 6.539231  | 4.156891  | 0.706389  |
| C | 5.191392  | 4.881434  | 2.225048  |
| C | 3.887487  | 4.769762  | 2.725218  |
| H | 3.59135   | 5.367716  | 3.583511  |
| C | 2.96441   | 3.897827  | 2.151475  |
| H | 1.968623  | 3.815852  | 2.574693  |
| C | 6.198658  | 5.804159  | 2.867633  |
| H | 6.906199  | 6.198369  | 2.132149  |
| H | 6.785134  | 5.278407  | 3.631615  |
| H | 5.709567  | 6.649993  | 3.359286  |
| C | -3.423417 | 3.452651  | -0.878364 |
| C | -3.276635 | 4.179325  | -2.072832 |
| H | -2.46065  | 3.933128  | -2.745923 |
| C | -4.167218 | 5.195818  | -2.410521 |
| H | -4.031612 | 5.734047  | -3.345566 |
| C | -5.240885 | 5.529854  | -1.572211 |
| C | -5.389241 | 4.805167  | -0.383275 |
| H | -6.210457 | 5.042877  | 0.28841   |
| C | -4.497062 | 3.789019  | -0.038984 |
| H | -4.627214 | 3.254863  | 0.897619  |
| C | -6.18819  | 6.649922  | -1.931173 |
| H | -7.132577 | 6.565029  | -1.386289 |
| H | -6.412081 | 6.656331  | -3.002563 |
| H | -5.755704 | 7.628206  | -1.687094 |
| C | -3.634674 | -3.489412 | 0.743396  |
| C | -4.609214 | -3.232035 | 1.723827  |
| H | -4.604635 | -2.276979 | 2.239512  |
| C | -5.564716 | -4.190937 | 2.056352  |
| H | -6.302664 | -3.963053 | 2.821282  |
| C | -5.58318  | -5.444946 | 1.433039  |
| C | -4.607483 | -5.704452 | 0.458127  |
| H | -4.604044 | -6.665065 | -0.050945 |
| C | -3.649985 | -4.752877 | 0.122191  |
| H | -2.91561  | -4.977417 | -0.64474  |
| C | -6.598238 | -6.495105 | 1.814078  |
| H | -6.17401  | -7.214716 | 2.525387  |
| H | -6.930436 | -7.064734 | 0.940613  |
| H | -7.477937 | -6.049024 | 2.286135  |
| N | -0.07871  | 1.816035  | -0.106923 |
| H | -1.23875  | 0.074823  | 0.179052  |
| N | -2.23401  | -0.032192 | -0.012144 |
| S | -0.072906 | -1.986206 | -0.659034 |
| C | 6.778145  | -2.317737 | -1.472318 |
| C | 7.565155  | -3.430114 | -1.66389  |
| H | 8.622933  | -3.317662 | -1.881963 |
| C | 7.002495  | -4.730935 | -1.580178 |
| H | 7.636207  | -5.598893 | -1.735754 |
| C | 5.66425   | -4.894535 | -1.306073 |
| H | 5.230535  | -5.888949 | -1.243364 |
| H | 7.205631  | -1.320828 | -1.53852  |

---

**4b<sub>1</sub>**

---

|   |           |           |           |
|---|-----------|-----------|-----------|
| C | 0.563845  | 2.741448  | 0.457392  |
| C | -0.456965 | 3.479608  | 1.051917  |
| H | -0.275683 | 4.419445  | 1.557195  |
| C | -1.725301 | 2.879567  | 0.960054  |
| H | -2.619762 | 3.308695  | 1.395677  |
| C | -1.736819 | 1.660785  | 0.29364   |
| C | -2.969597 | 0.91049   | -0.011391 |
| C | -4.041919 | 1.707571  | -0.390057 |
| H | -3.861705 | 2.760279  | -0.581069 |
| C | -5.371237 | 1.233346  | -0.536588 |
| C | -5.62967  | -0.152563 | -0.245549 |
| C | -4.528664 | -0.96746  | 0.116577  |
| H | -4.725172 | -2.018668 | 0.311269  |
| C | -3.213671 | -0.52175  | 0.188656  |

|   |           |           |           |
|---|-----------|-----------|-----------|
| C | -2.250886 | -1.584391 | 0.495412  |
| H | -2.667231 | -2.368851 | 1.123091  |
| C | -0.997626 | -1.795096 | 0.014484  |
| H | -0.562777 | -1.073313 | 0.664599  |
| C | -0.179262 | -2.958384 | 0.279383  |
| C | 1.187102  | -2.906886 | 0.031     |
| C | 2.134594  | -3.994526 | -0.074547 |
| H | 1.875225  | -5.037369 | 0.031861  |
| C | 3.359734  | -3.47817  | -0.377939 |
| H | 4.275934  | -4.025506 | -0.540547 |
| C | 3.243745  | -2.037338 | -0.442162 |
| C | 4.250681  | -1.080435 | -0.600772 |
| C | 3.992961  | 0.321163  | -0.44641  |
| C | 4.981553  | 1.387479  | -0.609083 |
| H | 6.009151  | 1.256512  | -0.915793 |
| C | 4.347024  | 2.550633  | -0.313379 |
| H | 4.754431  | 3.550649  | -0.34595  |
| C | 2.966458  | 2.202235  | 0.010233  |
| C | 1.955437  | 3.100169  | 0.349189  |
| C | -0.776402 | -4.21653  | 0.793216  |
| C | -1.911852 | -4.786621 | 0.184693  |
| H | -2.35436  | -4.296806 | -0.677122 |
| C | -2.455237 | -5.978039 | 0.653754  |
| H | -3.322407 | -6.40103  | 0.152299  |
| C | -1.899509 | -6.649695 | 1.754367  |
| C | -0.773804 | -6.082505 | 2.363015  |
| H | -0.324123 | -6.576014 | 3.220902  |
| C | -0.222815 | -4.889219 | 1.896067  |
| H | 0.638696  | -4.462529 | 2.400229  |
| C | -2.51338  | -7.928189 | 2.271576  |
| H | -3.442088 | -7.728075 | 2.819973  |
| H | -1.835547 | -8.45056  | 2.951897  |
| H | -2.766131 | -8.609519 | 1.452589  |
| C | 5.636558  | -1.549466 | -0.887385 |
| C | 5.91724   | -2.323291 | -2.026137 |
| H | 5.113067  | -2.562733 | -2.715758 |
| C | 7.211203  | -2.767627 | -2.295453 |
| H | 7.395966  | -3.357587 | -3.189932 |
| C | 8.27853   | -2.455544 | -1.44331  |
| C | 8.001423  | -1.678422 | -0.311003 |
| H | 8.808661  | -1.41989  | 0.371109  |
| C | 6.708639  | -1.237299 | -0.033555 |
| H | 6.522661  | -0.649636 | 0.860459  |
| C | 9.674633  | -2.95935  | -1.72208  |
| H | 10.433032 | -2.260607 | -1.356586 |
| H | 9.838466  | -3.111062 | -2.792955 |
| H | 9.855121  | -3.921509 | -1.226312 |
| C | 2.305905  | 4.520956  | 0.626348  |
| C | 3.293073  | 4.851929  | 1.569096  |
| H | 3.790129  | 4.058465  | 2.117831  |
| C | 3.627499  | 6.182554  | 1.82044   |
| H | 4.391234  | 6.408409  | 2.560164  |
| C | 2.993186  | 7.231147  | 1.143809  |
| C | 2.006975  | 6.900305  | 0.201317  |
| H | 1.505234  | 7.693222  | -0.347875 |
| C | 1.663239  | 5.575633  | -0.048881 |
| H | 0.903209  | 5.348138  | -0.789684 |
| C | 3.339037  | 8.672806  | 1.428396  |
| H | 2.543383  | 9.164707  | 2.001076  |
| H | 3.46584   | 9.243084  | 0.502318  |
| H | 4.262327  | 8.75553   | 2.007887  |
| N | 1.913889  | -1.750068 | -0.225794 |
| H | 1.644937  | -0.782053 | -0.045818 |
| N | 2.793781  | 0.835712  | -0.10173  |
| S | -0.1092   | 1.2613    | -0.205675 |
| C | -6.939785 | -0.645208 | -0.3494   |
| C | -8.000731 | 0.1827    | -0.732745 |
| C | -7.739149 | 1.575753  | -1.03185  |
| C | -6.43159  | 2.064034  | -0.927046 |

|   |            |           |           |
|---|------------|-----------|-----------|
| H | -6.235028  | 3.110546  | -1.147166 |
| H | -7.133652  | -1.692311 | -0.129738 |
| C | -10.362921 | 0.532971  | -1.219786 |
| C | -9.343795  | -0.300233 | -0.841725 |
| H | -9.538327  | -1.345444 | -0.616813 |
| H | -11.377242 | 0.153253  | -1.297822 |
| C | -10.104862 | 1.905693  | -1.514907 |
| H | -10.926632 | 2.549701  | -1.813336 |
| C | -8.834367  | 2.409289  | -1.423778 |
| H | -8.636076  | 3.453961  | -1.648016 |

---



---

**4b<sub>2</sub>**

---



---

|   |           |           |           |
|---|-----------|-----------|-----------|
| C | 0.447119  | 2.42475   | 0.847212  |
| C | 0.347262  | 1.502355  | 1.869681  |
| H | 1.144785  | 1.353261  | 2.586872  |
| C | -0.865918 | 0.776277  | 1.871194  |
| H | -1.107558 | 0.003873  | 2.591364  |
| C | -1.707682 | 1.109096  | 0.832663  |
| C | -2.990187 | 0.493247  | 0.464946  |
| C | -4.094368 | 1.298332  | 0.284959  |
| H | -3.983873 | 2.374158  | 0.39021   |
| C | -5.395397 | 0.778618  | 0.02912   |
| C | -5.555226 | -0.654585 | -0.0129   |
| C | -4.40175  | -1.466297 | 0.148984  |
| H | -4.526301 | -2.54382  | 0.07546   |
| C | -3.12342  | -0.954509 | 0.334024  |
| C | -2.039206 | -1.934659 | 0.333065  |
| H | -2.395497 | -2.948632 | 0.496917  |
| C | -0.704845 | -1.801361 | 0.068288  |
| H | -0.297405 | -0.815676 | -0.123417 |
| C | 0.228562  | -2.899195 | 0.02216   |
| C | 1.603076  | -2.688547 | -0.050118 |
| C | 2.638533  | -3.675974 | -0.278736 |
| H | 2.449534  | -4.729453 | -0.419972 |
| C | 3.845312  | -3.044787 | -0.328512 |
| H | 4.809432  | -3.494006 | -0.5138   |
| C | 3.627163  | -1.630281 | -0.115797 |
| C | 4.559987  | -0.586744 | -0.095367 |
| C | 4.141612  | 0.775909  | 0.068726  |
| C | 5.001448  | 1.964034  | 0.103568  |
| H | 6.081097  | 1.968523  | 0.050814  |
| C | 4.175538  | 3.035826  | 0.226981  |
| H | 4.455995  | 4.075582  | 0.31875   |
| C | 2.814939  | 2.506335  | 0.304309  |
| C | 1.620397  | 3.201516  | 0.460147  |
| C | -0.262916 | -4.3074   | 0.054779  |
| C | -1.142565 | -4.791105 | -0.930388 |
| H | -1.465399 | -4.127243 | -1.726733 |
| C | -1.585614 | -6.110914 | -0.910831 |
| H | -2.25318  | -6.460031 | -1.694867 |
| C | -1.179076 | -7.000482 | 0.09528   |
| C | -0.306109 | -6.518643 | 1.078108  |
| H | 0.025529  | -7.183916 | 1.871422  |
| C | 0.142918  | -5.197828 | 1.061652  |
| H | 0.811987  | -4.847699 | 1.841984  |
| C | -1.688535 | -8.421521 | 0.12778   |
| H | -2.682904 | -8.474604 | 0.588344  |
| H | -1.025776 | -9.07082  | 0.706573  |
| H | -1.778615 | -8.836996 | -0.88065  |
| C | 6.006169  | -0.905004 | -0.256537 |
| C | 6.76546   | -0.341255 | -1.296638 |
| H | 6.283815  | 0.327033  | -2.004245 |
| C | 8.119991  | -0.636566 | -1.441713 |
| H | 8.678712  | -0.184984 | -2.257895 |
| C | 8.772272  | -1.511539 | -0.562287 |
| C | 8.017702  | -2.072982 | 0.476226  |
| H | 8.498599  | -2.744292 | 1.183637  |
| C | 6.664273  | -1.77541  | 0.629436  |

|   |            |           |           |
|---|------------|-----------|-----------|
| H | 6.110566   | -2.20674  | 1.458109  |
| C | 10.231495  | -1.85668  | -0.742107 |
| H | 10.709981  | -2.081533 | 0.215738  |
| H | 10.781627  | -1.037467 | -1.214309 |
| H | 10.353894  | -2.740499 | -1.380842 |
| C | 1.489861   | 4.64736   | 0.22016   |
| C | 2.224714   | 5.310135  | -0.783763 |
| H | 2.879148   | 4.73609   | -1.430706 |
| C | 2.0866     | 6.680152  | -0.986807 |
| H | 2.658008   | 7.159993  | -1.777276 |
| C | 1.207698   | 7.447957  | -0.209616 |
| C | 0.458737   | 6.786861  | 0.775815  |
| H | -0.236436  | 7.354855  | 1.388843  |
| C | 0.59055    | 5.418807  | 0.985199  |
| H | 0.007624   | 4.934898  | 1.762557  |
| C | 1.079898   | 8.937118  | -0.415932 |
| H | 1.758219   | 9.485707  | 0.24974   |
| H | 0.065249   | 9.285429  | -0.201359 |
| H | 1.330635   | 9.222088  | -1.441607 |
| N | 2.266361   | -1.472515 | 0.03812   |
| H | 1.90515    | -0.525806 | 0.187735  |
| N | 2.854277   | 1.12522   | 0.21562   |
| S | -1.018931  | 2.403147  | -0.12314  |
| C | -6.831973  | -1.19367  | -0.231385 |
| C | -7.952636  | -0.373105 | -0.409501 |
| C | -7.790532  | 1.064127  | -0.364453 |
| C | -6.514664  | 1.601077  | -0.144152 |
| H | -6.392063  | 2.680843  | -0.107485 |
| H | -6.953378  | -2.273648 | -0.266424 |
| C | -10.339169 | -0.080075 | -0.806623 |
| C | -9.260406  | -0.907467 | -0.635833 |
| H | -9.380766  | -1.986952 | -0.669427 |
| H | -11.326112 | -0.499467 | -0.977548 |
| C | -10.178894 | 1.336793  | -0.761911 |
| H | -11.045929 | 1.975826  | -0.899643 |
| C | -8.943348  | 1.889883  | -0.547442 |
| H | -8.819057  | 2.968945  | -0.513484 |

---



---

**4b<sub>3</sub>**

---



---

|   |           |           |           |
|---|-----------|-----------|-----------|
| C | 0.447452  | 2.456699  | 0.82937   |
| C | 0.326857  | 1.575455  | 1.884531  |
| H | 1.099794  | 1.466774  | 2.636589  |
| C | -0.879098 | 0.832274  | 1.879841  |
| H | -1.131807 | 0.087231  | 2.624663  |
| C | -1.697294 | 1.120045  | 0.812096  |
| C | -2.977821 | 0.495564  | 0.447744  |
| C | -4.081069 | 1.296171  | 0.247509  |
| H | -3.971774 | 2.3738    | 0.333281  |
| C | -5.380366 | 0.770801  | -0.008348 |
| C | -5.539222 | -0.662753 | -0.027927 |
| C | -4.386183 | -1.470574 | 0.156685  |
| H | -4.508983 | -2.549324 | 0.101004  |
| C | -3.110504 | -0.953357 | 0.342673  |
| C | -2.026071 | -1.933424 | 0.357974  |
| H | -2.386494 | -2.945949 | 0.521175  |
| C | -0.689874 | -1.800844 | 0.107659  |
| H | -0.254624 | -0.826416 | -0.07007  |
| C | 0.237752  | -2.904859 | 0.067873  |
| C | 1.613097  | -2.683869 | -0.019511 |
| C | 2.627358  | -3.709049 | -0.253987 |
| H | 2.436996  | -4.764445 | -0.38499  |
| C | 3.821053  | -3.068471 | -0.323486 |
| H | 4.792052  | -3.500723 | -0.517967 |
| C | 3.542912  | -1.645617 | -0.11357  |
| C | 4.531872  | -0.603686 | -0.127407 |
| C | 4.172999  | 0.739615  | 0.012095  |
| C | 4.995445  | 1.934658  | 0.02582   |
| H | 6.072879  | 1.93764   | -0.046874 |

|   |            |           |           |
|---|------------|-----------|-----------|
| C | 4.178163   | 3.017404  | 0.162345  |
| H | 4.478615   | 4.051859  | 0.237185  |
| C | 2.807873   | 2.550613  | 0.268429  |
| C | 1.622462   | 3.244582  | 0.448982  |
| C | -0.262363  | -4.308193 | 0.115282  |
| C | -1.159228  | -4.795062 | -0.852707 |
| H | -1.49018   | -4.136799 | -1.650285 |
| C | -1.605062  | -6.113764 | -0.817958 |
| H | -2.284072  | -6.466517 | -1.590396 |
| C | -1.188068  | -6.996712 | 0.189367  |
| C | -0.299028  | -6.510858 | 1.156069  |
| H | 0.04171    | -7.171538 | 1.949341  |
| C | 0.15705    | -5.193269 | 1.121808  |
| H | 0.841068   | -4.840141 | 1.887353  |
| C | -1.702316  | -8.415384 | 0.240863  |
| H | -2.680928  | -8.4633   | 0.734641  |
| H | -1.023604  | -9.066687 | 0.798591  |
| H | -1.827604  | -8.83177  | -0.763314 |
| C | 5.970429   | -0.949361 | -0.306591 |
| C | 6.72102    | -0.42616  | -1.372489 |
| H | 6.235676   | 0.223461  | -2.094904 |
| C | 8.071901   | -0.738784 | -1.525442 |
| H | 8.624494   | -0.317239 | -2.361577 |
| C | 8.725716   | -1.593713 | -0.62933  |
| C | 7.97772    | -2.118179 | 0.434383  |
| H | 8.460576   | -2.774878 | 1.15412   |
| C | 6.630166   | -1.803004 | 0.595361  |
| H | 6.081315   | -2.20865  | 1.440086  |
| C | 10.179076  | -1.960384 | -0.814289 |
| H | 10.687332  | -2.077372 | 0.147797  |
| H | 10.713267  | -1.200632 | -1.391937 |
| H | 10.282582  | -2.911389 | -1.351668 |
| C | 1.502079   | 4.697259  | 0.248492  |
| C | 2.241446   | 5.388838  | -0.732472 |
| H | 2.894714   | 4.834979  | -1.398373 |
| C | 2.109892   | 6.765347  | -0.893714 |
| H | 2.687199   | 7.266082  | -1.666951 |
| C | 1.229081   | 7.513008  | -0.099637 |
| C | 0.472403   | 6.823277  | 0.859673  |
| H | -0.226833  | 7.373359  | 1.484539  |
| C | 0.601278   | 5.449365  | 1.030648  |
| H | 0.010972   | 4.944462  | 1.789065  |
| C | 1.106663   | 9.00829   | -0.261853 |
| H | 1.782208   | 9.536186  | 0.423198  |
| H | 0.091565   | 9.353059  | -0.043353 |
| H | 1.363583   | 9.32301   | -1.277365 |
| N | 2.219884   | -1.440185 | 0.055694  |
| H | 2.126472   | 0.481112  | 0.203712  |
| N | 2.883558   | 1.168181  | 0.183443  |
| S | -0.989131  | 2.374232  | -0.183043 |
| C | -6.81329   | -1.207362 | -0.246667 |
| C | -7.933526  | -0.391057 | -0.446428 |
| C | -7.772737  | 1.046716  | -0.423958 |
| C | -6.498921  | 1.588926  | -0.203361 |
| H | -6.377869  | 2.669261  | -0.183778 |
| H | -6.933064  | -2.2879   | -0.264651 |
| C | -10.317065 | -0.10739  | -0.865937 |
| C | -9.23884   | -0.930749 | -0.673521 |
| H | -9.3578    | -2.010749 | -0.690184 |
| H | -11.302356 | -0.530427 | -1.03721  |
| C | -10.158184 | 1.310063  | -0.843388 |
| H | -11.024736 | 1.945866  | -0.998012 |
| C | -8.924824  | 1.868138  | -0.62899  |
| H | -8.801911  | 2.947716  | -0.611965 |

---



---

**4b<sub>4</sub>**

---



---

|   |           |          |          |
|---|-----------|----------|----------|
| C | 0.501149  | 2.685407 | 0.511112 |
| C | -0.347778 | 3.026968 | 1.545931 |

|   |           |           |           |
|---|-----------|-----------|-----------|
| H | -0.058054 | 3.720595  | 2.326344  |
| C | -1.592677 | 2.351691  | 1.512992  |
| H | -2.367104 | 2.480491  | 2.260515  |
| C | -1.736181 | 1.479759  | 0.455286  |
| C | -2.986978 | 0.761556  | 0.113226  |
| C | -4.072867 | 1.581878  | -0.12174  |
| H | -3.917604 | 2.656487  | -0.122106 |
| C | -5.388858 | 1.099762  | -0.373165 |
| C | -5.595419 | -0.324604 | -0.358221 |
| C | -4.477878 | -1.156351 | -0.096304 |
| H | -4.647398 | -2.229663 | -0.074808 |
| C | -3.184813 | -0.688641 | 0.120722  |
| C | -2.204957 | -1.742684 | 0.372448  |
| H | -2.678537 | -2.695648 | 0.593285  |
| C | -0.845082 | -1.748816 | 0.300799  |
| H | -0.301027 | -0.849582 | 0.055607  |
| C | -0.013992 | -2.912933 | 0.484992  |
| C | 1.36457   | -2.808422 | 0.319998  |
| C | 2.322457  | -3.910365 | 0.309151  |
| H | 2.088001  | -4.950329 | 0.485771  |
| C | 3.531005  | -3.371234 | 0.008362  |
| H | 4.477303  | -3.883453 | -0.090723 |
| C | 3.314173  | -1.93039  | -0.156261 |
| C | 4.335042  | -0.964833 | -0.457552 |
| C | 4.06397   | 0.404649  | -0.433262 |
| C | 4.932885  | 1.525929  | -0.730038 |
| H | 5.951135  | 1.435327  | -1.077437 |
| C | 4.236808  | 2.676512  | -0.51531  |
| H | 4.587451  | 3.686079  | -0.667815 |
| C | 2.893761  | 2.334843  | -0.083086 |
| C | 1.855465  | 3.177527  | 0.277487  |
| C | -0.607474 | -4.239938 | 0.816461  |
| C | -1.491286 | -4.887328 | -0.06419  |
| H | -1.744448 | -4.415473 | -1.008796 |
| C | -2.02932  | -6.133549 | 0.249717  |
| H | -2.703823 | -6.614741 | -0.454281 |
| C | -1.713095 | -6.780452 | 1.453041  |
| C | -0.837197 | -6.131745 | 2.33261   |
| H | -0.580084 | -6.604753 | 3.27705   |
| C | -0.290974 | -4.886664 | 2.021505  |
| H | 0.379583  | -4.40086  | 2.723882  |
| C | -2.27839  | -8.143117 | 1.775255  |
| H | -3.29683  | -8.255088 | 1.391026  |
| H | -2.298608 | -8.322996 | 2.853816  |
| H | -1.673181 | -8.938631 | 1.322872  |
| C | 5.713112  | -1.426541 | -0.782511 |
| C | 5.945271  | -2.318633 | -1.845286 |
| H | 5.105598  | -2.663645 | -2.441315 |
| C | 7.233059  | -2.747517 | -2.15786  |
| H | 7.378821  | -3.429977 | -2.991863 |
| C | 8.345154  | -2.305036 | -1.426829 |
| C | 8.116795  | -1.41446  | -0.370614 |
| H | 8.958185  | -1.055584 | 0.217177  |
| C | 6.828154  | -0.987214 | -0.04963  |
| H | 6.680653  | -0.313152 | 0.788963  |
| C | 9.735908  | -2.79366  | -1.755009 |
| H | 10.500623 | -2.118397 | -1.361047 |
| H | 9.883732  | -2.882436 | -2.835892 |
| H | 9.92034   | -3.785077 | -1.322711 |
| C | 2.096203  | 4.620537  | 0.509497  |
| C | 3.222368  | 5.083218  | 1.216225  |
| H | 3.921233  | 4.365493  | 1.633072  |
| C | 3.436922  | 6.445717  | 1.415457  |
| H | 4.31439   | 6.769834  | 1.969375  |
| C | 2.535557  | 7.402885  | 0.932576  |
| C | 1.403871  | 6.943012  | 0.241193  |
| H | 0.688866  | 7.662659  | -0.149865 |
| C | 1.182442  | 5.585117  | 0.039577  |
| H | 0.302145  | 5.259752  | -0.505654 |

|   |            |           |           |
|---|------------|-----------|-----------|
| C | 2.752043   | 8.876624  | 1.17651   |
| H | 2.196508   | 9.217505  | 2.059248  |
| H | 2.407428   | 9.476292  | 0.328476  |
| H | 3.808061   | 9.102726  | 1.348771  |
| N | 2.021662   | -1.618614 | 0.045237  |
| H | 2.077607   | 0.320665  | 0.14994   |
| N | 2.849018   | 0.947221  | -0.087861 |
| S | -0.305404  | 1.538869  | -0.556284 |
| C | -6.880338  | -0.834574 | -0.598551 |
| C | -7.965043  | 0.013181  | -0.853498 |
| C | -7.755475  | 1.445271  | -0.867787 |
| C | -6.470417  | 1.950861  | -0.626453 |
| H | -6.311634  | 3.026447  | -0.636721 |
| H | -7.036668  | -1.910488 | -0.587996 |
| C | -10.324908 | 0.364568  | -1.349352 |
| C | -9.281711  | -0.488583 | -1.102653 |
| H | -9.437379  | -1.563972 | -1.091967 |
| H | -11.319097 | -0.029871 | -1.536703 |
| C | -10.117996 | 1.776073  | -1.362714 |
| H | -10.95755  | 2.435763  | -1.560242 |
| C | -8.872656  | 2.298446  | -1.129084 |
| H | -8.713225  | 3.373313  | -1.139355 |

---



---

**4b<sub>s</sub>**

---



---

|   |           |           |           |
|---|-----------|-----------|-----------|
| C | 0.906271  | 2.993415  | 0.400276  |
| C | -0.035222 | 3.921018  | 0.848745  |
| H | 0.247083  | 4.840888  | 1.344606  |
| C | -1.366934 | 3.529963  | 0.641206  |
| H | -2.212658 | 4.11789   | 0.977033  |
| C | -1.502534 | 2.29012   | 0.023992  |
| C | -2.750252 | 1.596102  | -0.286541 |
| C | -3.902505 | 2.35779   | -0.413241 |
| H | -3.826564 | 3.440159  | -0.391104 |
| C | -5.193296 | 1.79248   | -0.574795 |
| C | -5.309413 | 0.356164  | -0.613647 |
| C | -4.118071 | -0.414441 | -0.519522 |
| H | -4.203493 | -1.49319  | -0.607024 |
| C | -2.85987  | 0.141588  | -0.38067  |
| C | -1.703129 | -0.775045 | -0.342406 |
| H | -0.88941  | -0.602759 | -1.039205 |
| C | -1.693032 | -1.884722 | 0.443414  |
| H | -2.55918  | -2.022175 | 1.088     |
| C | -0.737346 | -2.969572 | 0.507884  |
| C | 0.601594  | -2.935438 | 0.122396  |
| C | 1.433839  | -4.091401 | -0.127049 |
| H | 1.082187  | -5.110189 | -0.075396 |
| C | 2.678917  | -3.671733 | -0.480307 |
| H | 3.525467  | -4.28772  | -0.741526 |
| C | 2.704388  | -2.229582 | -0.438136 |
| C | 3.826946  | -1.413906 | -0.599319 |
| C | 3.828848  | -0.001651 | -0.377197 |
| C | 5.002352  | 0.860996  | -0.511722 |
| H | 5.986031  | 0.548116  | -0.830114 |
| C | 4.600299  | 2.111816  | -0.169417 |
| H | 5.187371  | 3.018758  | -0.174852 |
| C | 3.177604  | 2.019091  | 0.13743   |
| C | 2.335123  | 3.099117  | 0.414441  |
| C | -1.276496 | -4.246006 | 1.053226  |
| C | -2.534702 | -4.727214 | 0.644599  |
| H | -3.092367 | -4.183767 | -0.11253  |
| C | -3.065722 | -5.900158 | 1.174384  |
| H | -4.036416 | -6.248239 | 0.829816  |
| C | -2.370283 | -6.642991 | 2.139318  |
| C | -1.124281 | -6.158908 | 2.559656  |
| H | -0.570771 | -6.699499 | 3.323375  |
| C | -0.588358 | -4.985672 | 2.032933  |
| H | 0.363649  | -4.619366 | 2.403612  |
| C | -2.936972 | -7.92845  | 2.691883  |

|   |            |           |           |
|---|------------|-----------|-----------|
| H | -4.029516  | -7.89642  | 2.73997   |
| H | -2.556228  | -8.13367  | 3.696468  |
| H | -2.66566   | -8.783454 | 2.059875  |
| C | 5.112323   | -2.077571 | -0.981888 |
| C | 5.258864   | -2.704488 | -2.228964 |
| H | 4.428113   | -2.695738 | -2.928681 |
| C | 6.457279   | -3.322576 | -2.587281 |
| H | 6.542533   | -3.793725 | -3.563405 |
| C | 7.554775   | -3.337109 | -1.717393 |
| C | 7.41048    | -2.705663 | -0.473748 |
| H | 8.245366   | -2.699546 | 0.222896  |
| C | 6.213947   | -2.090466 | -0.110306 |
| H | 6.1273     | -1.616523 | 0.863046  |
| C | 8.843709   | -4.028365 | -2.093931 |
| H | 9.715141   | -3.480528 | -1.722252 |
| H | 8.94129    | -4.128511 | -3.178573 |
| H | 8.891171   | -5.037778 | -1.666582 |
| C | 2.928242   | 4.43049   | 0.713702  |
| C | 3.908588   | 4.571185  | 1.710916  |
| H | 4.215691   | 3.699321  | 2.279695  |
| C | 4.476624   | 5.813659  | 1.987585  |
| H | 5.228957   | 5.892201  | 2.768264  |
| C | 4.091908   | 6.961557  | 1.283041  |
| C | 3.115054   | 6.820325  | 0.286042  |
| H | 2.806733   | 7.691275  | -0.286902 |
| C | 2.537993   | 5.584054  | 0.009558  |
| H | 1.793971   | 5.502217  | -0.776452 |
| C | 4.687272   | 8.311591  | 1.602006  |
| H | 4.050727   | 8.868249  | 2.301129  |
| H | 4.790691   | 8.925328  | 0.702045  |
| H | 5.673082   | 8.214818  | 2.065371  |
| N | 1.416063   | -1.829941 | -0.12066  |
| H | 1.224666   | -0.859446 | 0.113213  |
| N | 2.749854   | 0.712807  | 0.004283  |
| S | 0.07188    | 1.60317   | -0.281606 |
| C | -6.574155  | -0.226793 | -0.77138  |
| C | -7.730769  | 0.554343  | -0.885181 |
| C | -7.615096  | 1.997029  | -0.846532 |
| C | -6.35068   | 2.577428  | -0.695936 |
| H | -6.263022  | 3.660892  | -0.66812  |
| H | -6.659434  | -1.31033  | -0.804185 |
| C | -10.143996 | 0.764758  | -1.151484 |
| C | -9.029767  | -0.024611 | -1.040731 |
| H | -9.114452  | -1.107677 | -1.069139 |
| H | -11.123807 | 0.311713  | -1.269269 |
| C | -10.03027  | 2.187038  | -1.113324 |
| H | -10.925279 | 2.795442  | -1.202612 |
| C | -8.805636  | 2.782567  | -0.96556  |
| H | -8.717162  | 3.865291  | -0.936289 |

---

**4b<sub>8</sub>**

---

|   |           |           |           |
|---|-----------|-----------|-----------|
| C | 0.88867   | 3.01865   | 0.435595  |
| C | -0.042978 | 3.808295  | 1.102408  |
| H | 0.246818  | 4.615739  | 1.76328   |
| C | -1.380396 | 3.413217  | 0.89265   |
| H | -2.223527 | 3.87895   | 1.389665  |
| C | -1.522171 | 2.314124  | 0.05873   |
| C | -2.752233 | 1.607042  | -0.295329 |
| C | -3.912745 | 2.350801  | -0.41695  |
| H | -3.852614 | 3.433002  | -0.352237 |
| C | -5.188603 | 1.764366  | -0.631077 |
| C | -5.268954 | 0.32846   | -0.731048 |
| C | -4.065888 | -0.423045 | -0.619778 |
| H | -4.1295   | -1.500886 | -0.733166 |
| C | -2.82407  | 0.151419  | -0.418613 |
| C | -1.654954 | -0.74423  | -0.312823 |
| H | -0.76513  | -0.544458 | -0.89699  |
| C | -1.684171 | -1.857438 | 0.466362  |

|   |            |           |           |
|---|------------|-----------|-----------|
| H | -2.592784  | -2.016694 | 1.043455  |
| C | -0.704092  | -2.913748 | 0.610975  |
| C | 0.643922   | -2.882475 | 0.23726   |
| C | 1.453292   | -4.093726 | 0.089905  |
| H | 1.104623   | -5.104604 | 0.239745  |
| C | 2.677615   | -3.698186 | -0.330831 |
| H | 3.533157   | -4.318284 | -0.5544   |
| C | 2.63684    | -2.238171 | -0.401062 |
| C | 3.798061   | -1.442419 | -0.671096 |
| C | 3.839928   | -0.058688 | -0.485131 |
| C | 4.9469     | 0.850421  | -0.671703 |
| H | 5.916766   | 0.564589  | -1.049224 |
| C | 4.541403   | 2.100375  | -0.30717  |
| H | 5.11989    | 3.010633  | -0.352946 |
| C | 3.151601   | 2.043878  | 0.084015  |
| C | 2.325385   | 3.114467  | 0.421041  |
| C | -1.238124  | -4.155365 | 1.237991  |
| C | -2.471863  | -4.698305 | 0.831615  |
| H | -3.018188  | -4.230795 | 0.017675  |
| C | -2.990384  | -5.840869 | 1.434049  |
| H | -3.939716  | -6.241832 | 1.087466  |
| C | -2.309914  | -6.485582 | 2.47761   |
| C | -1.091304  | -5.936885 | 2.897532  |
| H | -0.55105   | -6.40077  | 3.718972  |
| C | -0.564391  | -4.79695  | 2.293439  |
| H | 0.368144   | -4.378539 | 2.657682  |
| C | -2.864649  | -7.737906 | 3.112072  |
| H | -3.958085  | -7.71848  | 3.147158  |
| H | -2.491793  | -7.868556 | 4.13192   |
| H | -2.575369  | -8.629927 | 2.542288  |
| C | 5.047743   | -2.127285 | -1.118439 |
| C | 5.078704   | -2.847958 | -2.32444  |
| H | 4.182388   | -2.897597 | -2.935828 |
| C | 6.24249    | -3.483342 | -2.753638 |
| H | 6.236277   | -4.025606 | -3.696087 |
| C | 7.422557   | -3.426437 | -1.998968 |
| C | 7.393283   | -2.707026 | -0.797267 |
| H | 8.292049   | -2.646325 | -0.188291 |
| C | 6.229596   | -2.073504 | -0.361675 |
| H | 6.232289   | -1.53709  | 0.582658  |
| C | 8.674003   | -4.139926 | -2.452368 |
| H | 9.575005   | -3.640435 | -2.084434 |
| H | 8.732804   | -4.189803 | -3.543665 |
| H | 8.69892    | -5.171411 | -2.079001 |
| C | 2.939159   | 4.419911  | 0.774015  |
| C | 4.006006   | 4.499893  | 1.686403  |
| H | 4.370574   | 3.592976  | 2.15821   |
| C | 4.585319   | 5.726159  | 2.008746  |
| H | 5.406015   | 5.755243  | 2.720915  |
| C | 4.121575   | 6.920229  | 1.442789  |
| C | 3.053396   | 6.841616  | 0.535641  |
| H | 2.679212   | 7.750765  | 0.071486  |
| C | 2.46908    | 5.621731  | 0.21078   |
| H | 1.65172    | 5.590597  | -0.502572 |
| C | 4.727704   | 8.25171   | 1.814544  |
| H | 4.120822   | 8.764227  | 2.571323  |
| H | 4.790302   | 8.917569  | 0.948218  |
| H | 5.733125   | 8.132513  | 2.227486  |
| N | 1.406888   | -1.768407 | -0.082951 |
| H | 1.902691   | 0.255041  | 0.191931  |
| N | 2.783715   | 0.707742  | -0.048619 |
| S | 0.040228   | 1.798622  | -0.504042 |
| C | -6.514962  | -0.275196 | -0.948477 |
| C | -7.68621   | 0.484134  | -1.063381 |
| C | -7.60552   | 1.925822  | -0.96303  |
| C | -6.358894  | 2.527467  | -0.752755 |
| H | -6.297161  | 3.610563  | -0.67915  |
| H | -6.574208  | -1.358155 | -1.02628  |
| C | -10.095535 | 0.651477  | -1.387946 |



|   |            |           |           |
|---|------------|-----------|-----------|
| C | -8.966467  | -0.116872 | -1.278309 |
| H | -9.024921  | -1.19946  | -1.352804 |
| H | -11.06098  | 0.181945  | -1.551026 |
| C | -10.01606  | 2.072917  | -1.289314 |
| H | -10.922237 | 2.664511  | -1.378854 |
| C | -8.809829  | 2.688991  | -1.083665 |
| H | -8.747415  | 3.771297  | -1.008221 |

**9a**

|   |           |           |           |
|---|-----------|-----------|-----------|
| N | 1.477353  | -1.316956 | 0.002858  |
| H | -1.18395  | 0.303918  | 0.09876   |
| H | 1.183995  | -0.303838 | 0.098872  |
| N | -1.477362 | 1.317003  | 0.002658  |
| C | -1.586969 | -3.51545  | -0.467407 |
| H | -1.283085 | -4.526147 | -0.703341 |
| C | -0.713304 | -2.396257 | -0.217756 |
| C | 0.696969  | -2.419065 | -0.211346 |
| C | 1.577804  | -3.524356 | -0.404155 |
| H | 1.271977  | -4.541602 | -0.602565 |
| C | 2.865846  | -3.051366 | -0.294771 |
| H | 3.764763  | -3.63541  | -0.417761 |
| C | 2.800814  | -1.640051 | -0.038901 |
| C | 3.903721  | -0.728694 | 0.150909  |
| C | 2.753226  | 1.611896  | -0.057267 |
| C | 2.859561  | 3.031942  | -0.367072 |
| H | 3.765945  | 3.593926  | -0.535759 |
| C | 1.586961  | 3.51538   | -0.467489 |
| H | 1.28307   | 4.526066  | -0.703455 |
| C | 0.713299  | 2.396197  | -0.217825 |
| C | -0.696969 | 2.419144  | -0.211219 |
| C | -1.577806 | 3.524461  | -0.403864 |
| H | -1.271991 | 4.541769  | -0.601971 |
| C | -2.865847 | 3.051405  | -0.294797 |
| H | -3.764752 | 3.63549   | -0.417675 |
| C | -2.800816 | 1.640059  | -0.039082 |
| C | -3.881919 | -0.725796 | 0.143601  |
| C | -2.753245 | -1.611952 | -0.057256 |
| C | -2.859576 | -3.031987 | -0.367102 |
| H | -3.765958 | -3.593965 | -0.535823 |
| N | -1.442567 | -1.273906 | 0.020785  |
| N | 1.442544  | 1.273822  | 0.020732  |
| C | -3.903709 | 0.728691  | 0.150831  |
| C | -5.134724 | -1.385386 | 0.340713  |
| H | -5.138973 | -2.466057 | 0.382951  |
| C | -5.167193 | 1.364849  | 0.348531  |
| H | -5.19341  | 2.445849  | 0.391527  |
| C | 5.167208  | -1.364852 | 0.348603  |
| H | 5.193405  | -2.445852 | 0.391664  |
| C | 3.881936  | 0.725786  | 0.143491  |
| C | 5.134741  | 1.385389  | 0.340599  |
| H | 5.139014  | 2.466063  | 0.382706  |
| C | 6.326139  | 0.727411  | 0.524079  |
| H | 7.239542  | 1.292281  | 0.682837  |
| C | 6.343744  | -0.679927 | 0.526508  |
| H | 7.270432  | -1.222629 | 0.685226  |
| C | -6.326135 | -0.727404 | 0.524096  |
| H | -7.239541 | -1.292264 | 0.682868  |
| C | -6.343733 | 0.679934  | 0.526449  |
| H | -7.270422 | 1.222649  | 0.685116  |

**9b**

|   |           |           |           |
|---|-----------|-----------|-----------|
| N | -1.471    | 1.329483  | -0.212447 |
| H | 1.178908  | -0.321249 | -0.091744 |
| H | -1.178729 | 0.321644  | -0.0918   |
| N | 1.470962  | -1.329391 | -0.211945 |
| C | 1.604612  | 3.482747  | -0.809608 |
| H | 1.307804  | 4.480234  | -1.103587 |

|   |           |           |           |
|---|-----------|-----------|-----------|
| C | 0.723073  | 2.38766   | -0.494158 |
| C | -0.687034 | 2.419428  | -0.483669 |
| C | -1.565977 | 3.515053  | -0.725167 |
| H | -1.258872 | 4.520837  | -0.97363  |
| C | -2.856499 | 3.049349  | -0.589    |
| H | -3.758158 | 3.623363  | -0.739088 |
| C | -2.791357 | 1.655381  | -0.266057 |
| C | -3.89869  | 0.753884  | -0.019087 |
| C | -2.754519 | -1.596928 | -0.29622  |
| C | -2.874533 | -2.993263 | -0.68793  |
| H | -3.788892 | -3.52981  | -0.894591 |
| C | -1.60462  | -3.482812 | -0.809586 |
| H | -1.30783  | -4.480218 | -1.103859 |
| C | -0.723064 | -2.387795 | -0.493798 |
| C | 0.68703   | -2.419352 | -0.483422 |
| C | 1.565983  | -3.514871 | -0.725434 |
| H | 1.258848  | -4.520592 | -0.974119 |
| C | 2.856486  | -3.049188 | -0.589296 |
| H | 3.758162  | -3.623092 | -0.739704 |
| C | 2.791317  | -1.655298 | -0.265985 |
| C | 3.881914  | 0.715118  | -0.035673 |
| C | 2.754525  | 1.596849  | -0.29651  |
| C | 2.874537  | 2.993246  | -0.687841 |
| H | 3.788899  | 3.529867  | -0.894286 |
| N | 1.445303  | 1.271667  | -0.193905 |
| N | -1.445304 | -1.271904 | -0.193325 |
| C | 3.898746  | -0.753873 | -0.01925  |
| C | 5.104378  | 1.368047  | 0.21013   |
| H | 5.110164  | 2.450385  | 0.247172  |
| C | 6.315656  | 0.717874  | 0.45907   |
| C | 6.328139  | -0.716524 | 0.473712  |
| C | 5.126641  | -1.389102 | 0.239649  |
| H | 5.146287  | -2.471039 | 0.295933  |
| C | -6.31566  | -0.717895 | 0.45905   |
| C | -6.328115 | 0.716495  | 0.473787  |
| C | -5.126603 | 1.389076  | 0.239786  |
| H | -5.146284 | 2.471013  | 0.296031  |
| C | -3.881865 | -0.715148 | -0.035456 |
| C | -5.104368 | -1.368062 | 0.210146  |
| H | -5.110175 | -2.450406 | 0.247066  |
| C | 8.704889  | -0.687751 | 0.980373  |
| H | 9.635183  | -1.210286 | 1.182193  |
| C | 7.555381  | -1.395429 | 0.744048  |
| H | 7.560605  | -2.482141 | 0.757153  |
| C | 8.692879  | 0.738655  | 0.966329  |
| H | 9.614253  | 1.280582  | 1.157603  |
| C | 7.531686  | 1.422011  | 0.71614   |
| H | 7.518637  | 2.50867   | 0.707612  |
| C | -8.692926 | -0.73868  | 0.966124  |
| H | -9.61432  | -1.280615 | 1.157287  |
| C | -8.704907 | 0.687745  | 0.980266  |
| H | -9.635205 | 1.210286  | 1.182051  |
| C | -7.555366 | 1.395416  | 0.744072  |
| H | -7.560582 | 2.482127  | 0.757247  |
| C | -7.531724 | -1.422037 | 0.71597   |
| H | -7.51869  | -2.508695 | 0.707364  |

**9c**

|   |           |           |           |
|---|-----------|-----------|-----------|
| N | 1.466662  | -1.336569 | -0.482144 |
| H | -1.175519 | 0.330963  | -0.352026 |
| H | 1.175518  | -0.330959 | -0.352027 |
| N | -1.466663 | 1.336574  | -0.482144 |
| C | -1.615366 | -3.466703 | -1.130884 |
| H | -1.322506 | -4.458331 | -1.447715 |
| C | -0.729425 | -2.383532 | -0.78925  |
| C | 0.680654  | -2.420315 | -0.777028 |
| C | 1.558161  | -3.511808 | -1.038109 |
| H | 1.249921  | -4.512051 | -1.306678 |

|   |           |           |           |   |            |           |           |
|---|-----------|-----------|-----------|---|------------|-----------|-----------|
| C | 2.850092  | -3.050227 | -0.890933 | C | 3.881911   | 0.70806   | -0.290311 |
| H | 3.752668  | -3.620336 | -1.051063 | C | 5.092304   | 1.358188  | -0.024505 |
| C | 2.785566  | -1.664394 | -0.540504 | H | 5.099275   | 2.44081   | 0.008754  |
| C | 3.894986  | -0.768721 | -0.269029 | C | -8.696183  | 0.719822  | 0.830735  |
| C | 2.756417  | 1.588025  | -0.576571 | C | -7.515701  | 1.412273  | 0.567419  |
| C | 2.883621  | 2.973388  | -1.000648 | H | -7.519544  | 2.499588  | 0.586568  |
| H | 3.801826  | 3.498087  | -1.221011 | C | -8.688179  | -0.732587 | 0.809517  |
| C | 1.615365  | 3.46671   | -1.130876 | C | -7.500309  | -1.404046 | 0.526257  |
| H | 1.322505  | 4.458338  | -1.447705 | H | -7.492211  | -2.491404 | 0.513674  |
| C | 0.729424  | 2.383537  | -0.789246 | C | 8.688165   | 0.73257   | 0.809511  |
| C | -0.680655 | 2.42032   | -0.777024 | C | 8.696196   | -0.719839 | 0.830739  |
| C | -1.558162 | 3.511814  | -1.038104 | C | 7.515695   | -1.412272 | 0.56742   |
| H | -1.249921 | 4.512057  | -1.306671 | H | 7.519529   | -2.499588 | 0.586567  |
| C | -2.850093 | 3.050232  | -0.890931 | C | 7.500316   | 1.404048  | 0.526256  |
| H | -3.752668 | 3.620342  | -1.05106  | H | 7.492226   | 2.491405  | 0.513675  |
| C | -2.785567 | 1.664399  | -0.540504 | C | -11.06241  | -0.74268  | 1.361538  |
| C | -3.881913 | -0.708055 | -0.290314 | H | -11.981697 | -1.282465 | 1.568391  |
| C | -2.756418 | -1.58802  | -0.576574 | C | -11.070285 | 0.687298  | 1.38248   |
| C | -2.883622 | -2.973382 | -1.000655 | H | -11.995464 | 1.210594  | 1.604898  |
| H | -3.801827 | -3.498079 | -1.22102  | C | -9.927242  | 1.391798  | 1.12595   |
| N | -1.447434 | -1.270053 | -0.464151 | H | -9.931624  | 2.478459  | 1.141733  |
| N | 1.447432  | 1.270058  | -0.464149 | C | 11.070253  | -0.687323 | 1.38247   |
| C | -3.894987 | 0.768727  | -0.269032 | H | 11.995408  | -1.210664 | 1.604881  |
| C | -5.092304 | -1.358182 | -0.024506 | C | 11.062448  | 0.742656  | 1.361543  |
| H | -5.099273 | -2.440804 | 0.008754  | H | 11.981761  | 1.282395  | 1.568403  |
| C | -6.30735  | -0.706309 | 0.253181  | C | 9.91171    | 1.426554  | 1.084714  |
| C | -6.315714 | 0.735379  | 0.274547  | H | 9.903907   | 2.513182  | 1.068669  |
| C | -5.106681 | 1.405526  | 0.016708  | C | -9.91163   | -1.426551 | 1.084699  |
| H | -5.121199 | 2.487395  | 0.078315  | H | -9.90384   | -2.513177 | 1.068656  |
| C | 6.307348  | 0.706315  | 0.253181  | C | 9.927169   | -1.391798 | 1.125932  |
| C | 6.315714  | -0.735374 | 0.27455   | H | 9.931565   | -2.478457 | 1.141717  |
| C | 5.106679  | -1.40552  | 0.01671   |   |            |           |           |
| H | 5.121196  | -2.487389 | 0.078318  |   |            |           |           |
